# Supplementary material for: Amide-controlled, one-pot synthesis of tri-substituted purines generates structural diversity and analogues with trypanocidal activity
Source: PubMed Central journal article supplement (PMC5390905; doi:10.1038/srep09139), 2015-03-16

## Supplementary Information

Amide-controlled, one-pot synthesis of tri-substituted purines generates structural diversity and analogues with trypanocidal activity

Maria J. Pineda de las Infantas y Villatoro<sup>a,\*</sup>, Juan D. Unciti-Broceta<sup>b</sup>, Rafael Contreras Montoya<sup>b</sup>, Jose A. Garcia-Salcedo<sup>b,c</sup>, Miguel A. Gallo Mezo<sup>a</sup>, Asier Unciti-Broceta<sup>d,\*</sup> and Juan J. Diaz-Mochon<sup>a,b,\*</sup>

<sup>a</sup> *Departamento de Química Farmacéutica y Orgánica. University of Granada, Campus de Cartuja s/n, 18071 Granada, Spain*

<sup>b</sup> *Pfizer - Universidad de Granada - Junta de Andalucía Centre for Genomics and Oncological Research (GENYO), Parque Tecnológico de Ciencias de la Salud (PTS), Avenida de la Ilustración 114, 18016 Granada, Spain*

<sup>c</sup> *Unidad de Enfermedades Infecciosas, Hospital Universitario San Cecilio, Instituto de Investigación Biosanitaria de Granada, Dr. Azpitarte, 4, 18012 Granada, Spain*

<sup>d</sup> *Edinburgh Cancer Research UK Centre, MRC Institute of Genetics and Molecular Medicine, University of Edinburgh, Crewe Road South, Edinburgh EH4 2XR, UK.*

\* To whom the correspondence should be addressed. E-mail: [mjpineda@ugr.es](mailto:mjpineda@ugr.es), [Asier.Unciti-Broceta@igmm.ed.ac.uk](mailto:Asier.Unciti-Broceta@igmm.ed.ac.uk), [juanjose.diaz@genyo.es](mailto:juanjose.diaz@genyo.es)

## 8. 5-amino-6-chloro-4-isopropylaminopyrimidine (H-NMR)

17 Jul 2012

|                        |                                                    |                        |              |
|------------------------|----------------------------------------------------|------------------------|--------------|
| Acquisition Time (sec) | 2.5559                                             | Date                   | Jan 31 2012  |
| File Name              | C:\Users\usuario\Documents\Espectros Asier\PRE-AM1 | Frequency (MHz)        | 400.58       |
| Nucleus                | 1H                                                 | Number of Transients   | 8            |
| Points Count           | 16384                                              | Pulse Sequence         | s2pul        |
| Sweep Width (Hz)       | 6410.26                                            | Temperature (degree C) | 25.000       |
|                        |                                                    | Original Points Count  | 16384        |
|                        |                                                    | Solvent                | CHLOROFORM-D |

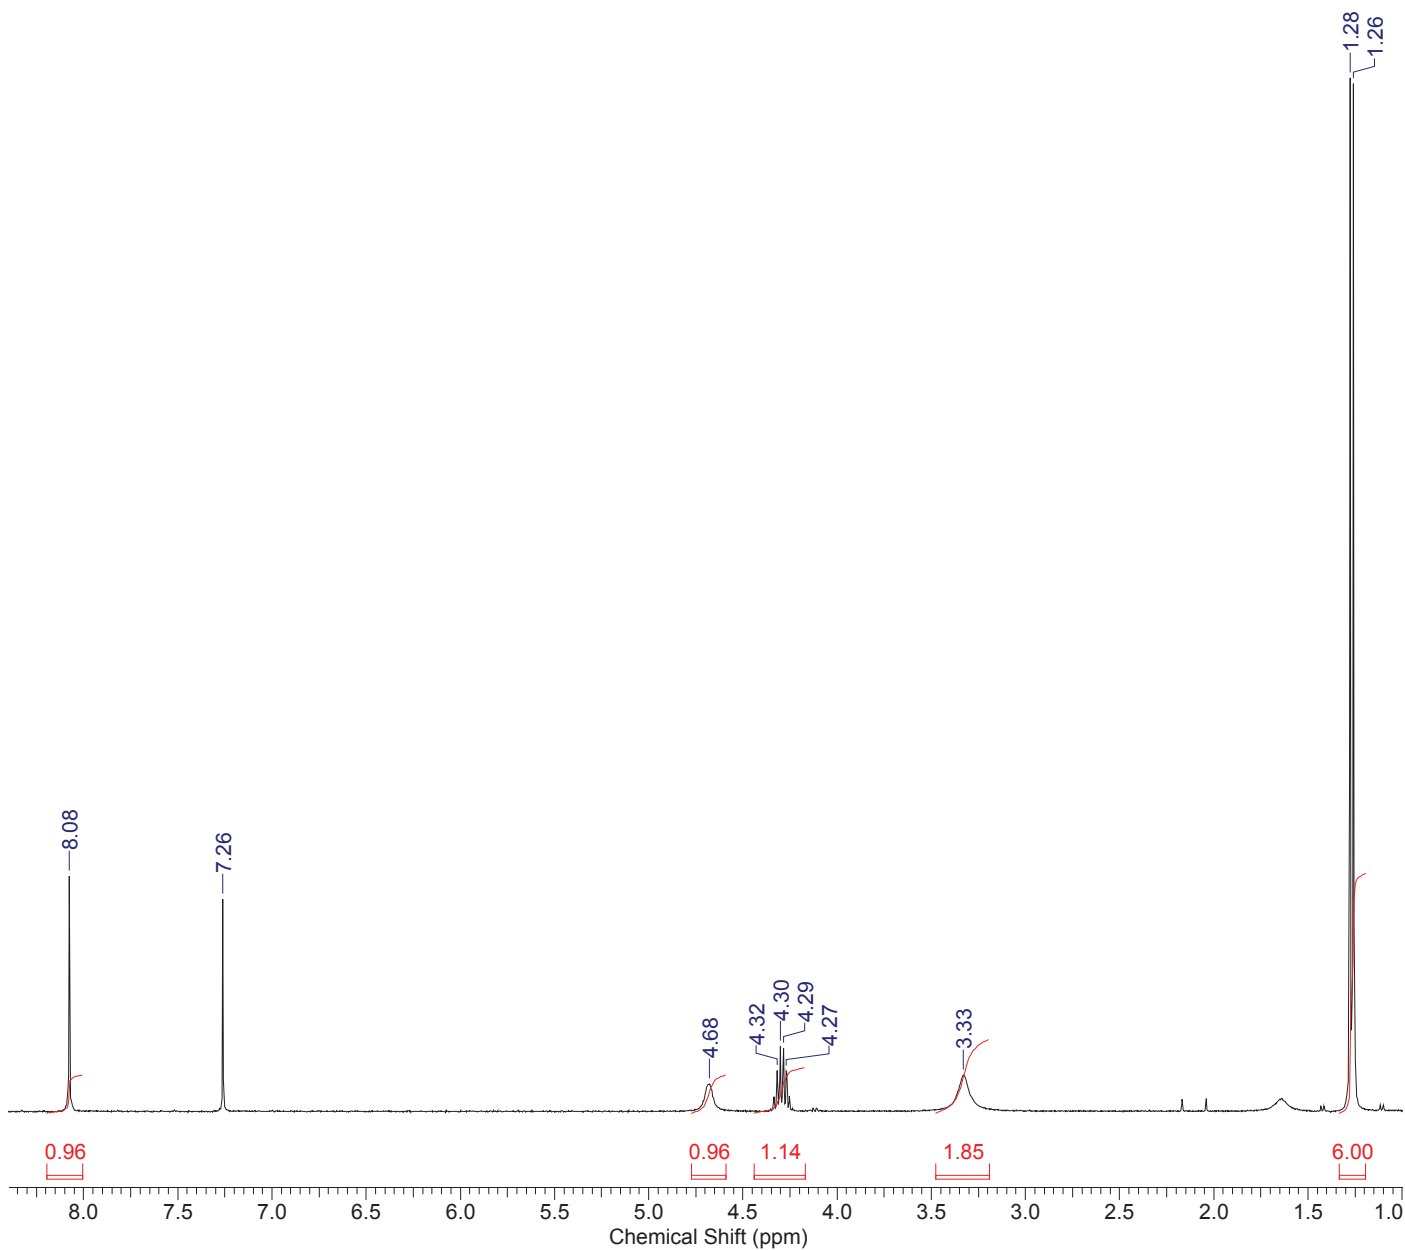

| No. | (ppm) | (Hz)   | Height |
|-----|-------|--------|--------|
| 1   | 1.26  | 504.8  | 0.9945 |
| 2   | 1.28  | 511.1  | 1.0000 |
| 3   | 3.33  | 1333.5 | 0.0371 |
| 4   | 4.27  | 1710.0 | 0.0404 |
| 5   | 4.29  | 1716.6 | 0.0631 |
| 6   | 4.30  | 1723.3 | 0.0649 |
| 7   | 4.32  | 1729.9 | 0.0412 |
| 8   | 4.68  | 1873.9 | 0.0284 |
| 9   | 7.26  | 2908.4 | 0.2072 |
| 10  | 8.08  | 3235.1 | 0.2294 |

| No. | (ppm)          | Value | Absolute Value |
|-----|----------------|-------|----------------|
| 1   | [1.19 .. 1.34] | 6.000 | 2.56874e+7     |
| 2   | [3.19 .. 3.48] | 1.853 | 7.93366e+6     |
| 3   | [4.17 .. 4.44] | 1.143 | 4.89318e+6     |
| 4   | [4.59 .. 4.77] | 0.960 | 4.11209e+6     |
| 5   | [8.00 .. 8.20] | 0.960 | 4.11063e+6     |

## 12. 5-Amino-4-benzylamino-6-chloropyrimidine (C-NMR)

8 Jul 2013

|                        |                                                                 |                        |                 |
|------------------------|-----------------------------------------------------------------|------------------------|-----------------|
| Acquisition Time (sec) | 1.0486                                                          | Date                   | Mar 6 2012      |
| File Name              | C:\Users\usuario\Documents\Espectros Asier\12-511_Pre-2\carbono |                        |                 |
| Frequency (MHz)        | 125.68                                                          | Nucleus                | <sup>13</sup> C |
| Points Count           | 32768                                                           | Pulse Sequence         | s2pul           |
| Sweep Width (Hz)       | 31250.00                                                        | Temperature (degree C) | 25.000          |
|                        |                                                                 | Original Points Count  | 32768           |
|                        |                                                                 | Solvent                | CHLOROFORM-D    |

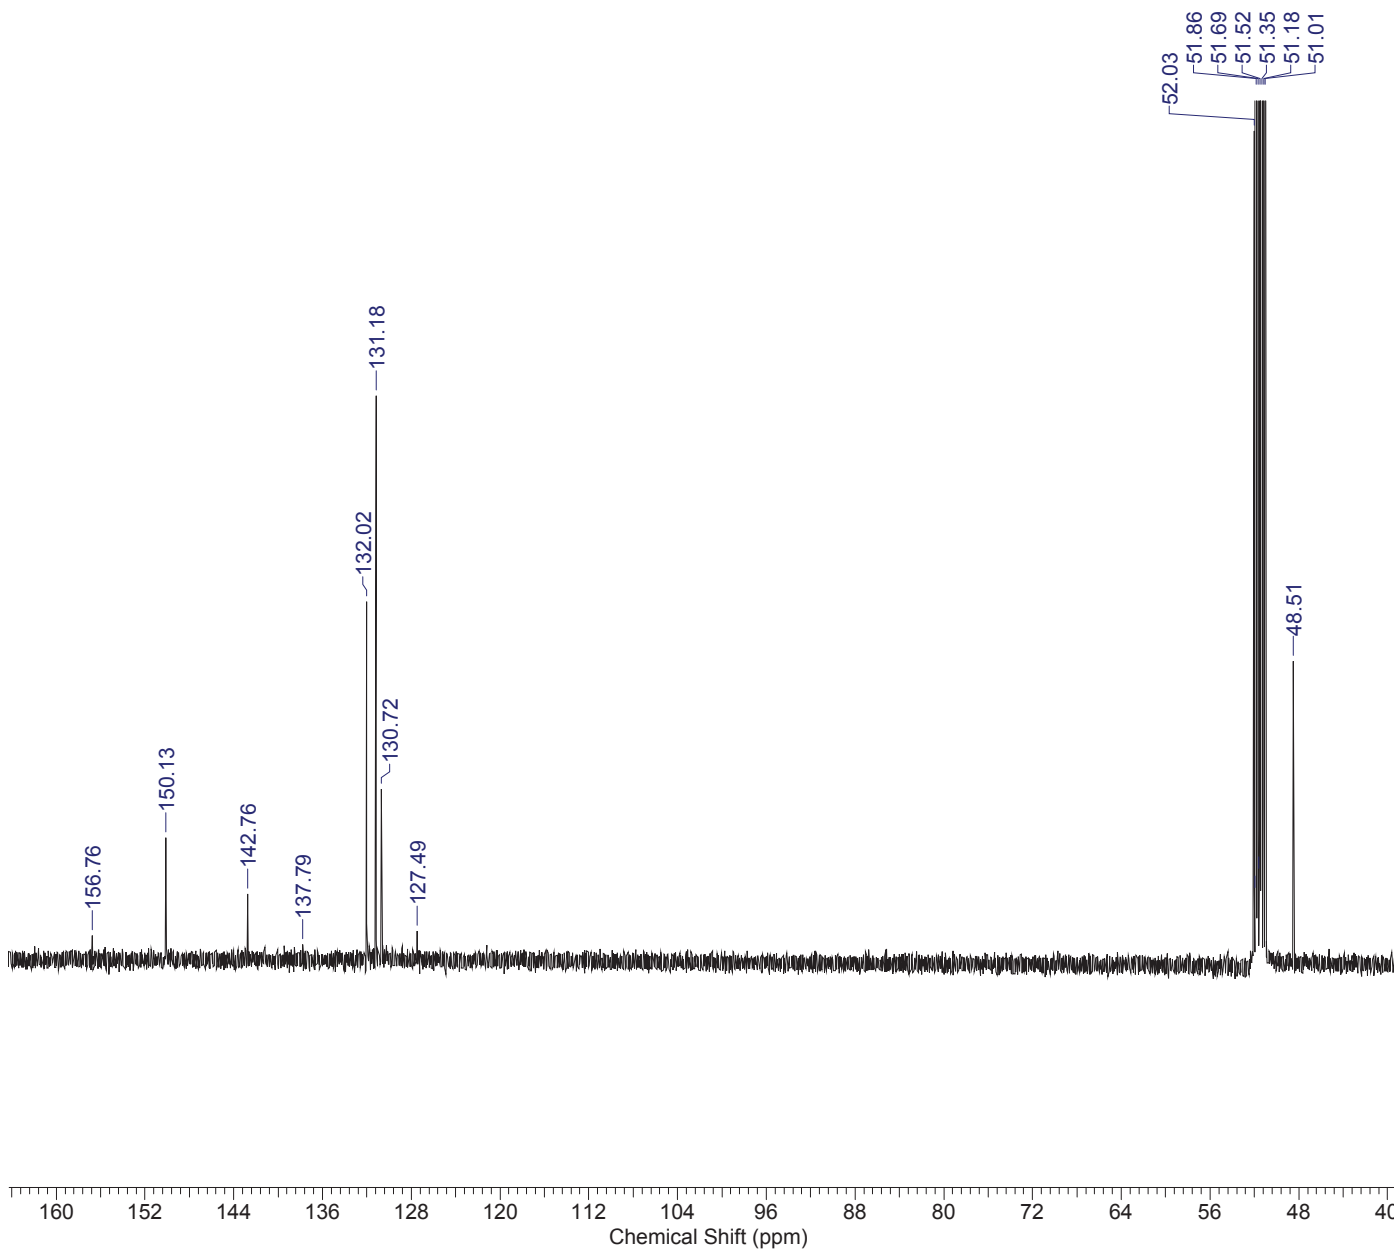

| No. | (ppm) | (Hz)   | Height | No. | (ppm)  | (Hz)    | Height |
|-----|-------|--------|--------|-----|--------|---------|--------|
| 1   | 48.51 | 6096.4 | 0.0362 | 11  | 52.03  | 6539.9  | 0.1005 |
| 2   | 51.01 | 6411.1 | 0.1618 | 12  | 127.49 | 16023.5 | 0.0035 |
| 3   | 51.18 | 6432.1 | 0.3818 | 13  | 130.72 | 16429.8 | 0.0207 |
| 4   | 51.35 | 6454.0 | 0.8678 | 14  | 131.18 | 16487.0 | 0.0684 |
| 5   | 51.52 | 6475.0 | 1.0000 | 15  | 132.02 | 16592.8 | 0.0434 |
| 6   | 51.63 | 6489.3 | 0.0104 | 16  | 137.79 | 17318.6 | 0.0019 |
| 7   | 51.69 | 6496.9 | 0.7416 | 17  | 142.76 | 17943.3 | 0.0080 |
| 8   | 51.81 | 6511.3 | 0.0145 | 18  | 150.13 | 18869.3 | 0.0148 |
| 9   | 51.86 | 6517.9 | 0.4658 | 19  | 156.76 | 19701.9 | 0.0029 |
| 10  | 51.97 | 6532.2 | 0.0080 |     |        |         |        |

## 12. 5-Amino-4-benzylamino-6-chloropyrimidine (H-NMR)

8 Jul 2013

|                        |                                                                |              |                  |                      |       |
|------------------------|----------------------------------------------------------------|--------------|------------------|----------------------|-------|
| Acquisition Time (sec) | 1.7432                                                         | Date         | Mar 6 2012       |                      |       |
| File Name              | C:\Users\usuario\Documents\Espectros Asier\12-511_Pre-2\proton |              |                  |                      |       |
| Frequency (MHz)        | 499.79                                                         | Nucleus      | 1H               | Number of Transients | 80    |
| Original Points Count  | 13048                                                          | Points Count | 16384            | Pulse Sequence       | s2pul |
| Solvent                | METHANOL-D4                                                    |              | Sweep Width (Hz) | 7485.03              |       |
| Temperature (degree C) | 25.000                                                         |              |                  |                      |       |

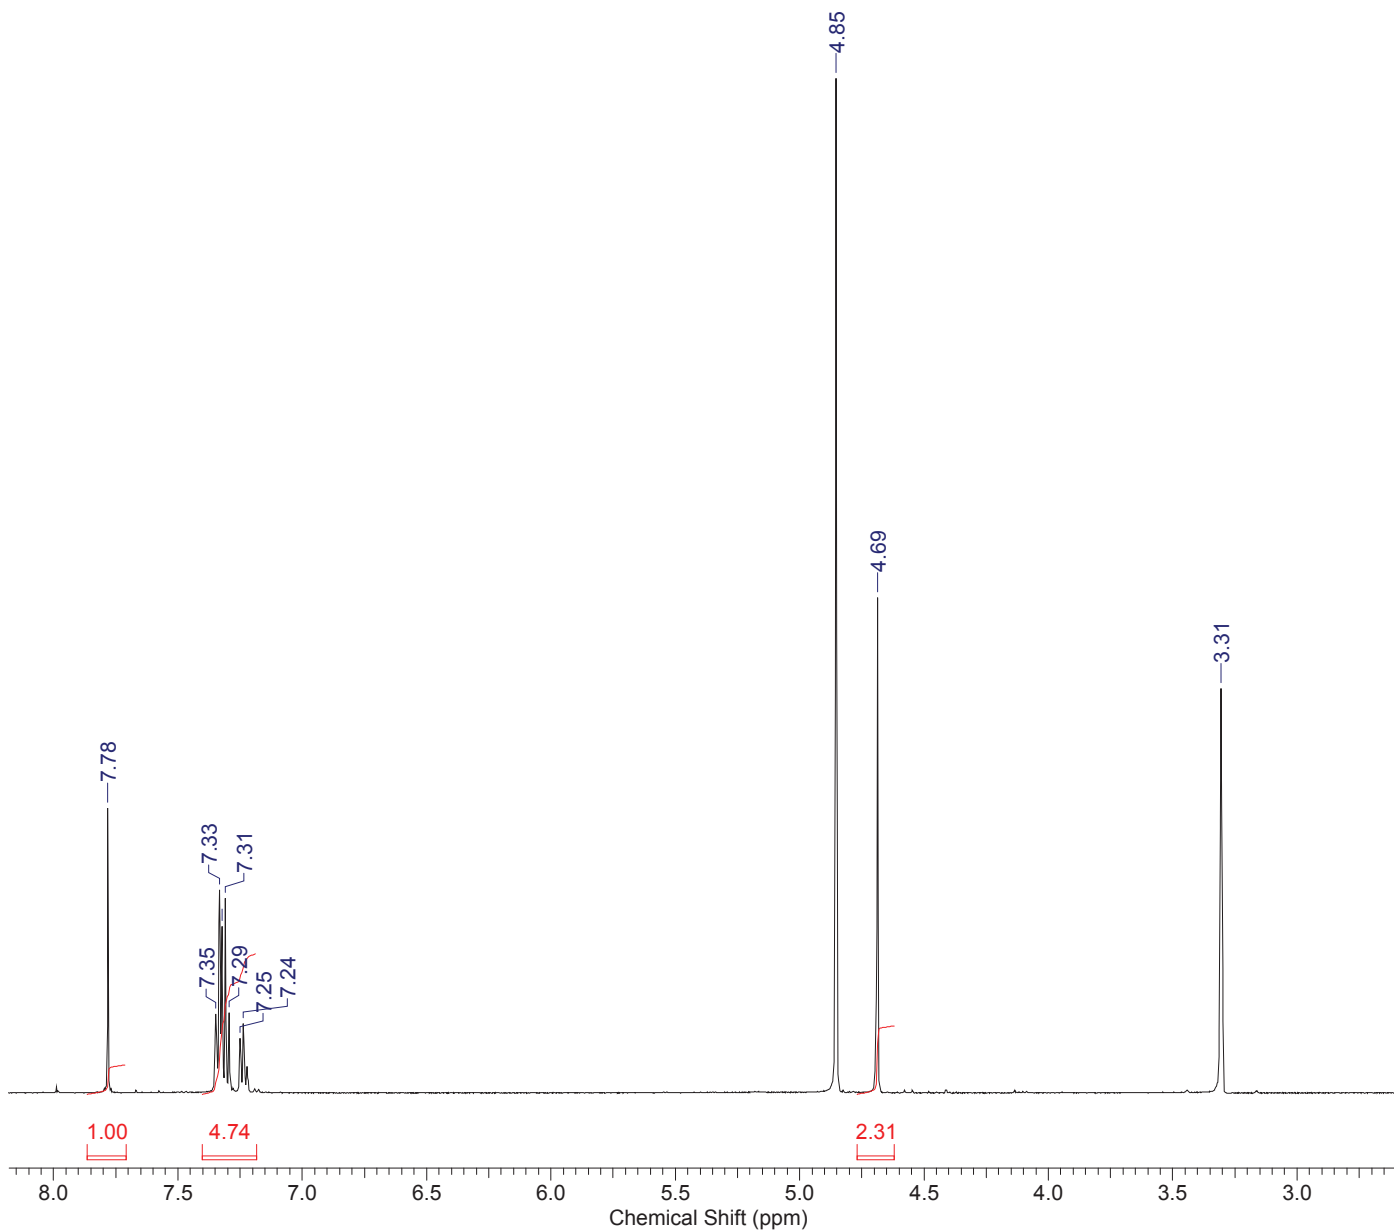

| No. | (ppm) | (Hz)   | Height |
|-----|-------|--------|--------|
| 1   | 3.31  | 1652.0 | 0.3992 |
| 2   | 4.69  | 2342.8 | 0.4889 |
| 3   | 4.85  | 2425.5 | 1.0000 |
| 4   | 7.24  | 3616.6 | 0.0695 |
| 5   | 7.25  | 3623.4 | 0.0555 |
| 6   | 7.29  | 3644.9 | 0.0804 |
| 7   | 7.31  | 3652.7 | 0.1928 |
| 8   | 7.32  | 3660.0 | 0.1651 |
| 9   | 7.33  | 3665.0 | 0.2014 |
| 10  | 7.35  | 3671.9 | 0.0790 |
| 11  | 7.78  | 3889.3 | 0.2820 |

| No. | (ppm)          | Value | Absolute Value |
|-----|----------------|-------|----------------|
| 1   | [4.62 .. 4.77] | 2.308 | 5.89304e+7     |
| 2   | [7.18 .. 7.40] | 4.741 | 1.21016e+8     |
| 3   | [7.71 .. 7.87] | 1.000 | 2.55278e+7     |

# Elemental Composition Report

## Single Mass Analysis

Tolerance = 5.0 mDa / DBE: min = -1.5, max = 50.0

Element prediction: Off

Number of isotope peaks used for i-FIT = 3

Monoisotopic Mass, Even Electron Ions

383 formula(e) evaluated with 7 results within limits (up to 50 best isotopic matches for each mass)

Elements Used:

C: 0-11 H: 0-1000 N: 0-9 O: 0-20 Cl: 0-1

MJ-2 89 (1.975)

1: TOF MS ES+

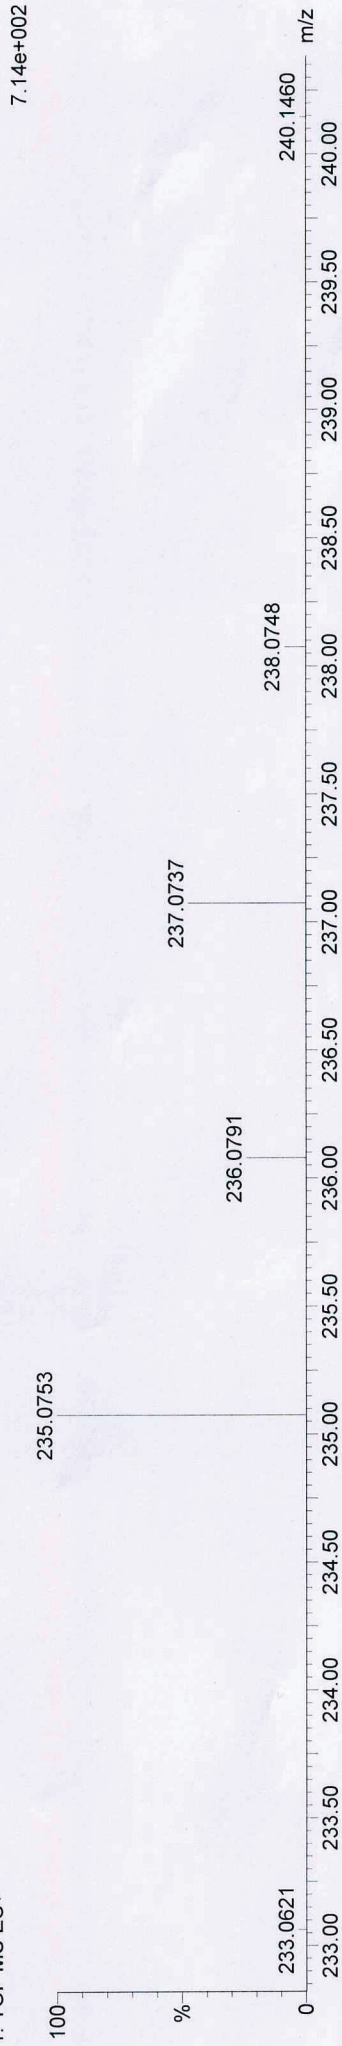

Minimum:  
Maximum:

-1.5  
50.0

| Mass     | Calc. Mass | mDa  | PPM   | DBE  | i-FIT | Formula         |
|----------|------------|------|-------|------|-------|-----------------|
| 235.0753 | 235.0750   | 0.3  | 1.3   | 7.5  | 24.3  | C11 H12 N4 Cl   |
|          | 235.0737   | 1.6  | 6.8   | 2.5  | 31.4  | C10 H16 O4 Cl   |
|          | 235.0710   | 4.3  | 18.3  | 3.5  | 43.6  | C6 H12 N6 O2 Cl |
|          | 235.0719   | 3.4  | 14.5  | 7.5  | 173.8 | C11 H11 N2 O4   |
|          | 235.0791   | -3.8 | -16.2 | 3.5  | 198.1 | C5 H11 N6 O5    |
|          | 235.0778   | -2.5 | -10.6 | -1.5 | 205.2 | C4 H15 N2 O9    |
|          | 235.0751   | 0.2  | 0.9   | -0.5 | 222.4 | H11 N8 O7       |

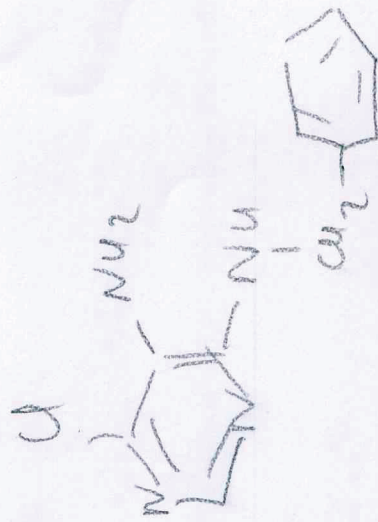

|                        |                                                                        |                  |             |                      |       |
|------------------------|------------------------------------------------------------------------|------------------|-------------|----------------------|-------|
| Acquisition Time (sec) | 1.0486                                                                 | Date             | Nov 23 2012 |                      |       |
| File Name              | C:\Users\usuario\Documents\Espectros Asier\12-23752 ASIMJ-30-1\carbono |                  |             |                      |       |
| Frequency (MHz)        | 125.68                                                                 | Nucleus          | 13C         | Number of Transients | 4800  |
| Original Points Count  | 32768                                                                  | Points Count     | 32768       | Pulse Sequence       | s2pul |
| Solvent                | CHLOROFORM-D                                                           | Sweep Width (Hz) | 31250.00    |                      |       |
| Temperature (degree C) | 25.000                                                                 |                  |             |                      |       |

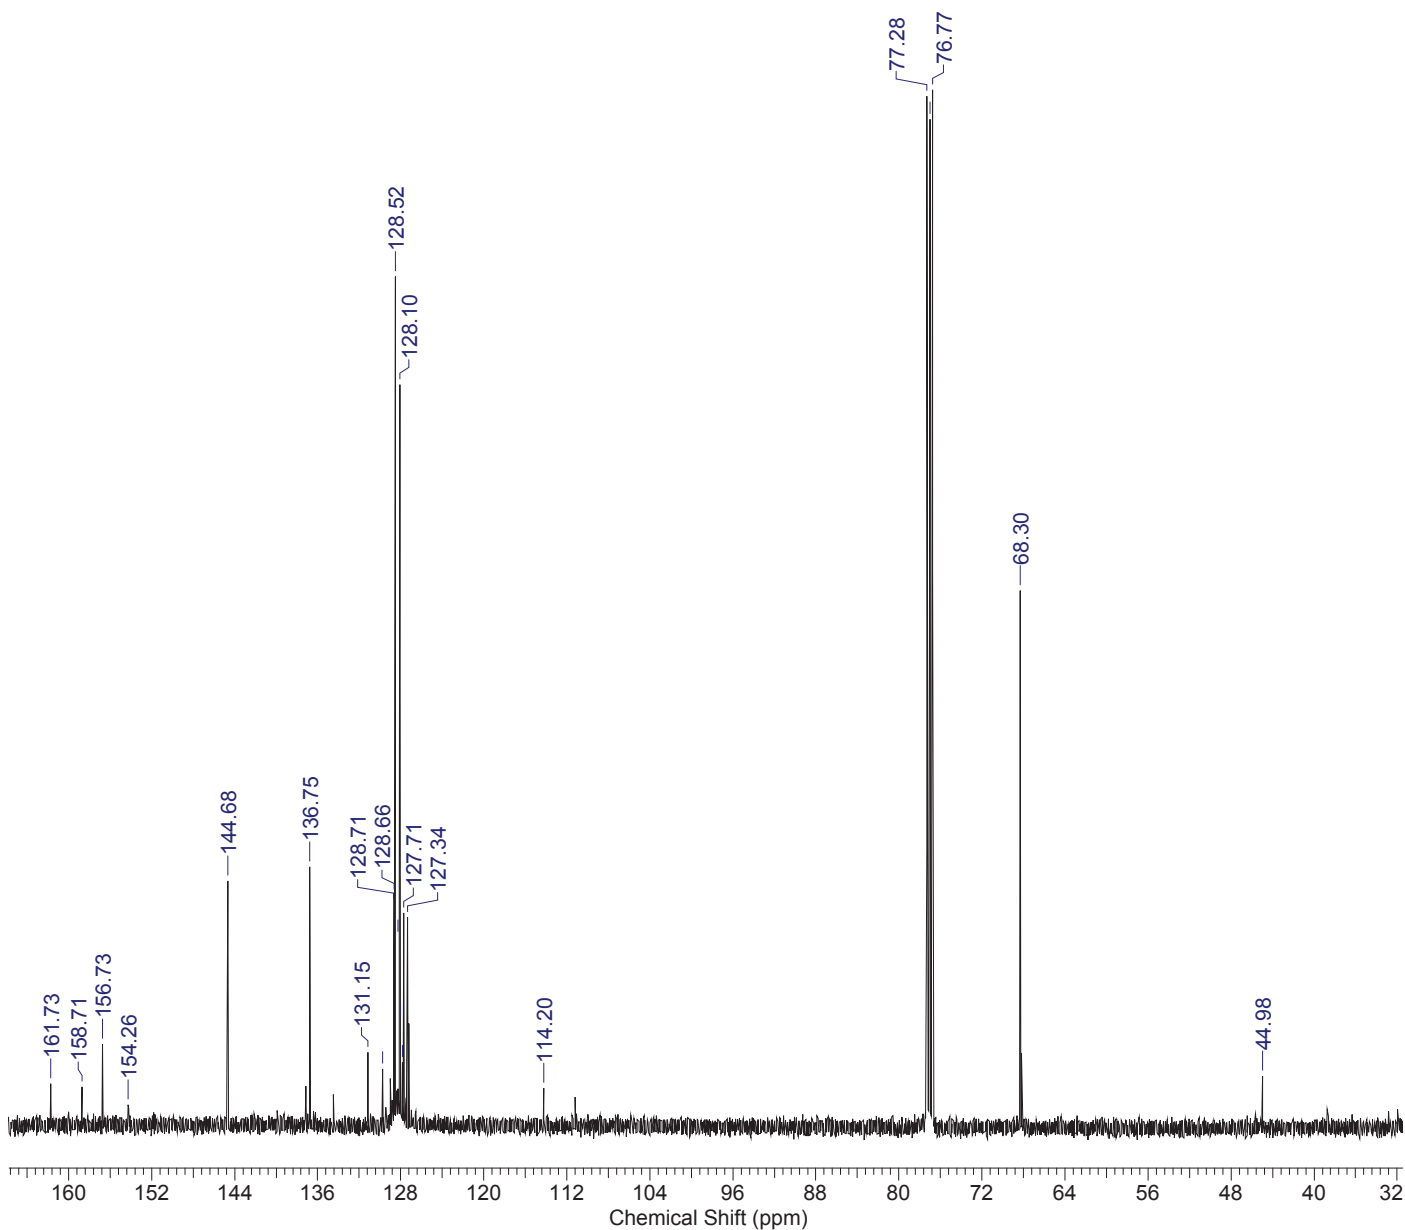

| No. | (ppm)  | (Hz)    | Height | No. | (ppm)  | (Hz)    | Height |
|-----|--------|---------|--------|-----|--------|---------|--------|
| 1   | 44.98  | 5652.9  | 0.0478 | 13  | 128.24 | 16117.9 | 0.1818 |
| 2   | 68.30  | 8583.6  | 0.5167 | 14  | 128.52 | 16153.2 | 0.8196 |
| 3   | 76.77  | 9648.9  | 1.0000 | 15  | 128.66 | 16170.4 | 0.2225 |
| 4   | 77.03  | 9681.4  | 0.9718 | 16  | 128.71 | 16177.0 | 0.2132 |
| 5   | 77.28  | 9712.8  | 0.9939 | 17  | 129.76 | 16308.6 | 0.0542 |
| 6   | 114.20 | 14353.6 | 0.0357 | 18  | 131.15 | 16483.2 | 0.0704 |
| 7   | 127.24 | 15992.0 | 0.0981 | 19  | 136.75 | 17187.0 | 0.2494 |
| 8   | 127.34 | 16004.4 | 0.2005 | 20  | 144.68 | 18184.6 | 0.2363 |
| 9   | 127.71 | 16051.1 | 0.2053 | 21  | 154.26 | 19388.2 | 0.0201 |
| 10  | 127.85 | 16069.3 | 0.0603 | 22  | 156.73 | 19698.1 | 0.0787 |
| 11  | 128.01 | 16088.3 | 0.1016 | 23  | 158.71 | 19948.0 | 0.0371 |
| 12  | 128.10 | 16099.8 | 0.7153 | 24  | 161.73 | 20326.6 | 0.0404 |

|                        |                                                                       |                  |             |                      |       |
|------------------------|-----------------------------------------------------------------------|------------------|-------------|----------------------|-------|
| Acquisition Time (sec) | 2.0447                                                                | Date             | Nov 23 2012 |                      |       |
| File Name              | C:\Users\usuario\Documents\Espectros Asier\12-23752 ASIMJ-30-1\proton |                  |             |                      |       |
| Frequency (MHz)        | 499.79                                                                | Nucleus          | 1H          | Number of Transients | 8     |
| Original Points Count  | 16384                                                                 | Points Count     | 16384       | Pulse Sequence       | s2pul |
| Solvent                | CHLOROFORM-D                                                          | Sweep Width (Hz) | 8012.82     |                      |       |
| Temperature (degree C) | 25.000                                                                |                  |             |                      |       |

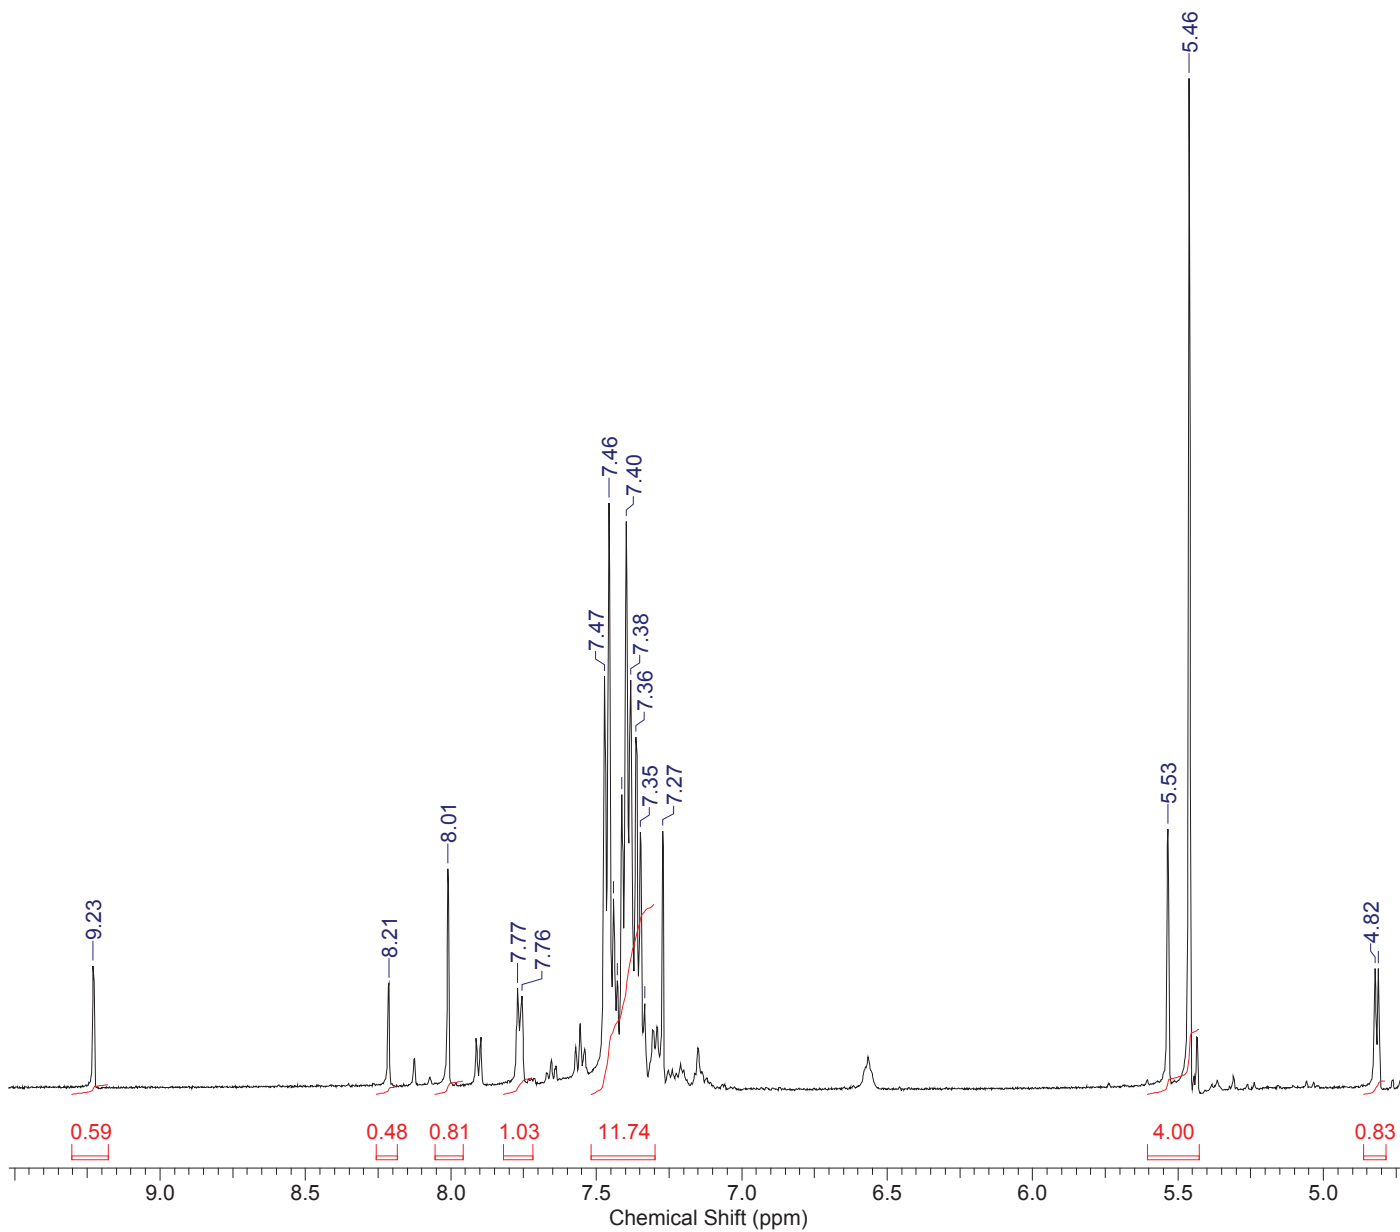

| No. | (ppm) | (Hz)   | Height | No. | (ppm) | (Hz)   | Height | No. | (ppm)          | Value  | Absolute Value |
|-----|-------|--------|--------|-----|-------|--------|--------|-----|----------------|--------|----------------|
| 1   | 4.81  | 2404.2 | 0.1236 | 11  | 7.41  | 3704.2 | 0.2949 | 1   | [4.79 .. 4.86] | 0.828  | 2.78104e+6     |
| 2   | 4.82  | 2410.0 | 0.1237 | 12  | 7.43  | 3712.0 | 0.1116 | 2   | [5.43 .. 5.61] | 4.000  | 1.34299e+7     |
| 3   | 5.46  | 2729.4 | 1.0000 | 13  | 7.44  | 3718.4 | 0.1921 | 3   | [7.30 .. 7.52] | 11.745 | 3.94331e+7     |
| 4   | 5.53  | 2766.1 | 0.2609 | 14  | 7.46  | 3726.7 | 0.5819 | 4   | [7.72 .. 7.82] | 1.026  | 3.44435e+6     |
| 5   | 7.27  | 3634.7 | 0.2593 | 15  | 7.47  | 3734.5 | 0.4113 | 5   | [7.96 .. 8.05] | 0.815  | 2.73543e+6     |
| 6   | 7.33  | 3665.6 | 0.0892 | 16  | 7.76  | 3876.4 | 0.0969 | 6   | [8.18 .. 8.26] | 0.477  | 1.60142e+6     |
| 7   | 7.35  | 3672.9 | 0.2579 | 17  | 7.77  | 3883.7 | 0.1042 | 7   | [9.18 .. 9.30] | 0.590  | 1.98125e+6     |
| 8   | 7.36  | 3680.2 | 0.3517 | 18  | 8.01  | 4003.5 | 0.2218 |     |                |        |                |
| 9   | 7.38  | 3689.5 | 0.4076 | 19  | 8.21  | 4104.8 | 0.1094 |     |                |        |                |
| 10  | 7.40  | 3696.9 | 0.5635 | 20  | 9.23  | 4612.9 | 0.1266 |     |                |        |                |

15. N5-benzylidene-6-(benzyloxy)-N4-isopropylpyrimidine-4,5-diamine HSQC

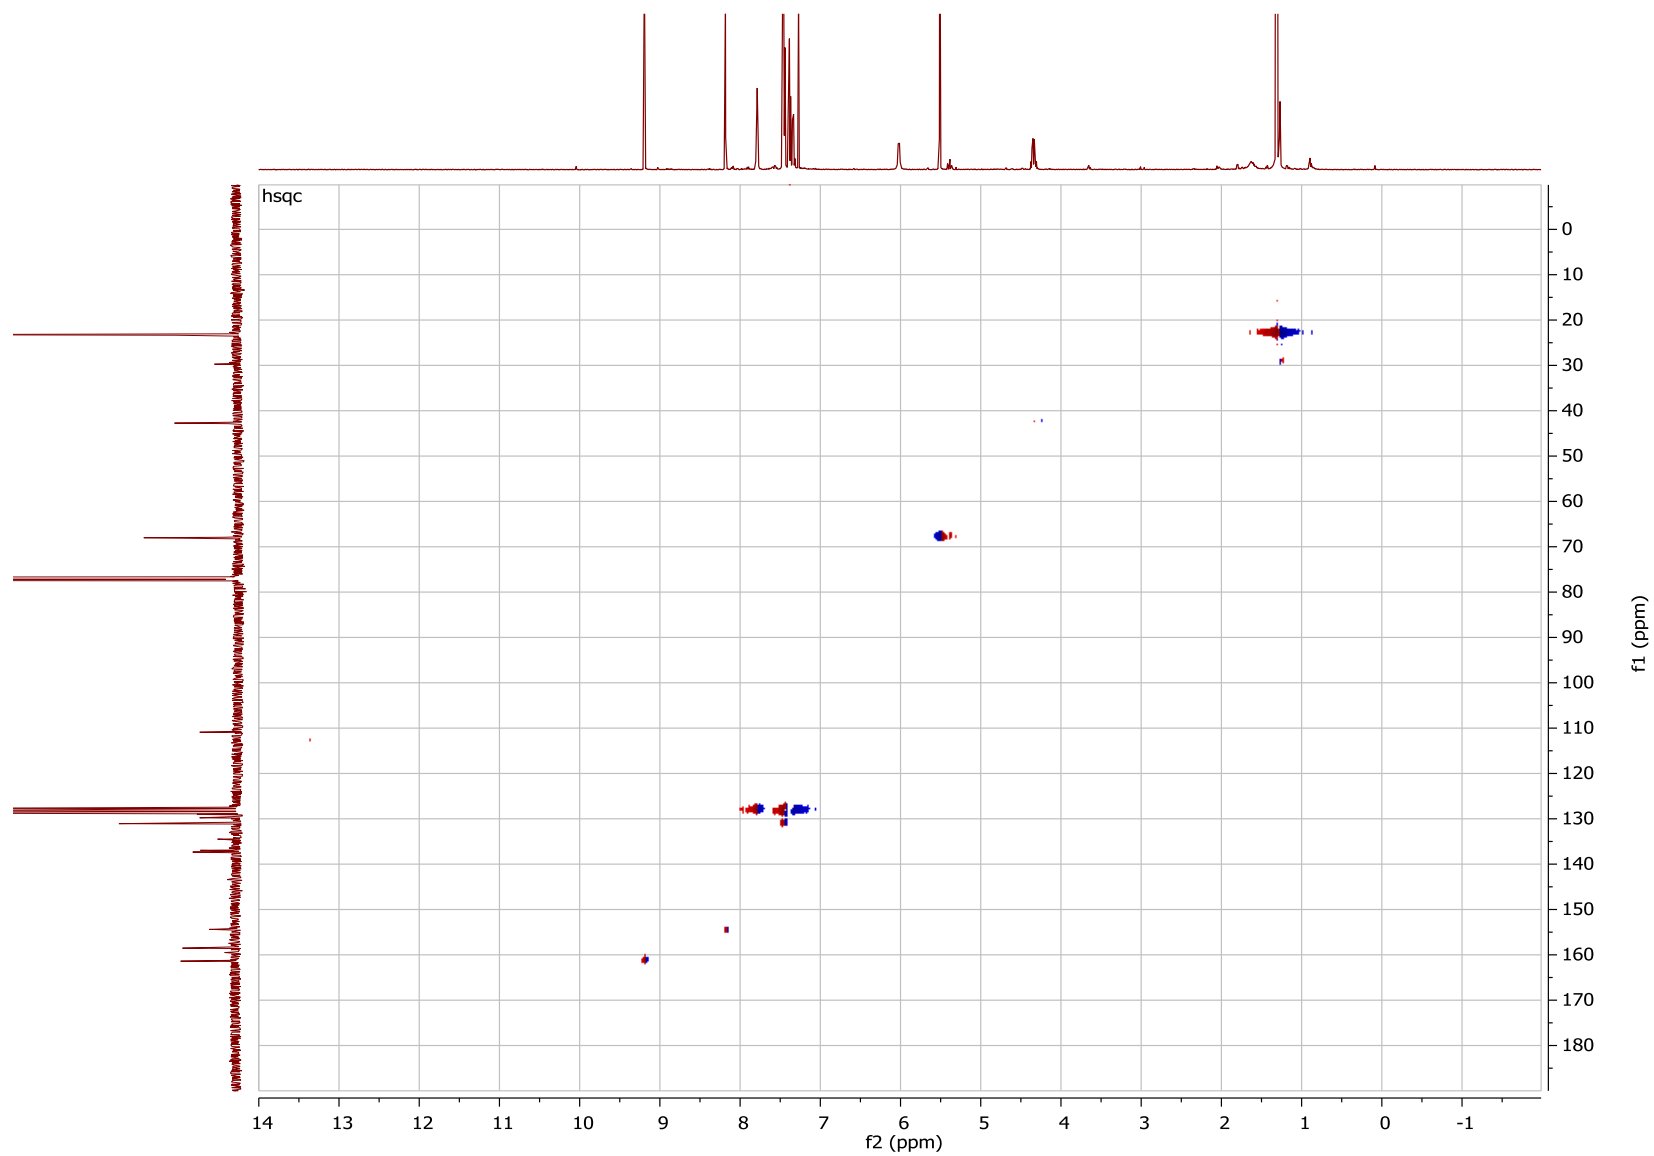



15. N5-benzylidene-6-(benzyloxy)-N4-isopropylpyrimidine-4,5-diamine HSQC Zoom in

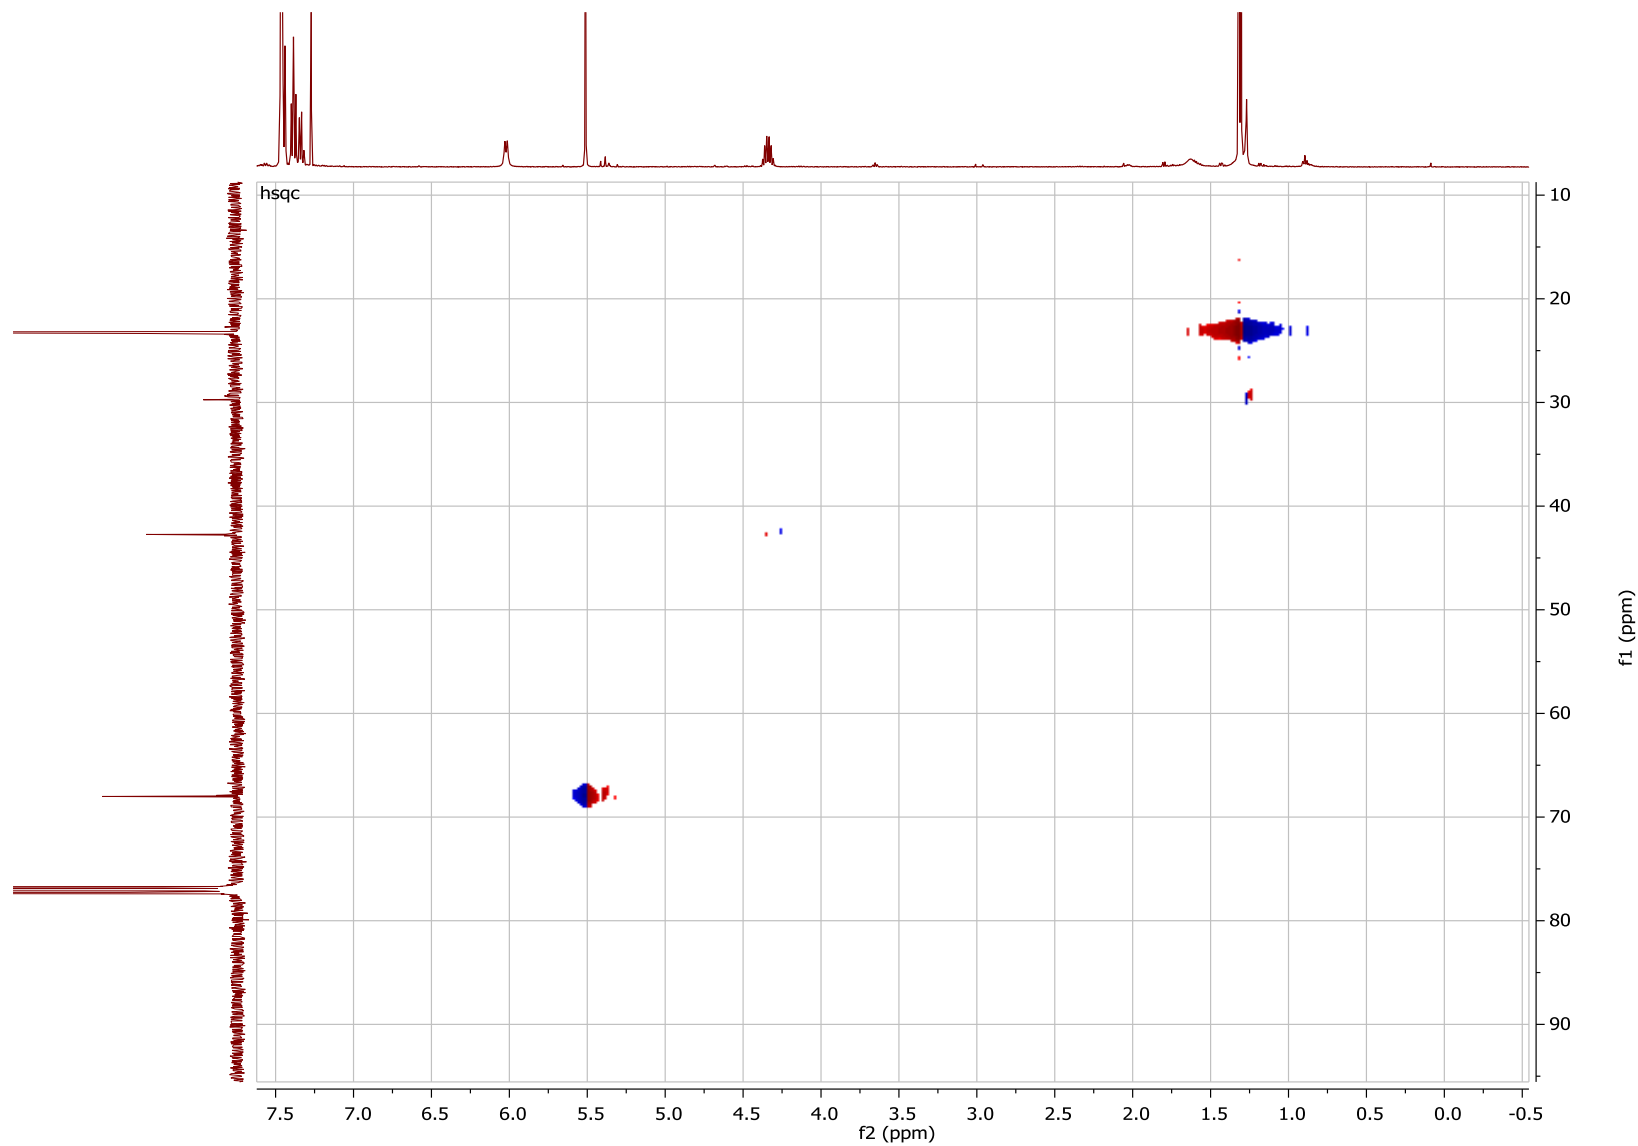

15. N5-benzylidene-6-(benzyloxy)-N4-isopropylpyrimidine-4,5-diamine HSQC Zoom in

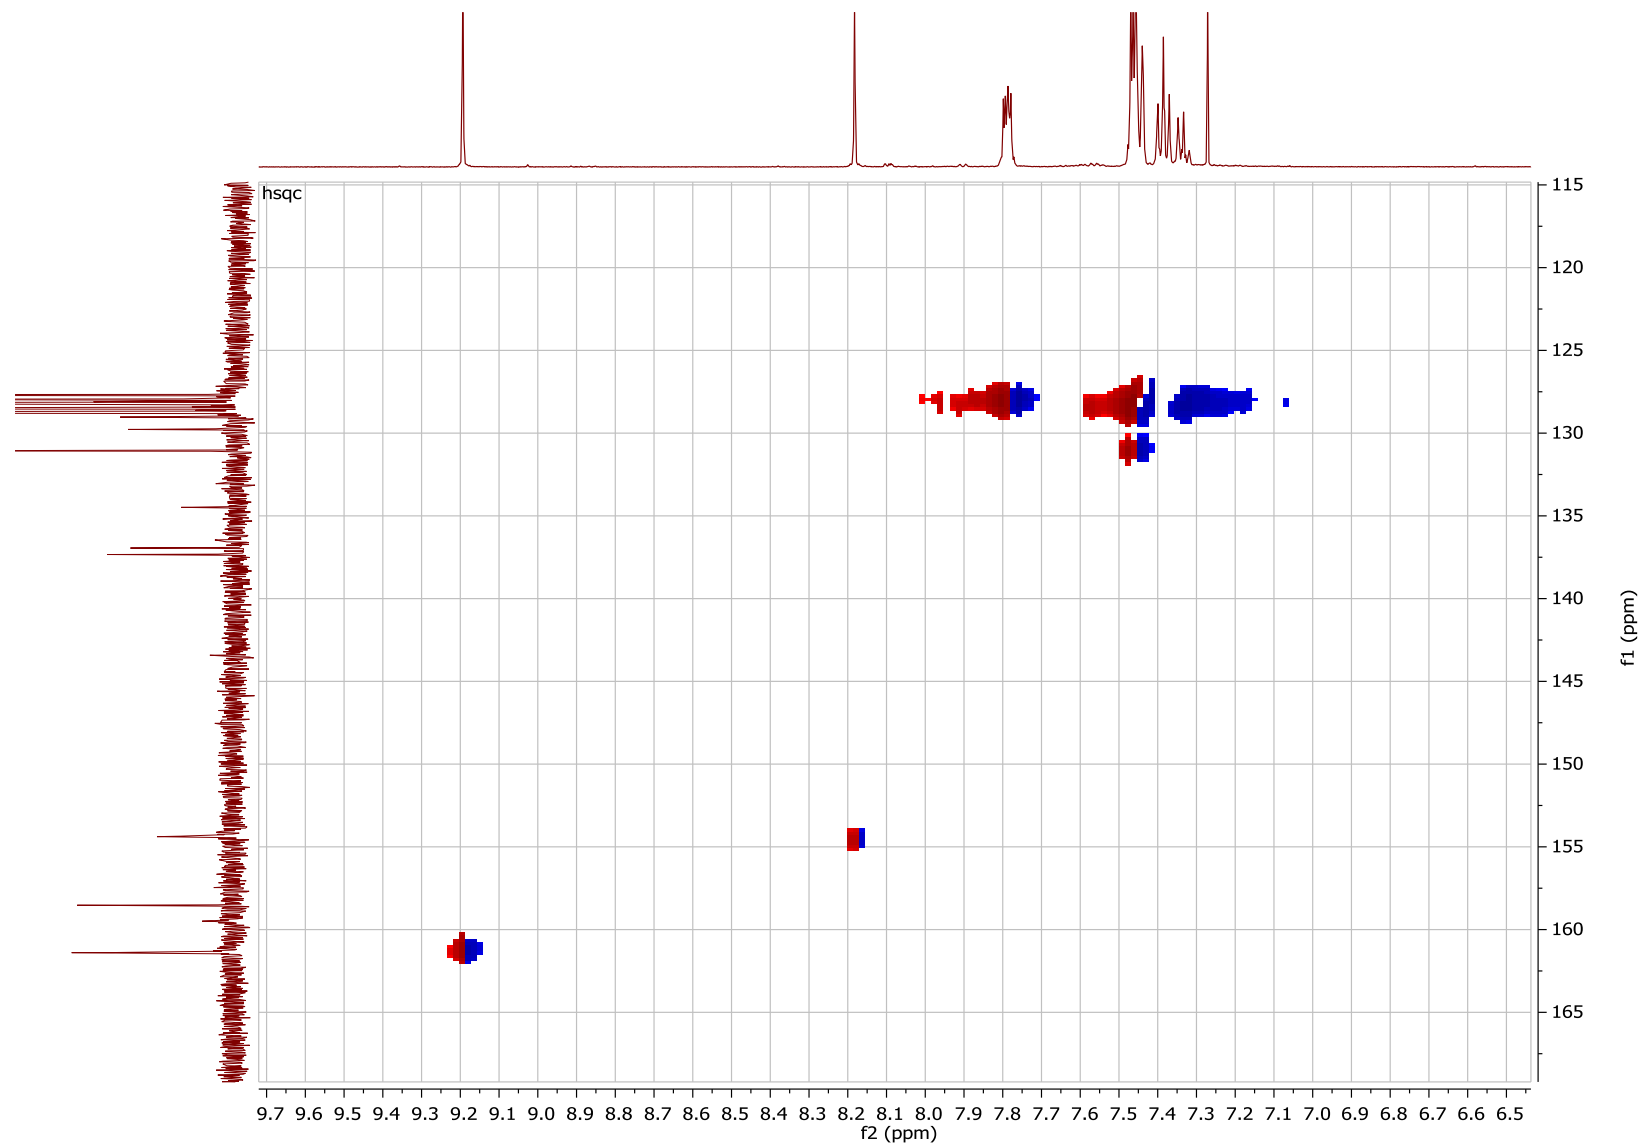

Single Mass Analysis

Tolerance = 5.0 PPM / DBE: min = -1.5, max = 50.0

Element prediction: Off

Number of isotope peaks used for i-FIT = 3

Monoisotopic Mass, Even Electron Ions

900 formula(e) evaluated with 5 results within limits (up to 50 best isotopic matches for each mass)

Elements Used:

C: 0-25 H: 0-1000 N: 0-10 O: 0-10 Na: 0-1

MJ-30-1 4 (0.087)

1: TOF MS ES+

8.79e+002

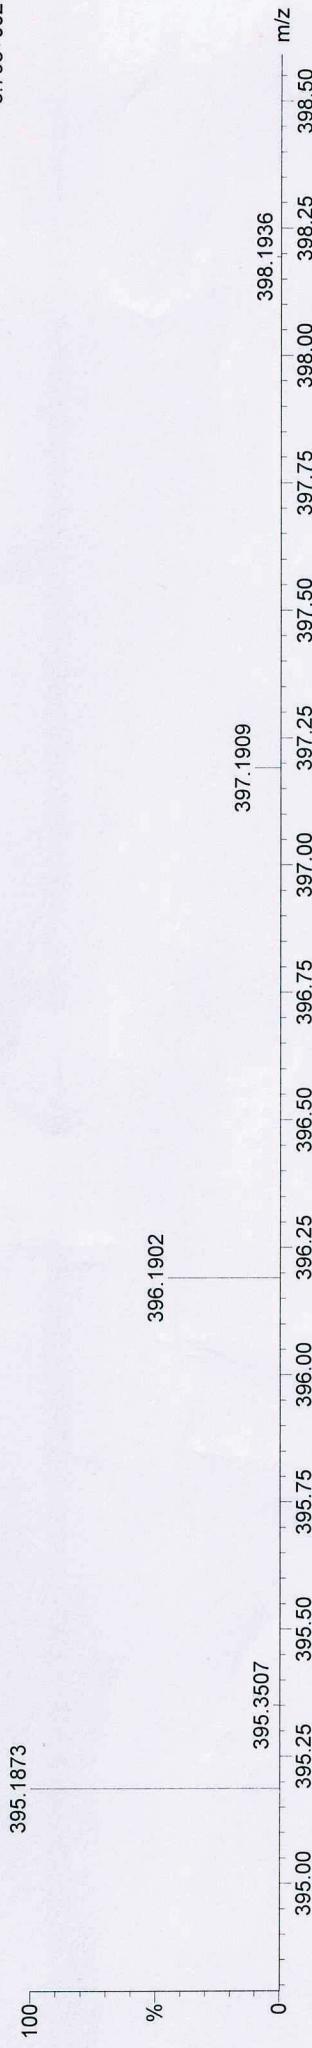

| Mass     | Calc. Mass | mDa  | PPM  | DBE  | i-FIT | Formula           |
|----------|------------|------|------|------|-------|-------------------|
| 395.1873 | 395.1872   | 0.1  | 0.3  | 16.5 | 32.0  | C25 H23 N4 O      |
|          | 395.1858   | 1.5  | 3.8  | 11.5 | 38.3  | C24 H27 O5        |
|          | 395.1890   | -1.7 | -4.3 | 3.5  | 90.9  | C13 H27 N6 O8     |
|          | 395.1880   | -0.7 | -1.8 | 5.5  | 95.3  | C12 H24 N10 O4 Na |
|          | 395.1866   | 0.7  | 1.8  | 0.5  | 106.1 | C11 H28 N6 O8 Na  |

Minimum: -1.5  
Maximum: 50.0

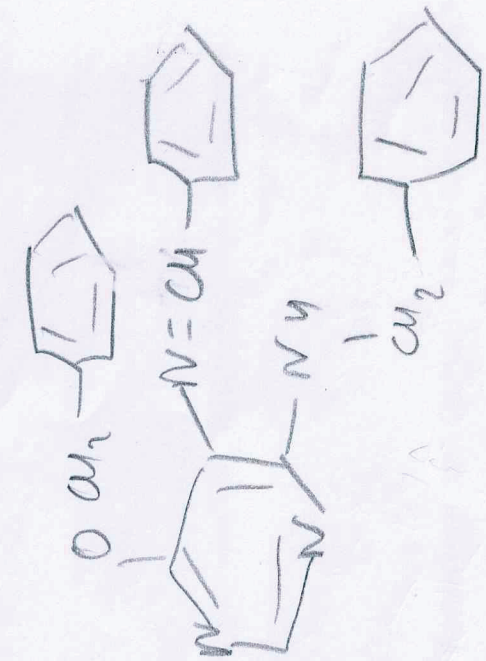

8 Jul 2013

|                               |                                                                           |                     |                 |                             |            |
|-------------------------------|---------------------------------------------------------------------------|---------------------|-----------------|-----------------------------|------------|
| <b>Acquisition Time (sec)</b> | 1.0486                                                                    | <b>Comment</b>      | new experiment  | <b>Date</b>                 | Jul 3 2013 |
| <b>File Name</b>              | C:\Users\usuario\Documents\Espectros 2ª Gen-Asier\13-15463 Benz-1\carbono |                     |                 |                             |            |
| <b>Frequency (MHz)</b>        | 125.68                                                                    | <b>Nucleus</b>      | <sup>13</sup> C | <b>Number of Transients</b> | 3200       |
| <b>Original Points Count</b>  | 32768                                                                     | <b>Points Count</b> | 32768           | <b>Pulse Sequence</b>       | s2pul      |
| <b>Solvent</b>                | CHLOROFORM-D                                                              |                     |                 | <b>Sweep Width (Hz)</b>     | 31250.00   |
| <b>Temperature (degree C)</b> | 25.000                                                                    |                     |                 |                             |            |

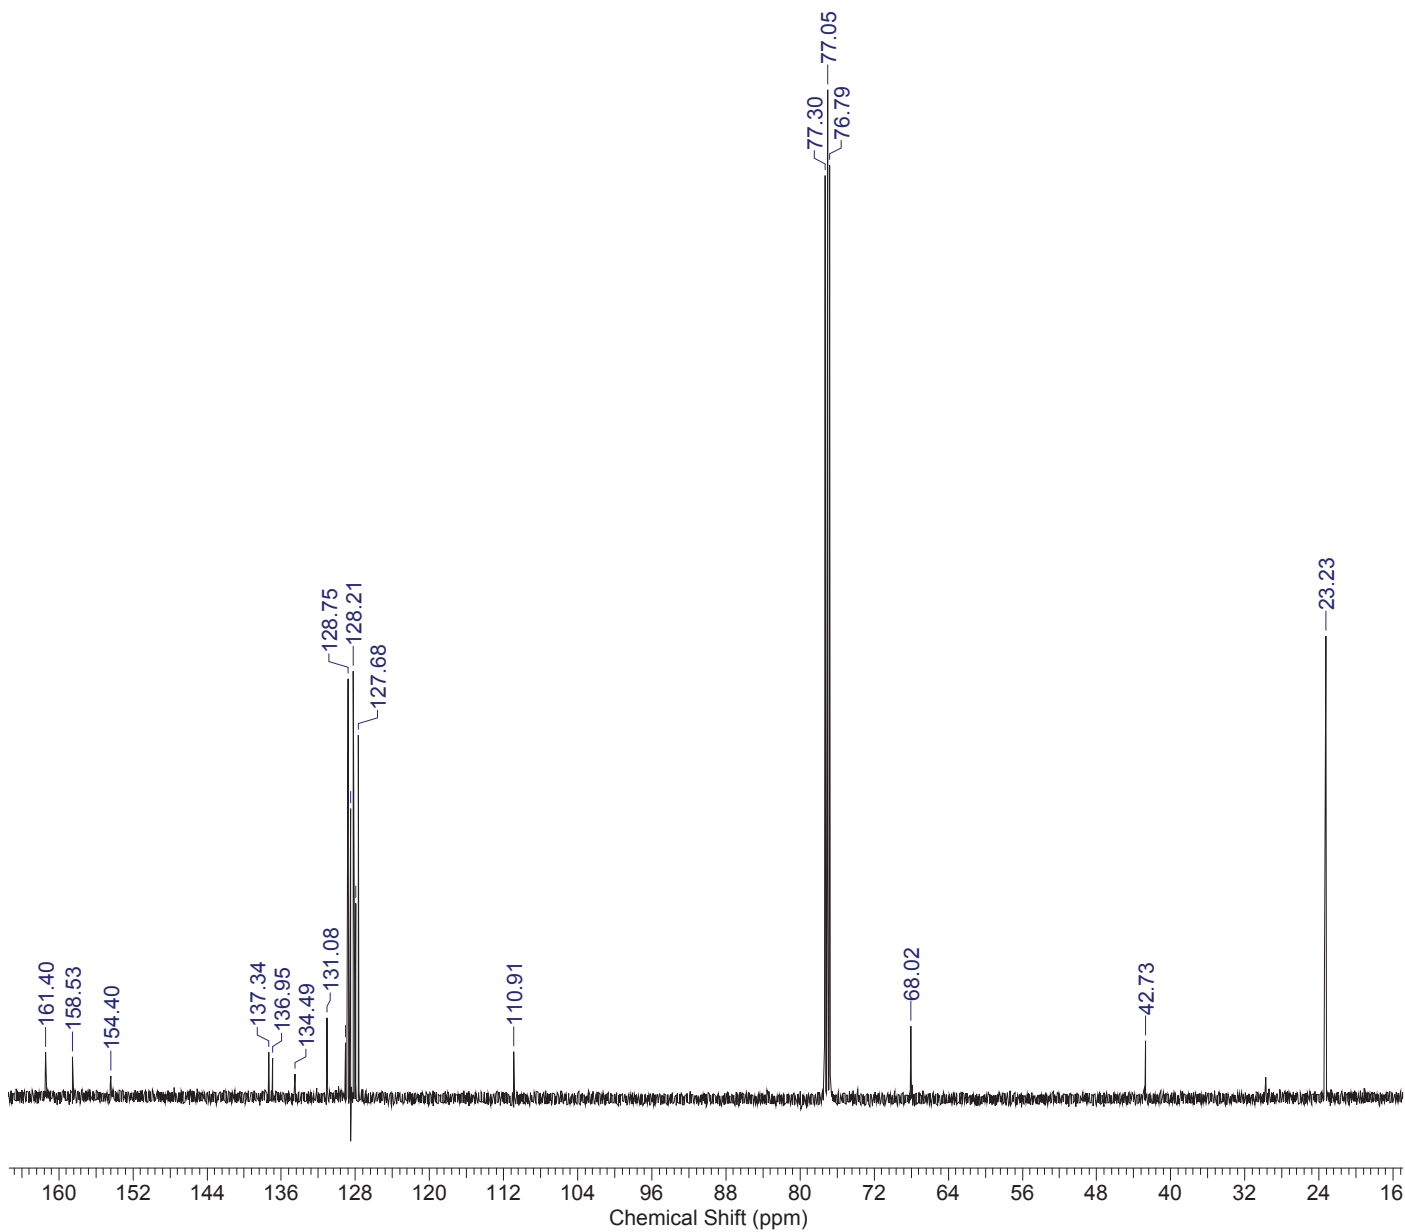

| No. | (ppm)  | (Hz)    | Height | No. | (ppm)  | (Hz)    | Height |
|-----|--------|---------|--------|-----|--------|---------|--------|
| 1   | 23.23  | 2919.2  | 0.4578 | 11  | 128.53 | 16154.6 | 0.2868 |
| 2   | 42.73  | 5371.1  | 0.0564 | 12  | 128.75 | 16182.3 | 0.4156 |
| 3   | 68.02  | 8548.9  | 0.0705 | 13  | 129.03 | 16217.6 | 0.0545 |
| 4   | 76.79  | 9651.3  | 0.9251 | 14  | 131.08 | 16474.1 | 0.0790 |
| 5   | 77.05  | 9683.8  | 1.0000 | 15  | 134.49 | 16903.3 | 0.0235 |
| 6   | 77.30  | 9715.2  | 0.9148 | 16  | 136.95 | 17212.3 | 0.0390 |
| 7   | 110.91 | 13939.2 | 0.0453 | 17  | 137.34 | 17260.9 | 0.0447 |
| 8   | 127.68 | 16047.8 | 0.3596 | 18  | 154.40 | 19405.8 | 0.0215 |
| 9   | 127.96 | 16082.2 | 0.1924 | 19  | 158.53 | 19924.6 | 0.0402 |
| 10  | 128.21 | 16113.6 | 0.4232 | 20  | 161.40 | 20285.1 | 0.0449 |

|                        |                                                                             |                  |             |
|------------------------|-----------------------------------------------------------------------------|------------------|-------------|
| Acquisition Time (sec) | 2.0447                                                                      | Date             | Jun 24 2013 |
| File Name              | C:\Users\usuario\Documents\Espectros 2ª Gen-Asier\13-15463_Benz-1\PROTON_01 |                  |             |
| Frequency (MHz)        | 499.79                                                                      | Nucleus          | 1H          |
| Original Points Count  | 16384                                                                       | Points Count     | 16384       |
| Solvent                | CHLOROFORM-D                                                                | Sweep Width (Hz) | 8012.82     |
| Temperature (degree C) | 25.000                                                                      |                  |             |

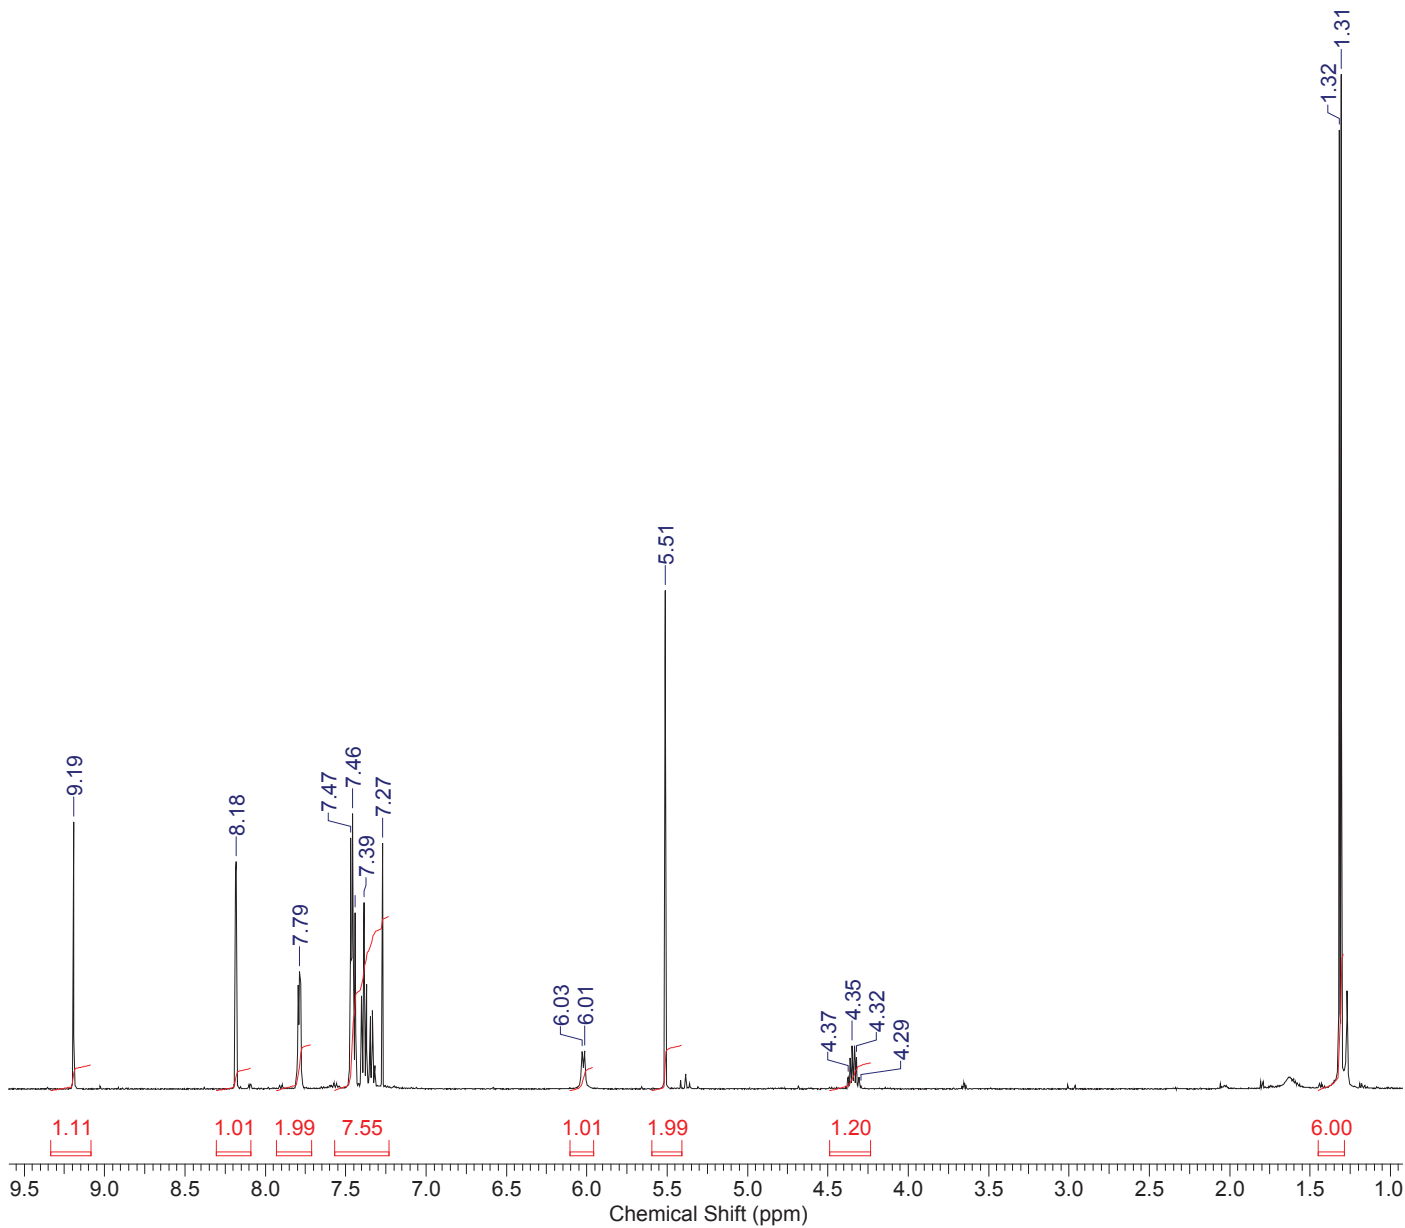

| No. | (ppm) | (Hz)   | Height |
|-----|-------|--------|--------|
| 1   | 1.31  | 652.2  | 1.0000 |
| 2   | 1.32  | 659.1  | 0.9448 |
| 3   | 4.29  | 2145.9 | 0.0044 |
| 4   | 4.32  | 2159.1 | 0.0327 |
| 5   | 4.35  | 2173.8 | 0.0440 |
| 6   | 4.37  | 2186.5 | 0.0131 |
| 7   | 5.51  | 2754.9 | 0.4921 |
| 8   | 6.01  | 3005.8 | 0.0392 |
| 9   | 6.03  | 3013.6 | 0.0388 |
| 10  | 7.27  | 3634.2 | 0.2440 |
| 11  | 7.39  | 3691.5 | 0.1852 |
| 12  | 7.44  | 3718.4 | 0.1749 |
| 13  | 7.46  | 3727.2 | 0.2726 |
| 14  | 7.46  | 3730.6 | 0.2329 |
| 15  | 7.47  | 3733.5 | 0.2488 |
| 16  | 7.79  | 3892.0 | 0.1170 |
| 17  | 8.18  | 4089.6 | 0.2253 |
| 18  | 9.19  | 4594.8 | 0.2644 |

| No. | (ppm)          | Value | Absolute Value |
|-----|----------------|-------|----------------|
| 1   | [1.29 .. 1.45] | 6.000 | 3.44717e+8     |
| 2   | [4.23 .. 4.49] | 1.202 | 6.90548e+7     |
| 3   | [5.41 .. 5.60] | 1.992 | 1.14457e+8     |
| 4   | [5.96 .. 6.11] | 1.009 | 5.79428e+7     |
| 5   | [7.23 .. 7.57] | 7.548 | 4.33660e+8     |
| 6   | [7.71 .. 7.93] | 1.991 | 1.14368e+8     |
| 7   | [8.09 .. 8.31] | 1.008 | 5.79299e+7     |
| 8   | [9.08 .. 9.33] | 1.110 | 6.37490e+7     |

Elemental Composition Report

Single Mass Analysis

Tolerance = 10.0 PPM / DBE: min = -1.5, max = 50.0  
 Element prediction: Off  
 Number of isotope peaks used for i-FIT = 3

Monoisotopic Mass, Even Electron Ions  
 215 formula(e) evaluated with 3 results within limits (up to 50 best isotopic matches for each mass)  
 Elements Used:  
 C: 0-21 H: 0-100 N: 0-5 O: 0-5 Na: 0-1

1: TOF MS ES+ 5.34e+002

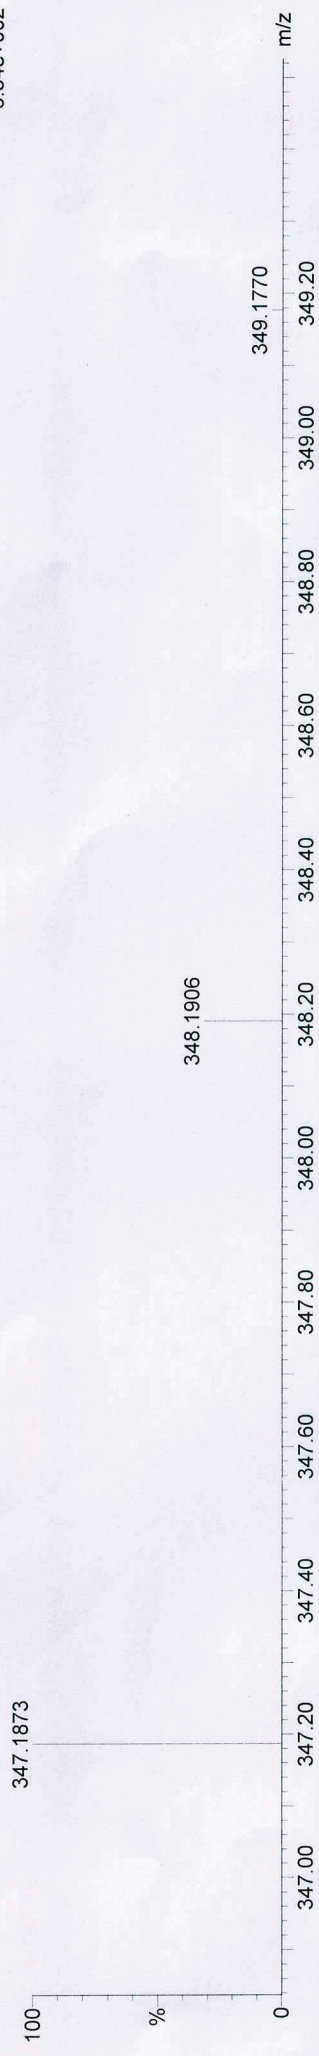

| Mass     | Calc. Mass | mDa | PPM | DBE  | i-FIT | Formula         |
|----------|------------|-----|-----|------|-------|-----------------|
| 347.1873 | 347.1872   | 0.1 | 0.3 | 12.5 | 3.2   | C21 H23 N4 O    |
| 347.1858 | 347.1858   | 1.5 | 4.3 | 7.5  | 5.6   | C20 H27 O5      |
| 347.1848 | 347.1848   | 2.5 | 7.2 | 9.5  | 6.4   | C19 H24 N4 O Na |

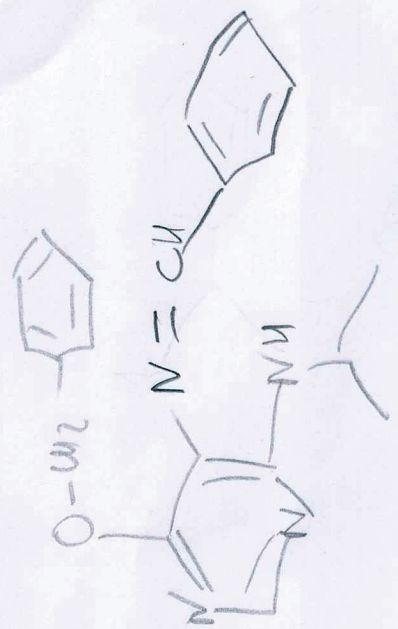

Minimum:  
Maximum:

**Elemental Composition Report**

**Single Mass Analysis**

Tolerance = 5.0 PPM / DBE: min = -1.5, max = 50.0  
 Element prediction: Off  
 Number of isotope peaks used for i-FIT = 3

Monoisotopic Mass, Even Electron Ions  
 960 formula(e) evaluated with 3 results within limits (up to 50 closest results for each mass)  
 Elements Used:

C: 0-17 H: 0-1000 N: 0-10 O: 0-10 Na: 0-1 S: 0-1 Cl: 0-1

PRE-TB-F dilu 9 (0.217)

1: TOF MS ES+

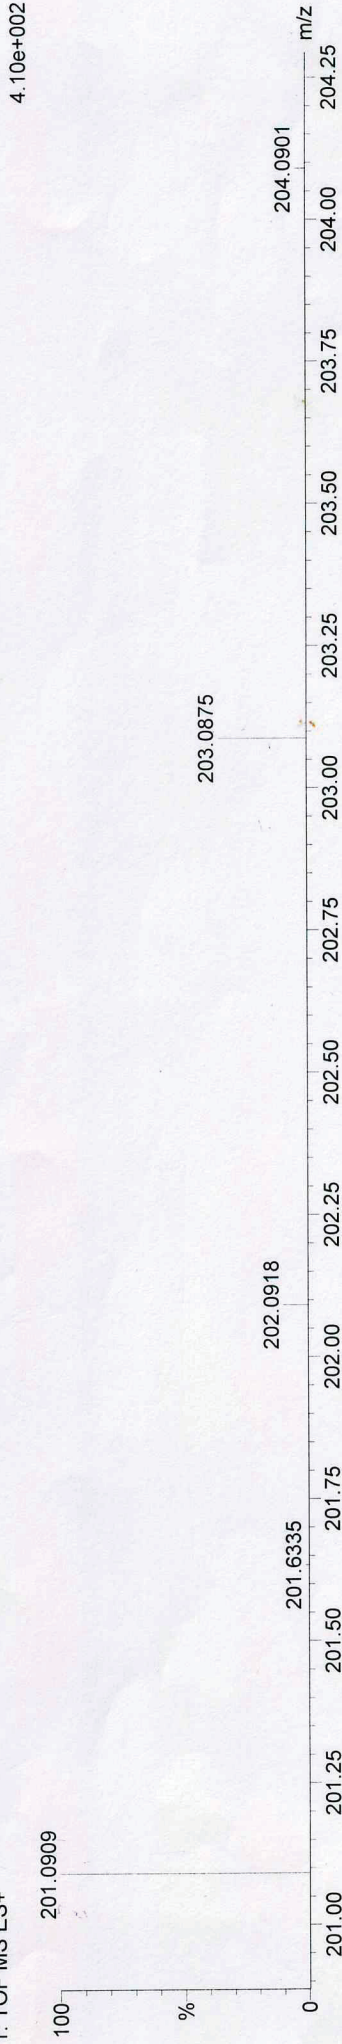

Minimum:  
 Maximum:

| Mass     | Calc. Mass | mDa  | PPM  | DBE  | i-FIT | Formula        |
|----------|------------|------|------|------|-------|----------------|
| 201.0909 | 201.0907   | 0.2  | 1.0  | 3.5  | 0.6   | C8 H14 N4 Cl   |
| 201.0909 | 201.0909   | 0.0  | 0.0  | -1.5 | 52.4  | C5 H17 N2 O4 S |
| 201.0916 | 201.0916   | -0.7 | -3.5 | 7.5  | 72.7  | C13 H13 O2     |

4.10e+002

18. 5-amino-4-tert-butylamino-6-chloropyrimidine (H-NMR)

2 Jul 2013

|                        |                                                     |                        |              |
|------------------------|-----------------------------------------------------|------------------------|--------------|
| Acquisition Time (sec) | 2.0447                                              | Date                   | Jun 19 2012  |
| File Name              | C:\Users\usuario\Documents\Espectros Asier\Pre-TB-1 | Frequency (MHz)        | 499.79       |
| Nucleus                | 1H                                                  | Number of Transients   | 1            |
| Points Count           | 16384                                               | Pulse Sequence         | s2pul        |
| Sweep Width (Hz)       | 8012.82                                             | Temperature (degree C) | 25.000       |
|                        |                                                     | Original Points Count  | 16384        |
|                        |                                                     | Solvent                | CHLOROFORM-D |

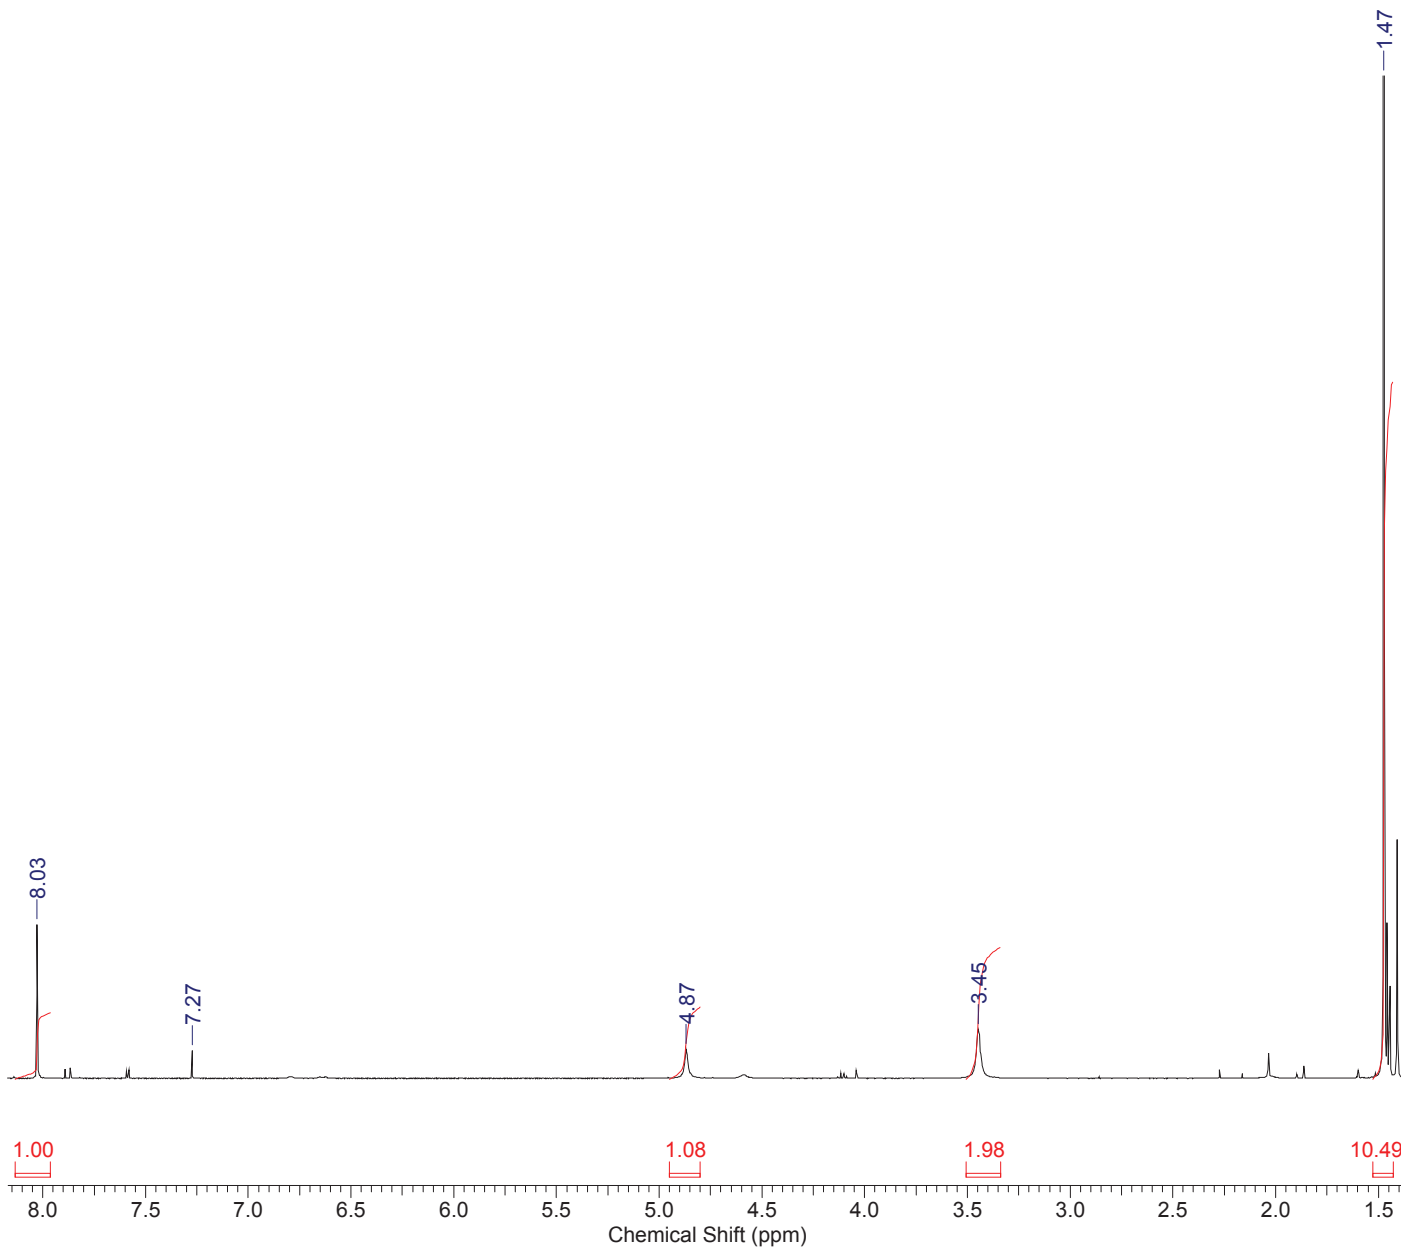

| No. | (ppm) | (Hz)   | Height |
|-----|-------|--------|--------|
| 1   | 1.47  | 736.5  | 1.0000 |
| 2   | 3.45  | 1722.5 | 0.0217 |
| 3   | 4.87  | 2433.1 | 0.0131 |
| 4   | 7.27  | 3635.3 | 0.0125 |
| 5   | 8.03  | 4011.9 | 0.0669 |

| No. | (ppm)          | Value  | Absolute Value |
|-----|----------------|--------|----------------|
| 1   | [1.43 .. 1.53] | 10.486 | 1.68216e+8     |
| 2   | [3.34 .. 3.51] | 1.981  | 3.17831e+7     |
| 3   | [4.80 .. 4.95] | 1.083  | 1.73672e+7     |
| 4   | [7.96 .. 8.14] | 1.000  | 1.60426e+7     |



**Elemental Composition Report**

**Single Mass Analysis**

Tolerance = 5.0 mDa / DBE: min = -1.5, max = 50.0  
 Element prediction: Off  
 Number of isotope peaks used for i-FIT = 3

Monoisotopic Mass, Even Electron Ions  
 44 formula(e) evaluated with 2 results within limits (up to 50 closest results for each mass)

Elements Used:  
 C: 0-16 H: 0-1000 N: 0-5 O: 0-1 Na: 0-1

ASIMJ-5 12-04 9 (0.212)

6.64e+002

1: TOF MS ES+

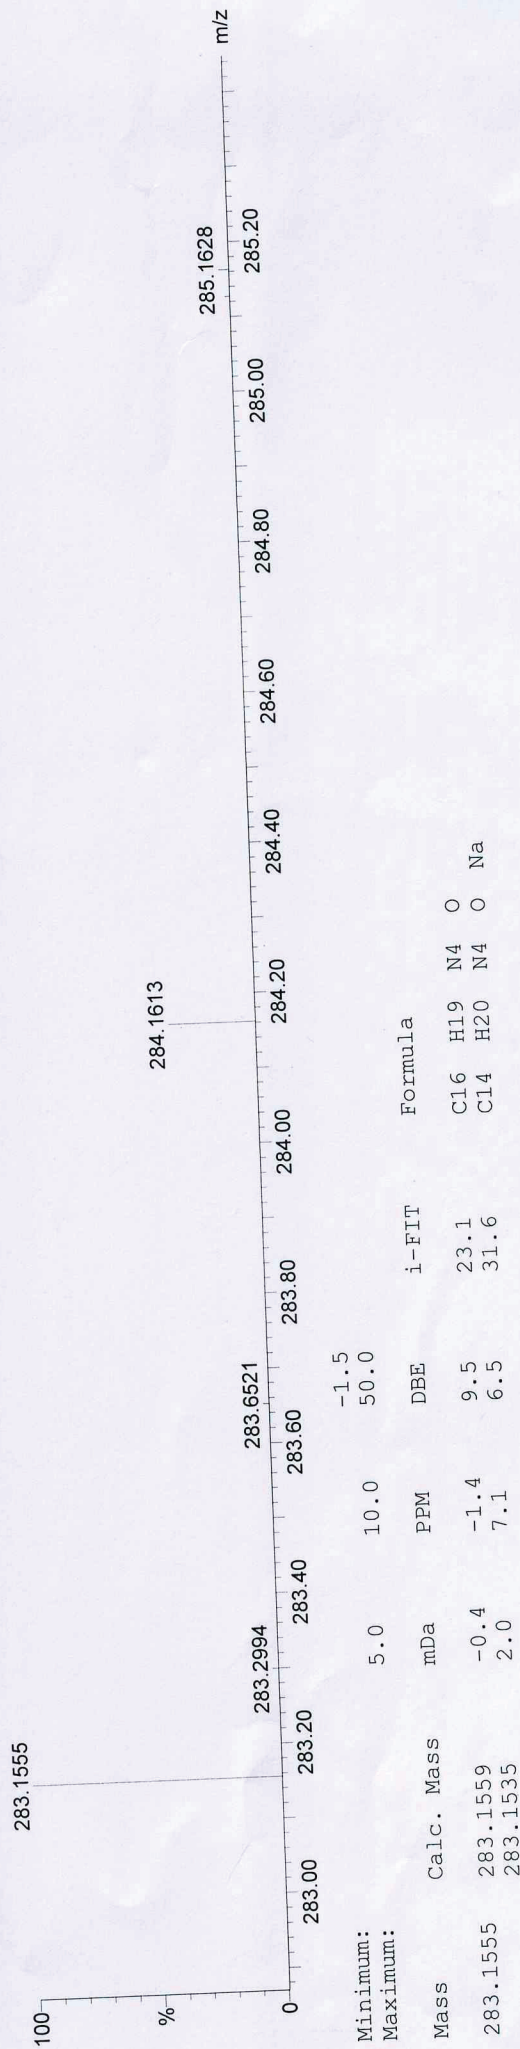

| Mass     | Calc. Mass | mDa  | PPM  | DBE | i-FIT | Formula         |
|----------|------------|------|------|-----|-------|-----------------|
| 283.1555 | 283.1559   | -0.4 | -1.4 | 9.5 | 23.1  | C16 H19 N4 O    |
| 283.1535 | 283.1535   | 2.0  | 7.1  | 6.5 | 31.6  | C14 H20 N4 O Na |

Minimum: -1.5  
 Maximum: 50.0

|                        |                                                                       |                  |             |                      |       |
|------------------------|-----------------------------------------------------------------------|------------------|-------------|----------------------|-------|
| Acquisition Time (sec) | 1.0486                                                                | Date             | Feb 22 2012 |                      |       |
| File Name              | C:\Users\usuario\Documents\Espectros Asier\RMN-158-12 ASIMJ-5\carbono |                  |             |                      |       |
| Frequency (MHz)        | 125.68                                                                | Nucleus          | 13C         | Number of Transients | 640   |
| Original Points Count  | 32768                                                                 | Points Count     | 32768       | Pulse Sequence       | s2pul |
| Solvent                | CHLOROFORM-D                                                          | Sweep Width (Hz) | 31250.00    |                      |       |
| Temperature (degree C) | 25.000                                                                |                  |             |                      |       |

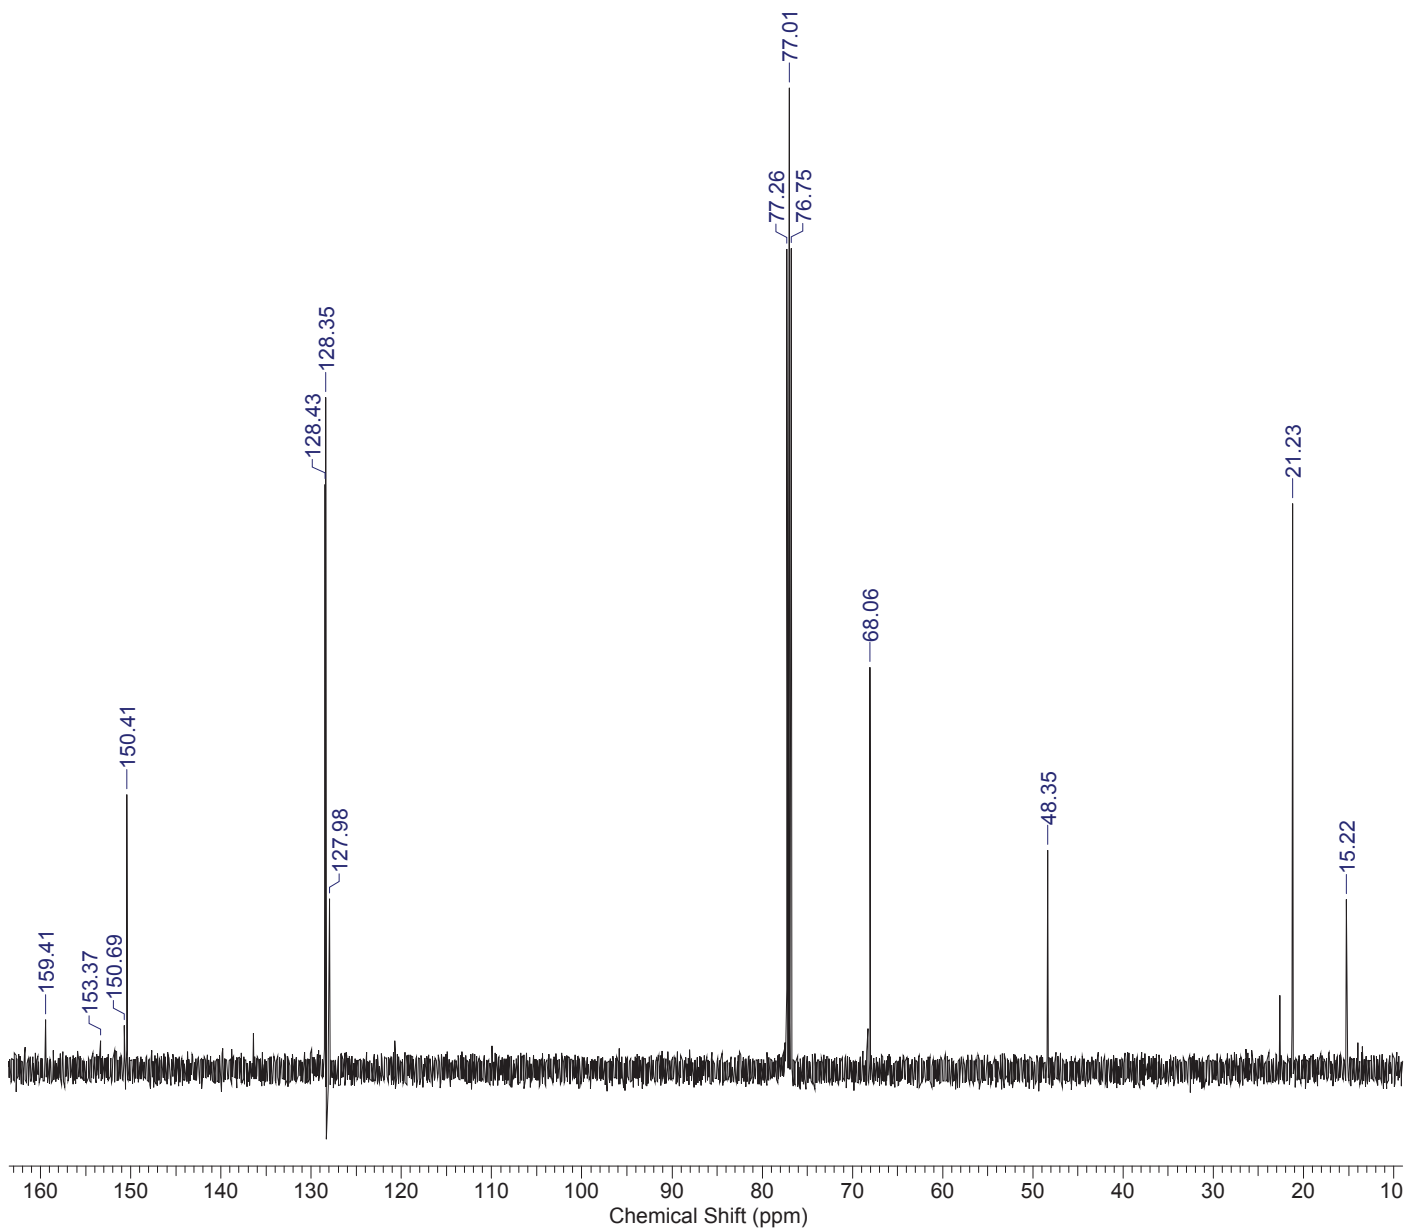

| No. | (ppm)  | (Hz)    | Height |
|-----|--------|---------|--------|
| 1   | 15.22  | 1913.4  | 0.1727 |
| 2   | 21.23  | 2667.8  | 0.5761 |
| 3   | 48.35  | 6077.3  | 0.2229 |
| 4   | 68.06  | 8554.1  | 0.4096 |
| 5   | 76.75  | 9646.1  | 0.8368 |
| 6   | 77.01  | 9678.5  | 1.0000 |
| 7   | 77.26  | 9710.0  | 0.8358 |
| 8   | 127.98 | 16085.5 | 0.1738 |
| 9   | 128.35 | 16132.2 | 0.6845 |
| 10  | 128.43 | 16141.7 | 0.5959 |
| 11  | 150.41 | 18903.7 | 0.2798 |
| 12  | 150.69 | 18939.9 | 0.0444 |
| 13  | 153.37 | 19276.6 | 0.0292 |
| 14  | 159.41 | 20035.7 | 0.0507 |

|                               |                                                                    |                     |                |                             |             |
|-------------------------------|--------------------------------------------------------------------|---------------------|----------------|-----------------------------|-------------|
| <b>Acquisition Time (sec)</b> | 1.0486                                                             | <b>Comment</b>      | new experiment | <b>Date</b>                 | Feb 22 2012 |
| <b>File Name</b>              | C:\Users\usuario\Documents\Espectros Asier\RMN-158-12 ASIMJ-5\dept |                     |                |                             |             |
| <b>Frequency (MHz)</b>        | 125.68                                                             | <b>Nucleus</b>      | 13C            | <b>Number of Transients</b> | 2400        |
| <b>Original Points Count</b>  | 32768                                                              | <b>Points Count</b> | 32768          | <b>Pulse Sequence</b>       | DEPT135     |
| <b>Solvent</b>                | CHLOROFORM-D                                                       |                     |                | <b>Sweep Width (Hz)</b>     | 31250.00    |
| <b>Temperature (degree C)</b> | 25.000                                                             |                     |                |                             |             |

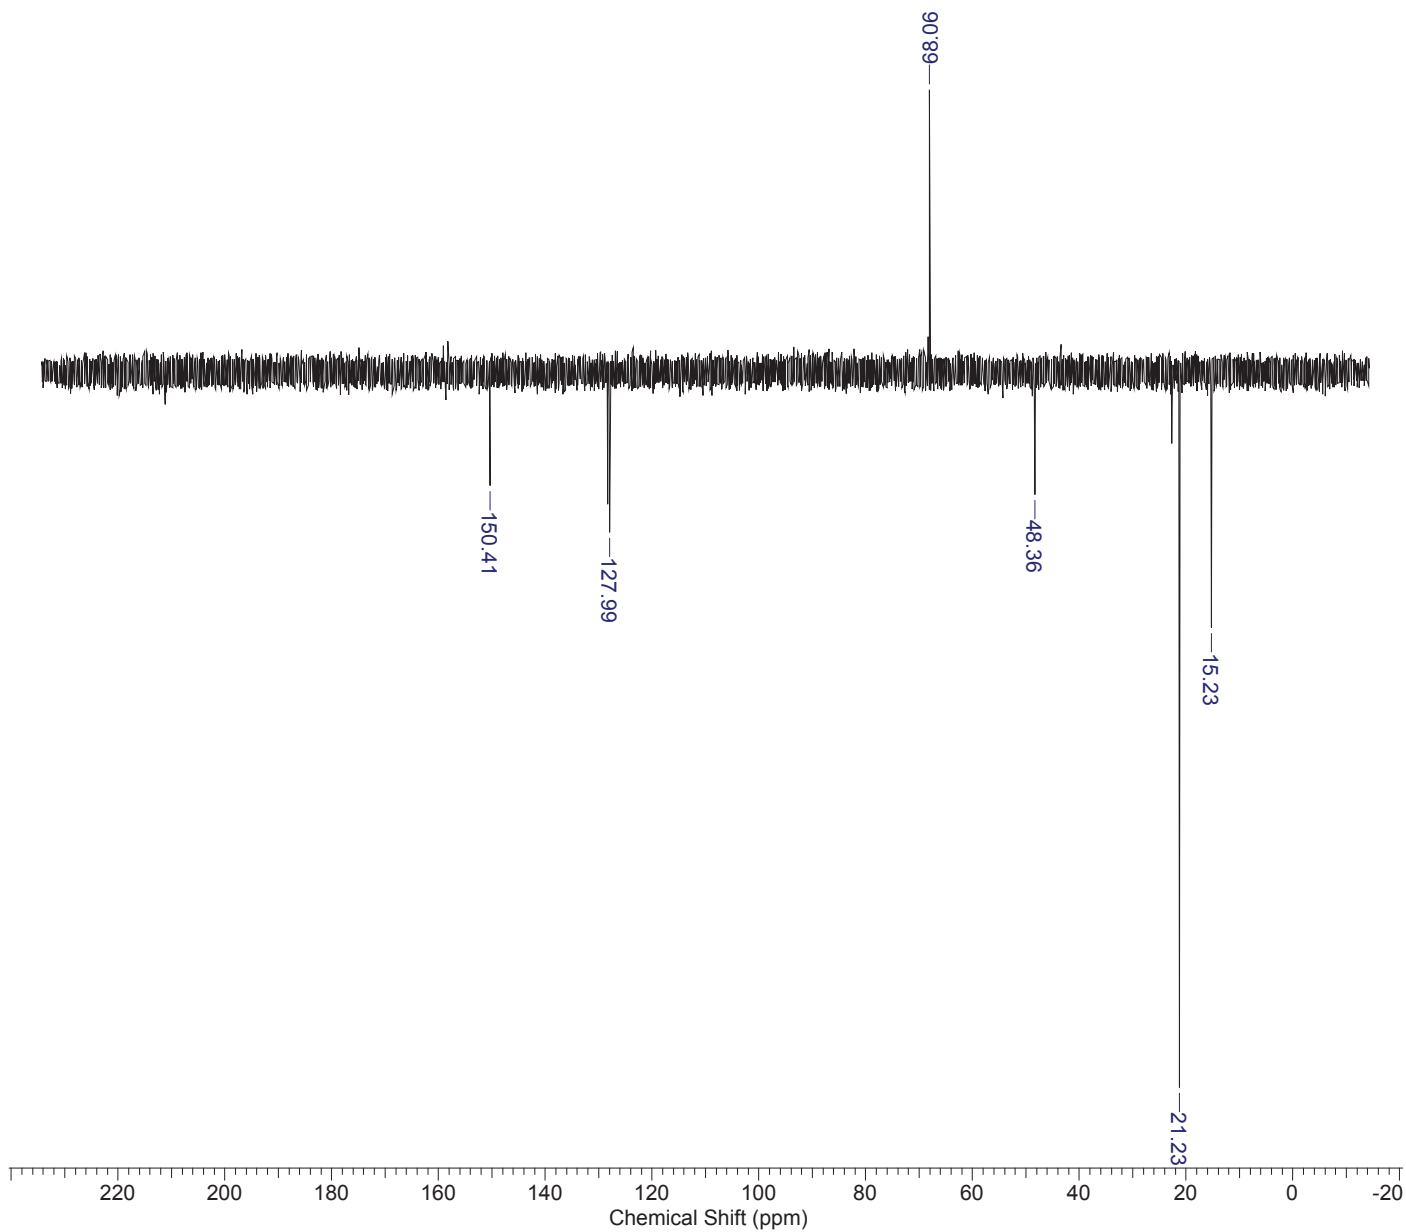

| No. | (ppm)  | (Hz)    | Height  |
|-----|--------|---------|---------|
| 1   | 15.23  | 1914.4  | -0.9040 |
| 2   | 21.23  | 2668.8  | -2.5316 |
| 3   | 48.36  | 6078.3  | -0.4334 |
| 4   | 68.06  | 8554.1  | 1.0000  |
| 5   | 127.99 | 16086.4 | -0.5665 |
| 6   | 150.41 | 18903.7 | -0.4006 |

|                        |                                                                      |                  |             |                      |       |
|------------------------|----------------------------------------------------------------------|------------------|-------------|----------------------|-------|
| Acquisition Time (sec) | 1.9923                                                               | Date             | Feb 22 2012 |                      |       |
| File Name              | C:\Users\usuario\Documents\Espectros Asier\RMN-158-12 ASIMJ-5\proton |                  |             |                      |       |
| Frequency (MHz)        | 499.79                                                               | Nucleus          | 1H          | Number of Transients | 1     |
| Original Points Count  | 15964                                                                | Points Count     | 16384       | Pulse Sequence       | s2pul |
| Solvent                | CHLOROFORM-D                                                         | Sweep Width (Hz) | 8012.82     |                      |       |
| Temperature (degree C) | 25.000                                                               |                  |             |                      |       |

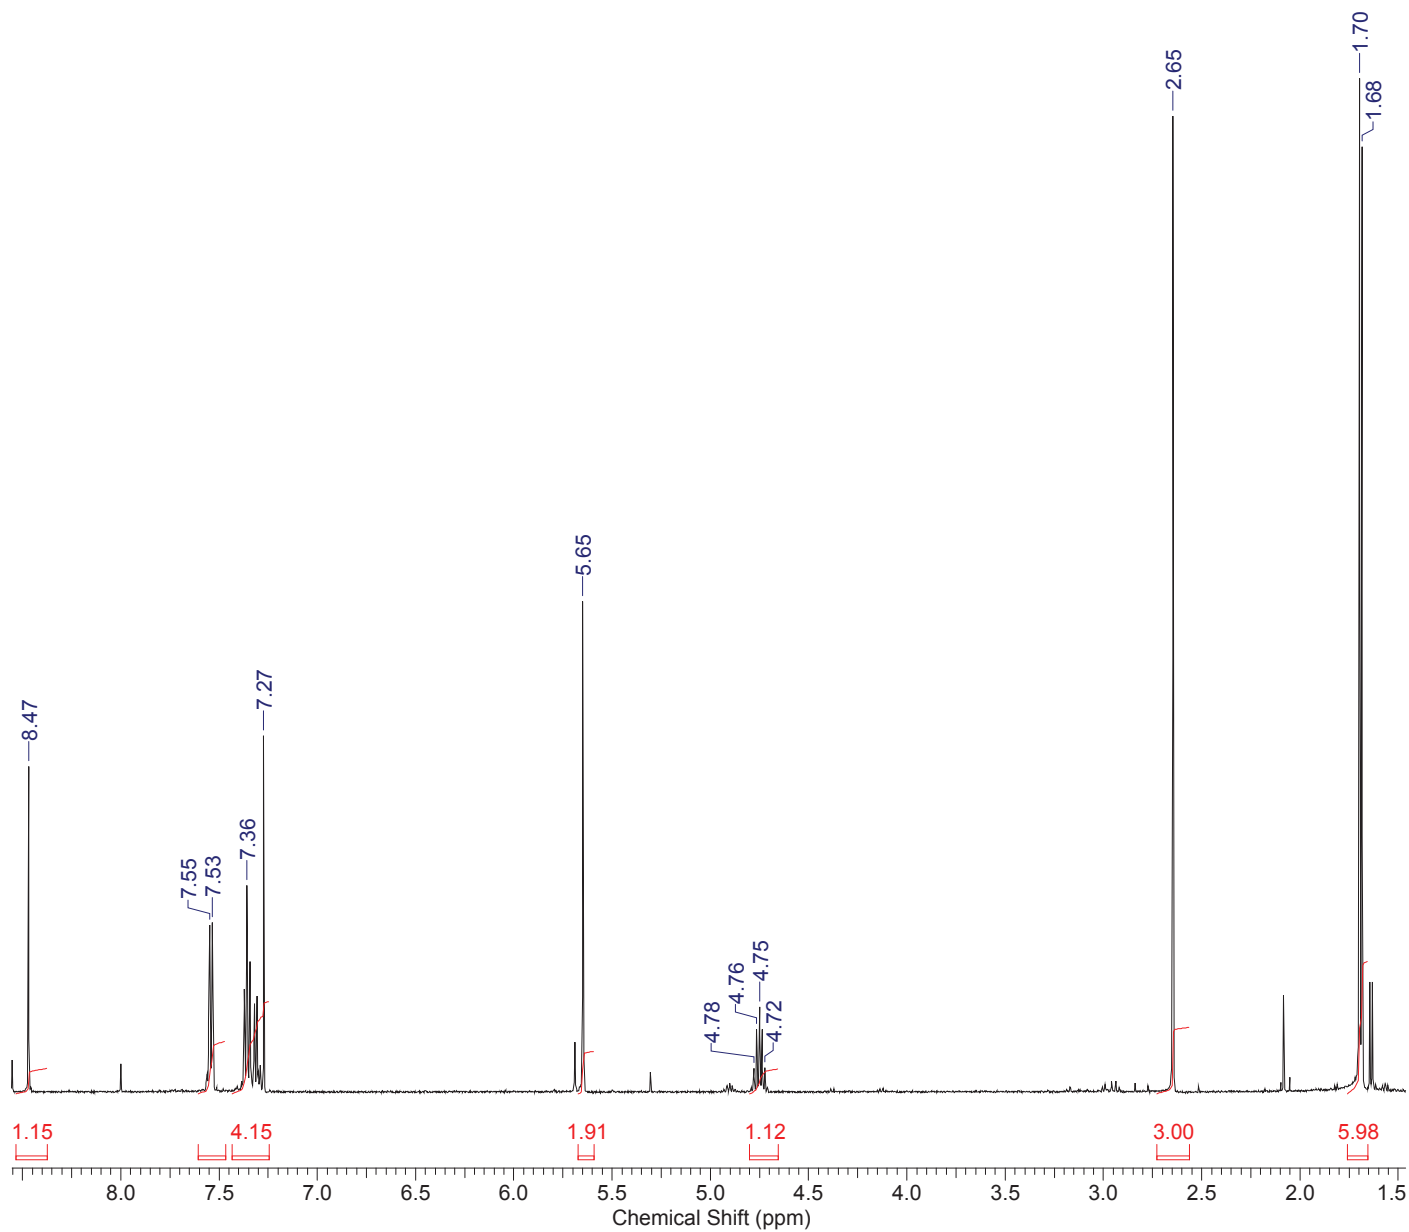

| No. | (ppm) | (Hz)   | Height |
|-----|-------|--------|--------|
| 1   | 1.68  | 841.9  | 0.9325 |
| 2   | 1.70  | 848.7  | 1.0000 |
| 3   | 2.65  | 1322.6 | 0.9626 |
| 4   | 4.72  | 2360.5 | 0.0255 |
| 5   | 4.75  | 2374.2 | 0.0857 |
| 6   | 4.76  | 2381.0 | 0.0634 |
| 7   | 4.78  | 2387.9 | 0.0253 |
| 8   | 5.65  | 2823.2 | 0.4849 |
| 9   | 7.27  | 3634.6 | 0.3526 |
| 10  | 7.36  | 3677.1 | 0.2053 |
| 11  | 7.53  | 3765.2 | 0.1687 |
| 12  | 7.55  | 3772.0 | 0.1659 |
| 13  | 8.47  | 4232.7 | 0.3220 |

| No. | (ppm)          | Value | Absolute Value |
|-----|----------------|-------|----------------|
| 1   | [1.66 .. 1.76] | 5.985 | 2.44828e+6     |
| 2   | [2.56 .. 2.73] | 3.000 | 1.22724e+6     |
| 3   | [4.65 .. 4.80] | 1.124 | 4.59616e+5     |
| 4   | [5.59 .. 5.67] | 1.908 | 7.80710e+5     |
| 5   | [7.25 .. 7.43] | 4.154 | 1.69922e+6     |
| 6   | [7.47 .. 7.61] | 2.360 | 9.65603e+5     |
| 7   | [8.37 .. 8.53] | 1.147 | 4.69248e+5     |

**Single Mass Analysis**

Tolerance = 5.0 PPM / DBE: min = -1.5, max = 50.0

Element prediction: Off

Number of isotope peaks used for i-FIT = 3

Monoisotopic Mass, Even Electron Ions

525 formula(e) evaluated with 4 results within limits (up to 50 best isotopic matches for each mass)

Elements Used:

C: 0-22 H: 0-1000 N: 0-5 O: 0-6 F: 0-3

12/3293

ASIMJ-5 9 (0.217)

1: TOF MS ES+  
9.28e+001

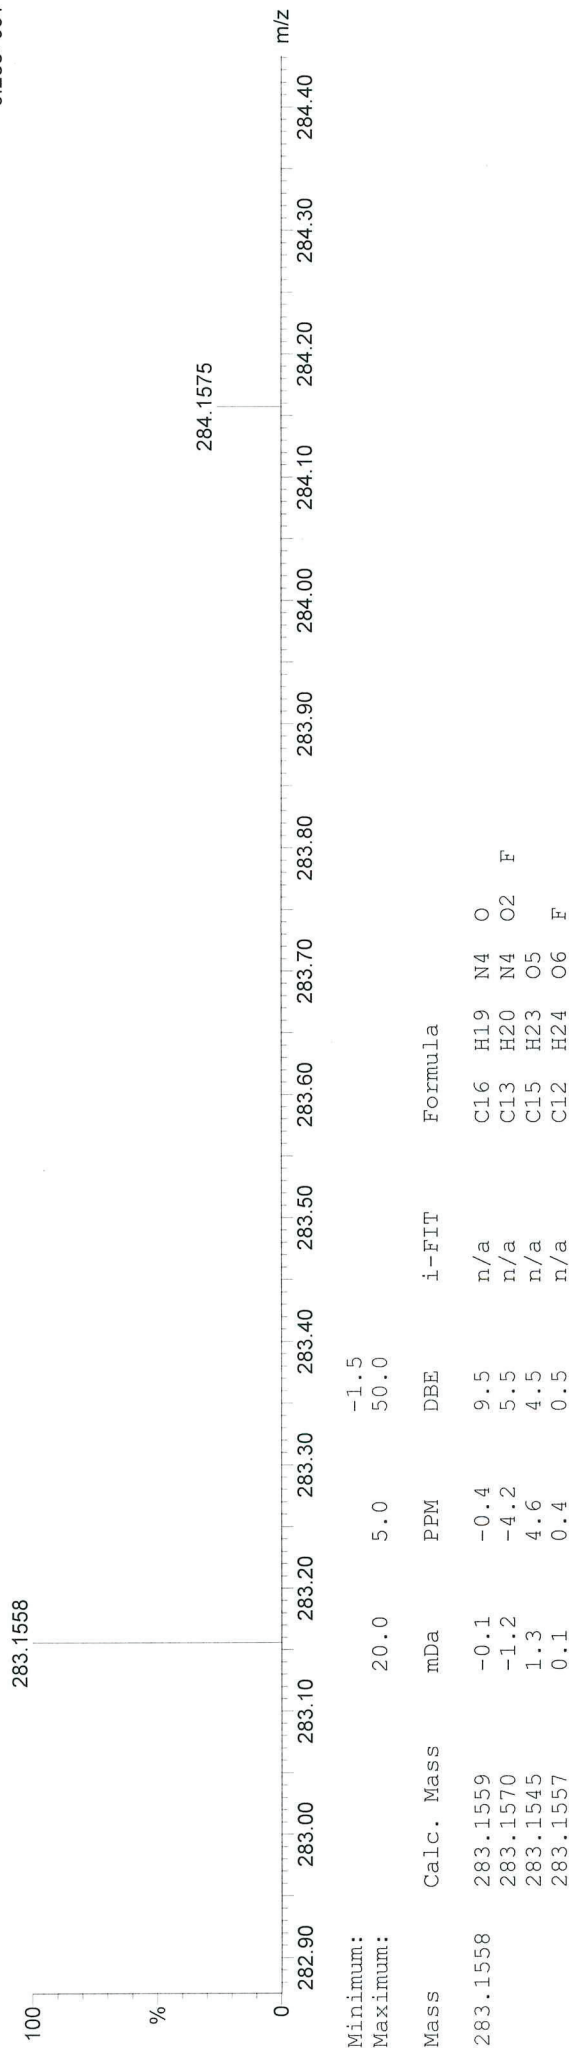

|                        |                                                        |              |          |                      |            |
|------------------------|--------------------------------------------------------|--------------|----------|----------------------|------------|
| Acquisition Time (sec) | 2.0484                                                 | Comment      | ASI-MJ-2 | Date                 | Feb 6 2012 |
| File Name              | C:\Users\usuario\Documents\Espectros Asier\1H-ASI-MJ-2 |              |          |                      |            |
| Frequency (MHz)        | 300.20                                                 | Nucleus      | 1H       | Number of Transients | 64         |
| Original Points Count  | 7379                                                   | Points Count | 8192     | Pulse Sequence       | s2pul      |
| Solvent                | CHLOROFORM-D                                           |              |          | Sweep Width (Hz)     | 3602.31    |
| Temperature (degree C) | 30.000                                                 |              |          |                      |            |

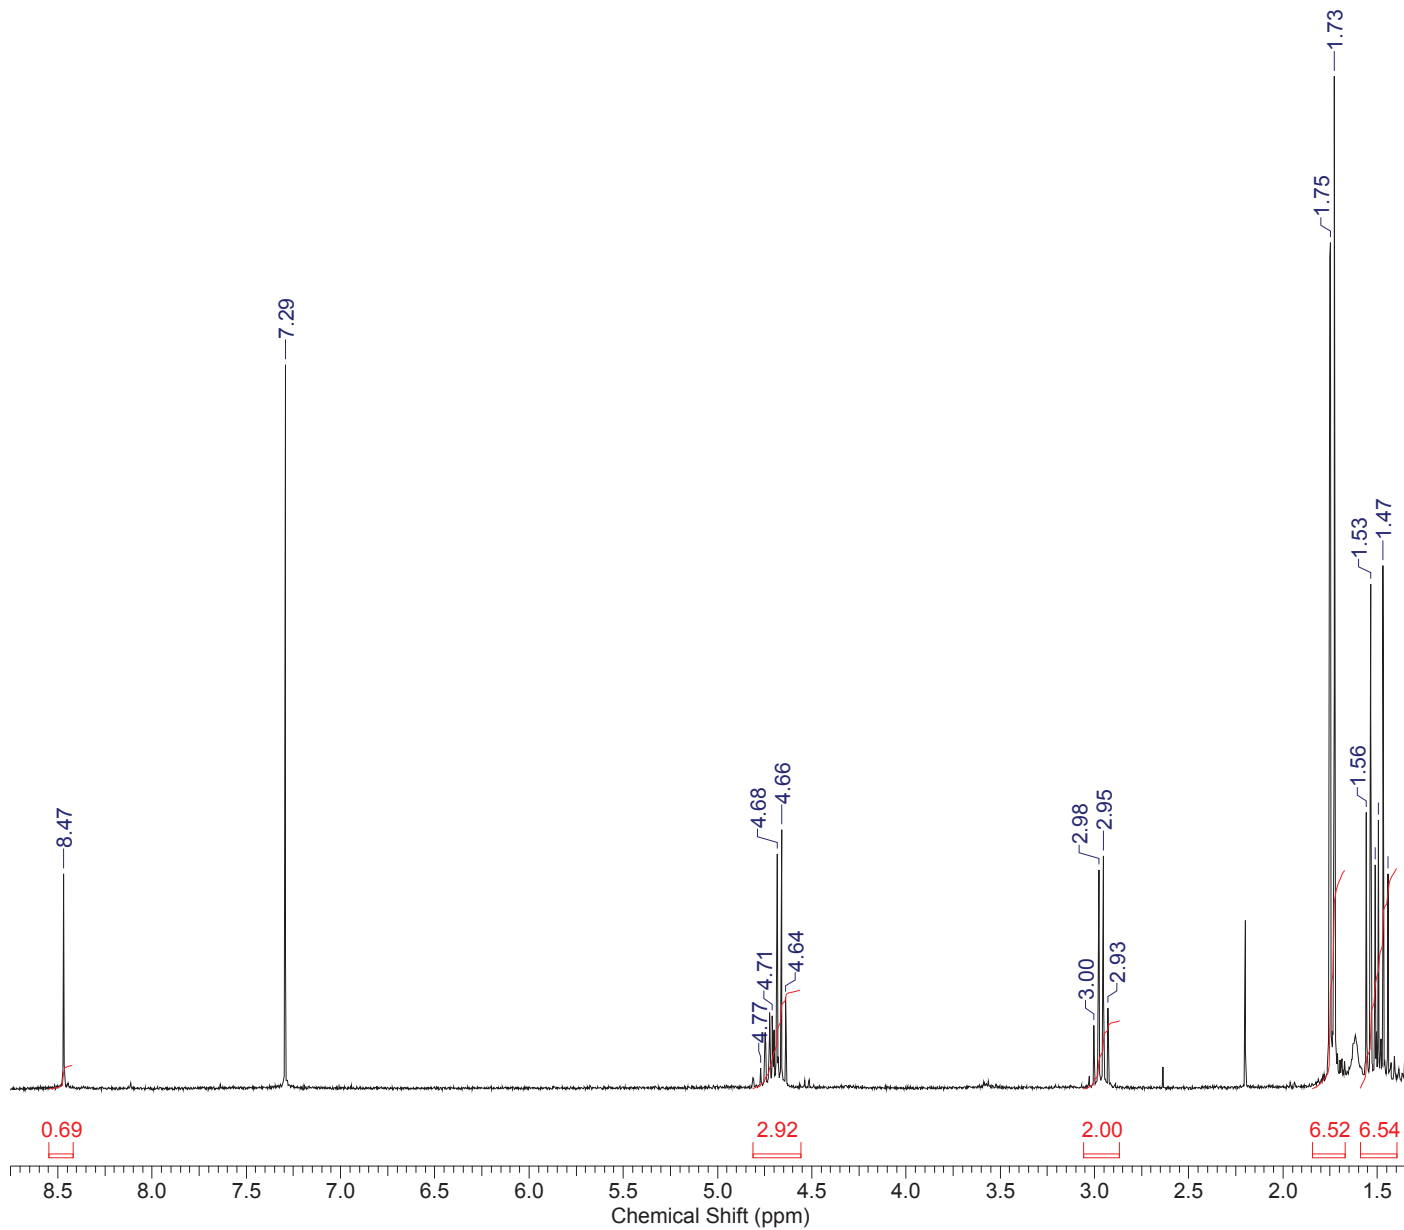

| No. | (ppm) | (Hz)  | Height |
|-----|-------|-------|--------|
| 1   | 1.44  | 433.4 | 0.2121 |
| 2   | 1.47  | 440.9 | 0.5167 |
| 3   | 1.49  | 448.4 | 0.2655 |
| 4   | 1.51  | 453.2 | 0.2214 |
| 5   | 1.53  | 460.7 | 0.4987 |
| 6   | 1.56  | 467.7 | 0.2730 |
| 7   | 1.73  | 518.7 | 1.0000 |
| 8   | 1.75  | 525.3 | 0.8356 |
| 9   | 2.93  | 878.9 | 0.0799 |
| 10  | 2.95  | 886.4 | 0.2303 |

| No. | (ppm) | (Hz)   | Height |
|-----|-------|--------|--------|
| 11  | 2.98  | 893.9  | 0.2163 |
| 12  | 3.00  | 901.3  | 0.0624 |
| 13  | 4.64  | 1392.1 | 0.0903 |
| 14  | 4.66  | 1399.2 | 0.2558 |
| 15  | 4.68  | 1406.2 | 0.2320 |
| 16  | 4.71  | 1413.7 | 0.0724 |
| 17  | 4.77  | 1432.2 | 0.0207 |
| 18  | 7.29  | 2189.5 | 0.7151 |
| 19  | 8.47  | 2542.2 | 0.2124 |

| No. | (ppm)          | Value | Absolute Value |
|-----|----------------|-------|----------------|
| 1   | [1.39 .. 1.59] | 6.536 | 2.20237e+8     |
| 2   | [1.67 .. 1.84] | 6.517 | 2.19591e+8     |
| 3   | [2.87 .. 3.06] | 2.000 | 6.73878e+7     |
| 4   | [4.56 .. 4.81] | 2.918 | 9.83286e+7     |
| 5   | [8.42 .. 8.55] | 0.693 | 2.33543e+7     |

**Single Mass Analysis**

Tolerance = 5.0 PPM / DBE: min = -1.5, max = 50.0  
 Element prediction: Off  
 Number of isotope peaks used for i-FIT = 3

Monoisotopic Mass, Even Electron Ions  
 427 formula(e) evaluated with 2 results within limits (up to 50 best isotopic matches for each mass)  
 Elements Used:

C: 0-22 H: 0-1000 N: 0-5 O: 0-6 F: 0-3

12/3290

1: TOF MS ES+  
 5.80e+002

ASIMJ-2 9 (0.217)

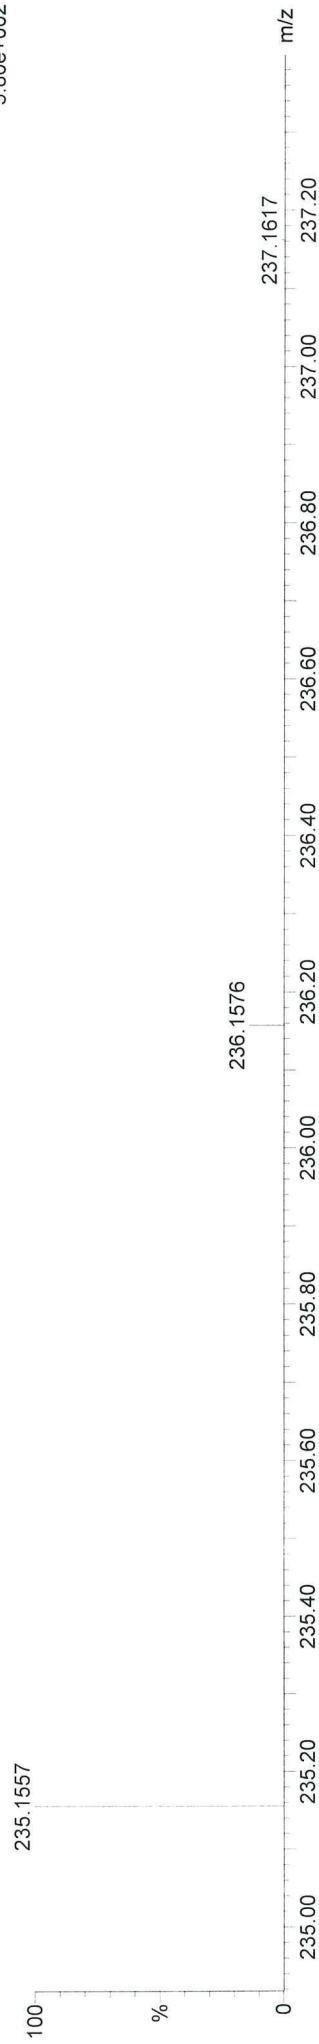

Minimum: -1.5  
 Maximum: 50.0

| Mass     | Calc. Mass | mDa  | PPM  | DBE | i-FIT | Formula      |
|----------|------------|------|------|-----|-------|--------------|
| 235.1557 | 235.1559   | -0.2 | -0.9 | 5.5 | 0.3   | C12 H19 N4 O |
|          | 235.1545   | 1.2  | 5.1  | 0.5 | 1.0   | C11 H23 O5   |

|                               |                                                                      |                     |                         |                             |         |
|-------------------------------|----------------------------------------------------------------------|---------------------|-------------------------|-----------------------------|---------|
| <b>Acquisition Time (sec)</b> | 1.0486                                                               | <b>Date</b>         | Feb 4 2012              |                             |         |
| <b>File Name</b>              | C:\Users\usuario\Documents\Espectros Asier\RMN-99-12_ASIMJ-1\DEPT_01 |                     |                         |                             |         |
| <b>Frequency (MHz)</b>        | 125.68                                                               | <b>Nucleus</b>      | 13C                     | <b>Number of Transients</b> | 1200    |
| <b>Original Points Count</b>  | 32768                                                                | <b>Points Count</b> | 32768                   | <b>Pulse Sequence</b>       | DEPT135 |
| <b>Solvent</b>                | CHLOROFORM-D                                                         |                     | <b>Sweep Width (Hz)</b> | 31250.00                    |         |
| <b>Temperature (degree C)</b> | 25.000                                                               |                     |                         |                             |         |

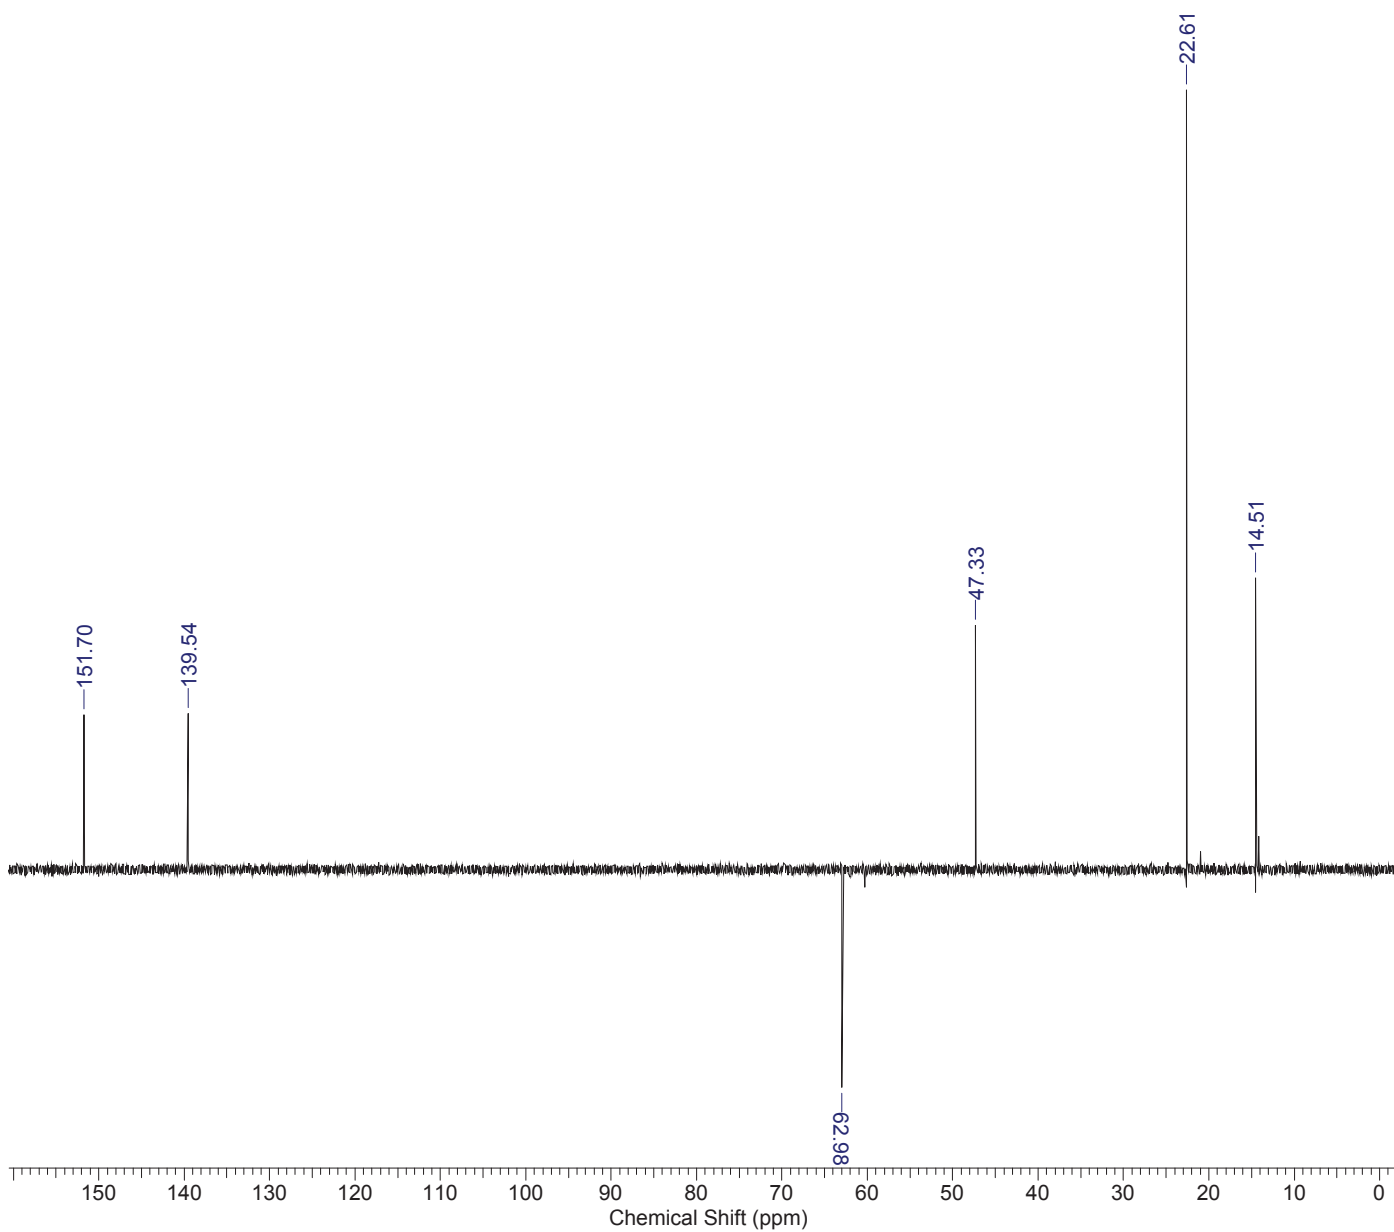

| No. | (ppm)  | (Hz)    | Height  |
|-----|--------|---------|---------|
| 1   | 14.51  | 1823.8  | 0.3743  |
| 2   | 22.61  | 2841.4  | 1.0000  |
| 3   | 47.33  | 5948.6  | 0.3133  |
| 4   | 62.98  | 7915.1  | -0.2795 |
| 5   | 139.54 | 17538.0 | 0.2003  |
| 6   | 151.70 | 19066.8 | 0.1987  |



|                        |                                                                        |                  |            |                      |       |
|------------------------|------------------------------------------------------------------------|------------------|------------|----------------------|-------|
| Acquisition Time (sec) | 2.0447                                                                 | Date             | Feb 4 2012 |                      |       |
| File Name              | C:\Users\usuario\Documents\Espectros Asier\RMN-99-12 ASIMJ-1\PROTON_01 |                  |            |                      |       |
| Frequency (MHz)        | 499.79                                                                 | Nucleus          | 1H         | Number of Transients | 8     |
| Original Points Count  | 16384                                                                  | Points Count     | 16384      | Pulse Sequence       | s2pul |
| Solvent                | CHLOROFORM-D                                                           | Sweep Width (Hz) | 8012.82    |                      |       |
| Temperature (degree C) | 25.000                                                                 |                  |            |                      |       |

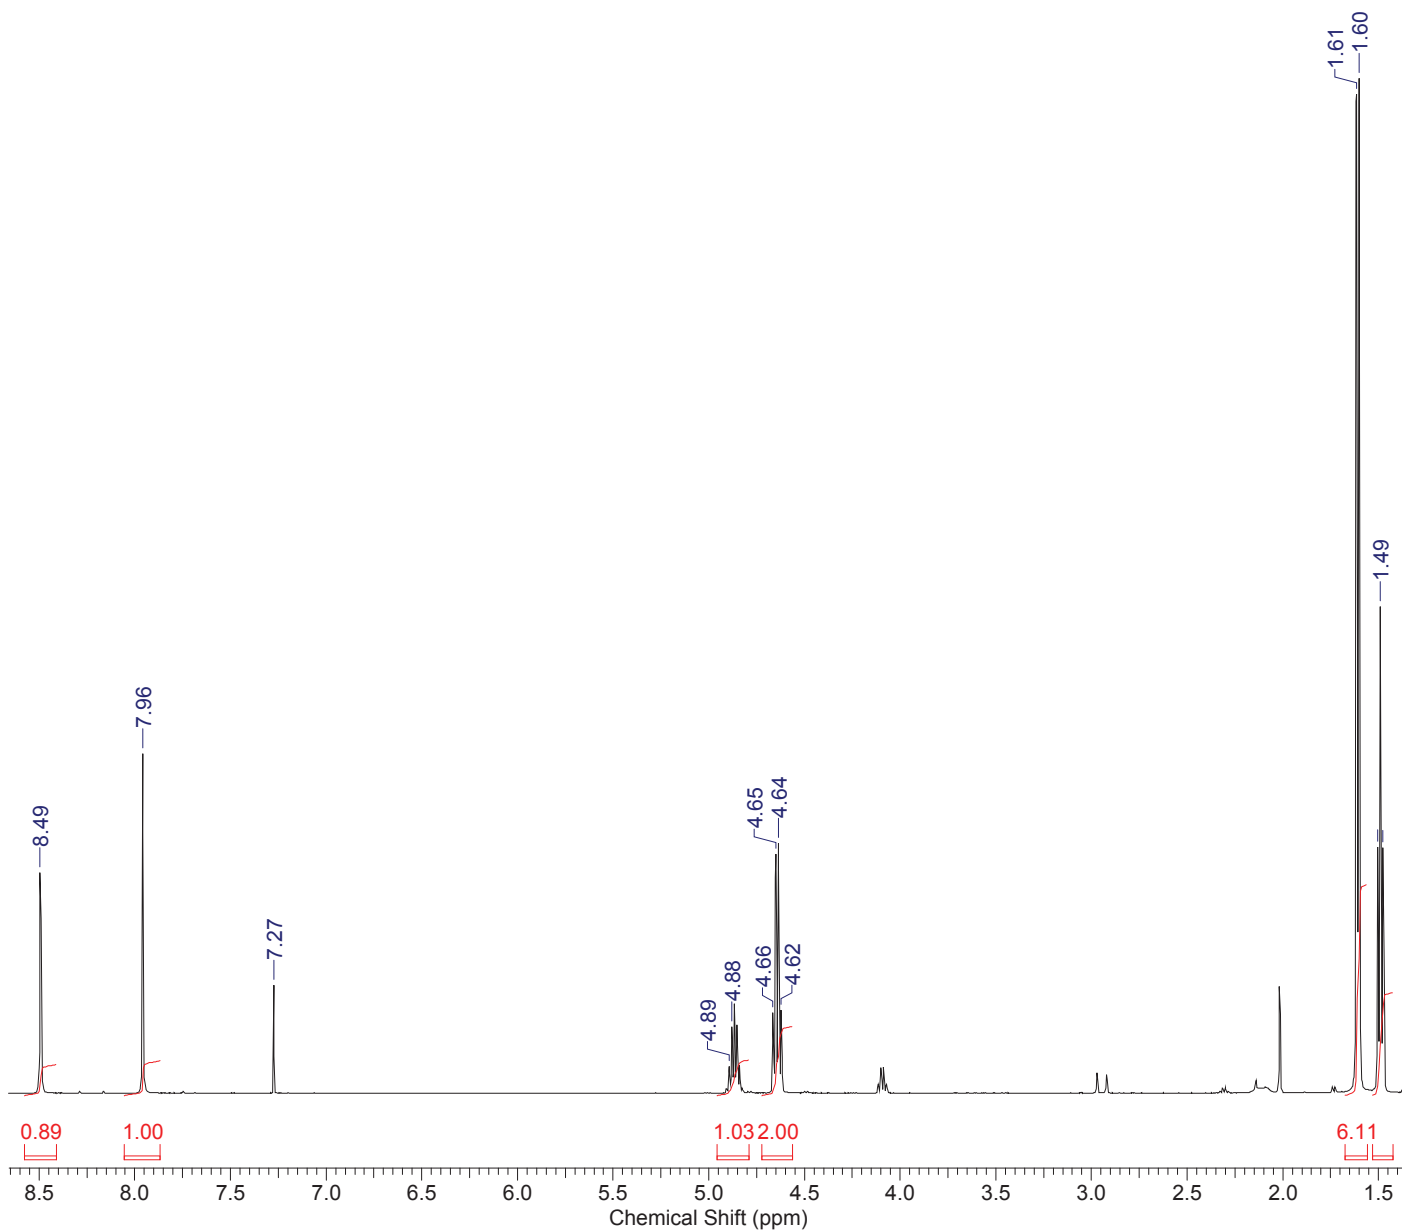

| No. | (ppm) | (Hz)   | Height |
|-----|-------|--------|--------|
| 1   | 1.48  | 738.3  | 0.2434 |
| 2   | 1.49  | 745.2  | 0.4809 |
| 3   | 1.51  | 752.5  | 0.2440 |
| 4   | 1.60  | 800.9  | 1.0000 |
| 5   | 1.61  | 806.8  | 0.9840 |
| 6   | 4.62  | 2309.8 | 0.0837 |
| 7   | 4.64  | 2317.1 | 0.2483 |
| 8   | 4.65  | 2323.5 | 0.2373 |
| 9   | 4.66  | 2331.3 | 0.0814 |
| 10  | 4.88  | 2439.4 | 0.0676 |
| 11  | 4.89  | 2446.2 | 0.0283 |
| 12  | 7.27  | 3635.2 | 0.1085 |
| 13  | 7.96  | 3977.6 | 0.3363 |
| 14  | 8.49  | 4245.6 | 0.2190 |

| No. | (ppm)          | Value | Absolute Value |
|-----|----------------|-------|----------------|
| 1   | [1.42 .. 1.53] | 2.979 | 1.74678e+8     |
| 2   | [1.56 .. 1.67] | 6.113 | 3.58379e+8     |
| 3   | [4.56 .. 4.72] | 2.000 | 1.17260e+8     |
| 4   | [4.79 .. 4.96] | 1.030 | 6.03864e+7     |
| 5   | [7.87 .. 8.06] | 1.002 | 5.87716e+7     |
| 6   | [8.41 .. 8.58] | 0.894 | 5.24249e+7     |

**Single Mass Analysis**

Tolerance = 5.0 PPM / DBE: min = -1.5, max = 50.0

Element prediction: Off

Number of isotope peaks used for i-FIT = 3

Monoisotopic Mass, Even Electron Ions

369 formula(e) evaluated with 1 results within limits (up to 50 best isotopic matches for each mass)

Elements Used:

C: 0-22 H: 0-1000 N: 0-5 O: 0-6 F: 0-3

12/3289

ASIMJ-1 40 (0.885)

1: TOF MS ES+  
1.90e+002

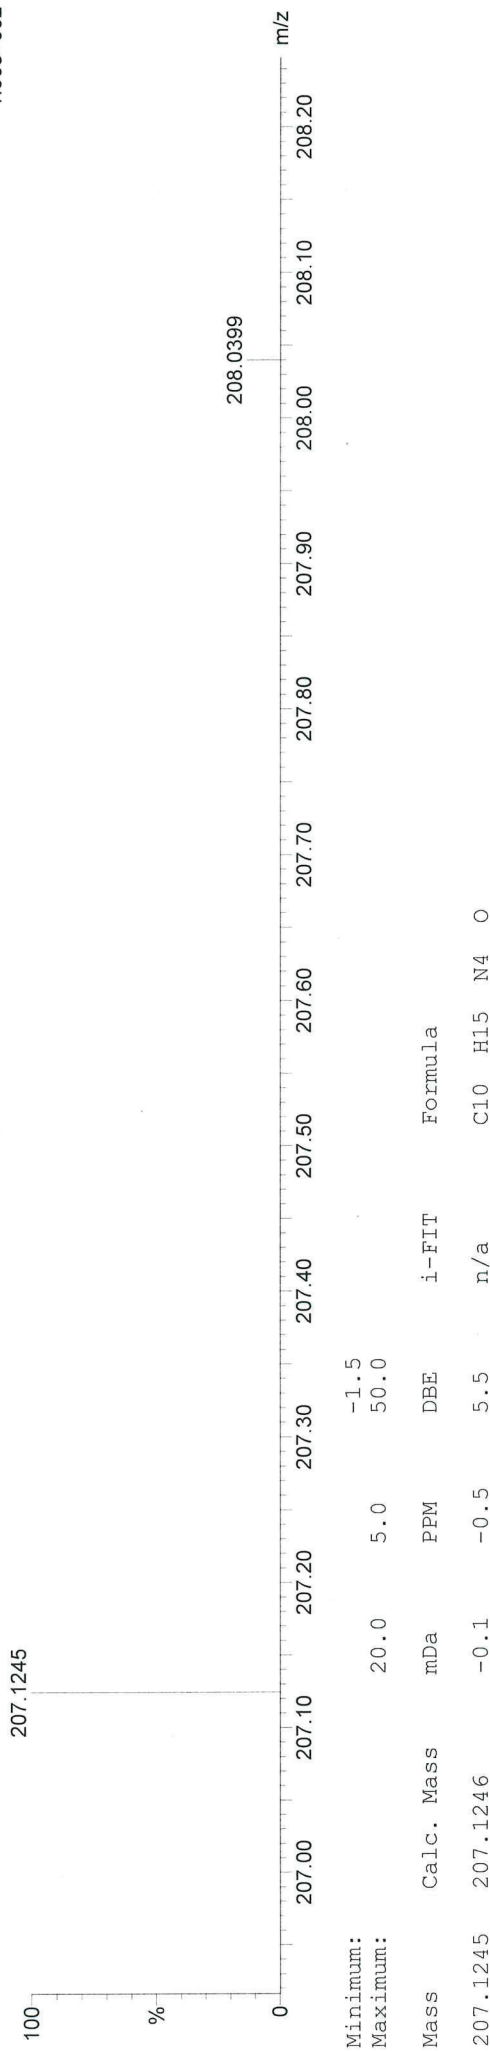

Minimum:  
Maximum:

-1.5  
50.0

Mass Calc. Mass mDa DBE i-FIT Formula

|                               |                                                                        |                         |            |                             |       |
|-------------------------------|------------------------------------------------------------------------|-------------------------|------------|-----------------------------|-------|
| <b>Acquisition Time (sec)</b> | 1.0486                                                                 | <b>Date</b>             | Feb 4 2012 |                             |       |
| <b>File Name</b>              | C:\Users\usuario\Documents\Espectros Asier\RMN-99-12_ASIMJ-1\CARBON_01 |                         |            |                             |       |
| <b>Frequency (MHz)</b>        | 125.68                                                                 | <b>Nucleus</b>          | 13C        | <b>Number of Transients</b> | 3200  |
| <b>Original Points Count</b>  | 32768                                                                  | <b>Points Count</b>     | 32768      | <b>Pulse Sequence</b>       | s2pul |
| <b>Solvent</b>                | CHLOROFORM-D                                                           | <b>Sweep Width (Hz)</b> | 31250.00   |                             |       |
| <b>Temperature (degree C)</b> | 25.000                                                                 |                         |            |                             |       |

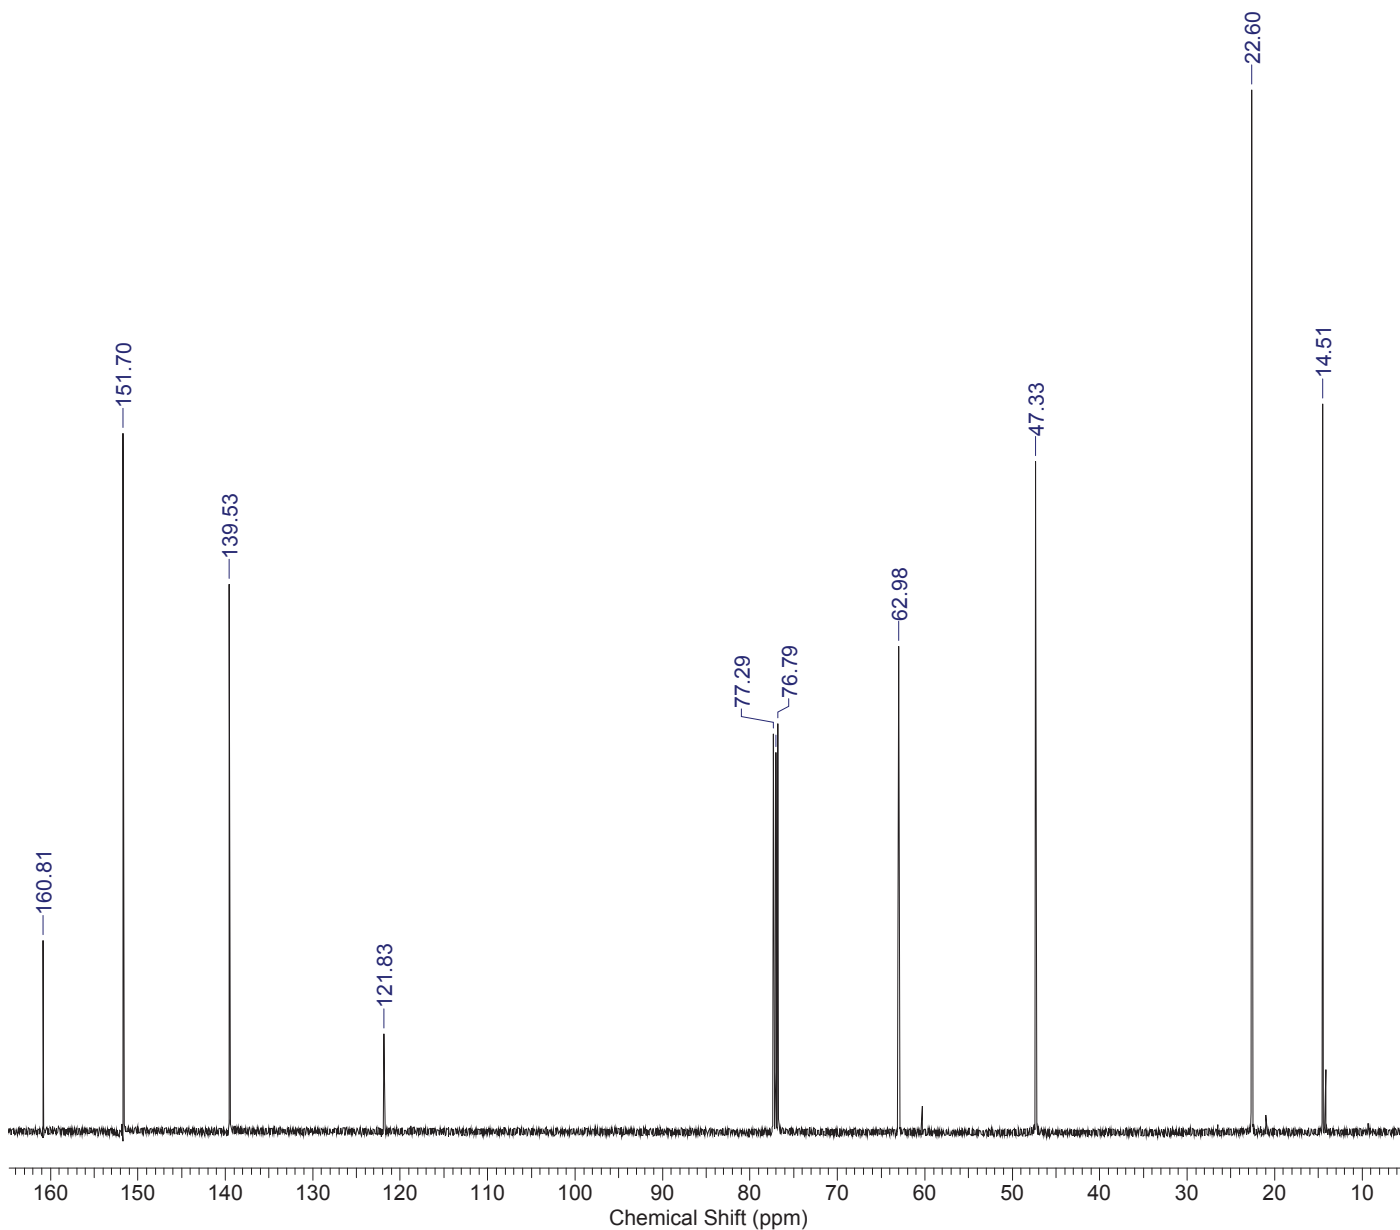

| No. | (ppm)  | (Hz)    | Height |
|-----|--------|---------|--------|
| 1   | 14.51  | 1823.8  | 0.6984 |
| 2   | 22.60  | 2840.4  | 1.0000 |
| 3   | 47.33  | 5948.6  | 0.6432 |
| 4   | 62.98  | 7915.1  | 0.4655 |
| 5   | 76.79  | 9650.8  | 0.3913 |
| 6   | 77.04  | 9683.3  | 0.3638 |
| 7   | 77.29  | 9714.7  | 0.3814 |
| 8   | 121.83 | 15312.0 | 0.0933 |
| 9   | 139.53 | 17537.0 | 0.5250 |
| 10  | 151.70 | 19066.8 | 0.6704 |
| 11  | 160.81 | 20211.2 | 0.1830 |

|                        |                                                                       |                  |             |                      |       |
|------------------------|-----------------------------------------------------------------------|------------------|-------------|----------------------|-------|
| Acquisition Time (sec) | 1.0486                                                                | Date             | Feb 20 2012 |                      |       |
| File Name              | C:\Users\usuario\Documents\Espectros Asier\RMN-145-12 ASIMJ-4\carbono |                  |             |                      |       |
| Frequency (MHz)        | 125.68                                                                | Nucleus          | 13C         | Number of Transients | 32000 |
| Original Points Count  | 32768                                                                 | Points Count     | 32768       | Pulse Sequence       | s2pul |
| Solvent                | CHLOROFORM-D                                                          | Sweep Width (Hz) | 31250.00    |                      |       |
| Temperature (degree C) | 25.000                                                                |                  |             |                      |       |

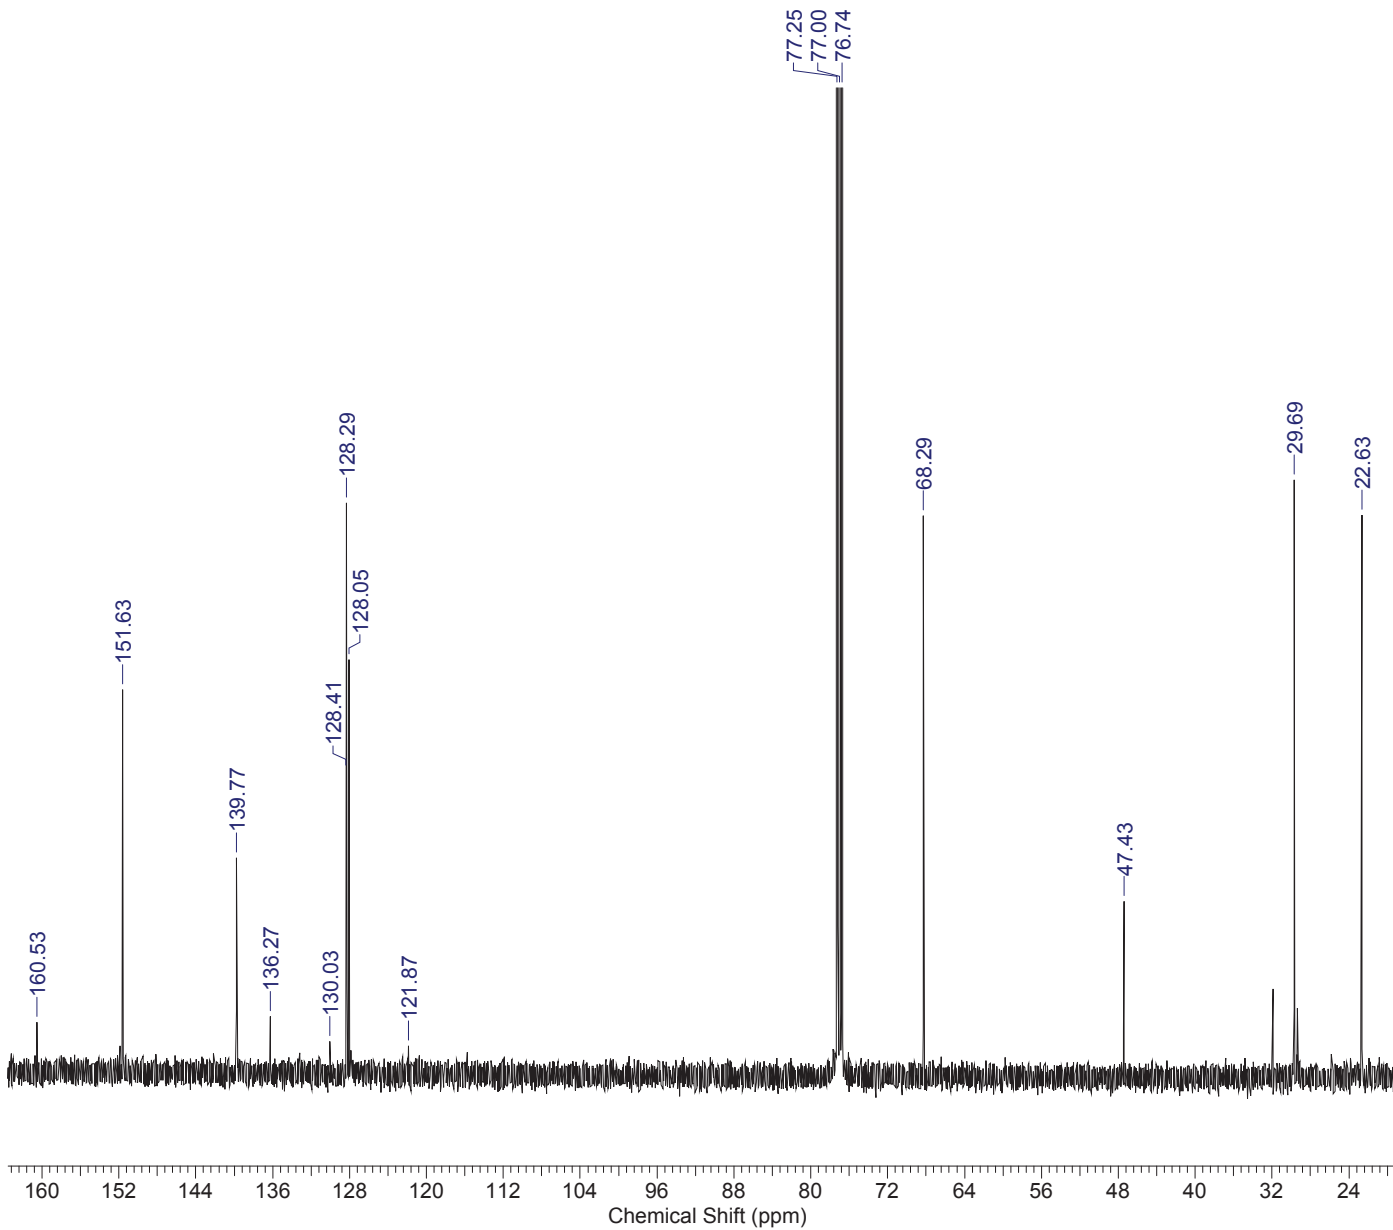

| No. | (ppm)  | (Hz)    | Height |
|-----|--------|---------|--------|
| 1   | 22.63  | 2844.3  | 0.2148 |
| 2   | 29.69  | 3731.2  | 0.2284 |
| 3   | 47.43  | 5961.0  | 0.0663 |
| 4   | 68.29  | 8582.7  | 0.2146 |
| 5   | 76.74  | 9645.1  | 1.0000 |
| 6   | 77.00  | 9677.5  | 0.9472 |
| 7   | 77.25  | 9709.0  | 0.9887 |
| 8   | 121.87 | 15316.8 | 0.0107 |
| 9   | 128.05 | 16094.1 | 0.1592 |
| 10  | 128.29 | 16124.6 | 0.2194 |
| 11  | 128.41 | 16138.9 | 0.1165 |
| 12  | 130.03 | 16343.0 | 0.0125 |
| 13  | 136.27 | 17126.9 | 0.0220 |
| 14  | 139.77 | 17567.5 | 0.0830 |
| 15  | 151.63 | 19057.2 | 0.1476 |
| 16  | 160.53 | 20175.9 | 0.0197 |

|                               |                                                                      |                         |             |                             |       |
|-------------------------------|----------------------------------------------------------------------|-------------------------|-------------|-----------------------------|-------|
| <b>Acquisition Time (sec)</b> | 1.9923                                                               | <b>Date</b>             | Feb 20 2012 |                             |       |
| <b>File Name</b>              | C:\Users\usuario\Documents\Espectros Asier\RMN-145-12 ASIMJ-4\proton |                         |             |                             |       |
| <b>Frequency (MHz)</b>        | 499.79                                                               | <b>Nucleus</b>          | 1H          | <b>Number of Transients</b> | 8     |
| <b>Original Points Count</b>  | 15964                                                                | <b>Points Count</b>     | 16384       | <b>Pulse Sequence</b>       | s2pul |
| <b>Solvent</b>                | CHLOROFORM-D                                                         | <b>Sweep Width (Hz)</b> | 8012.82     |                             |       |
| <b>Temperature (degree C)</b> | 25.000                                                               |                         |             |                             |       |

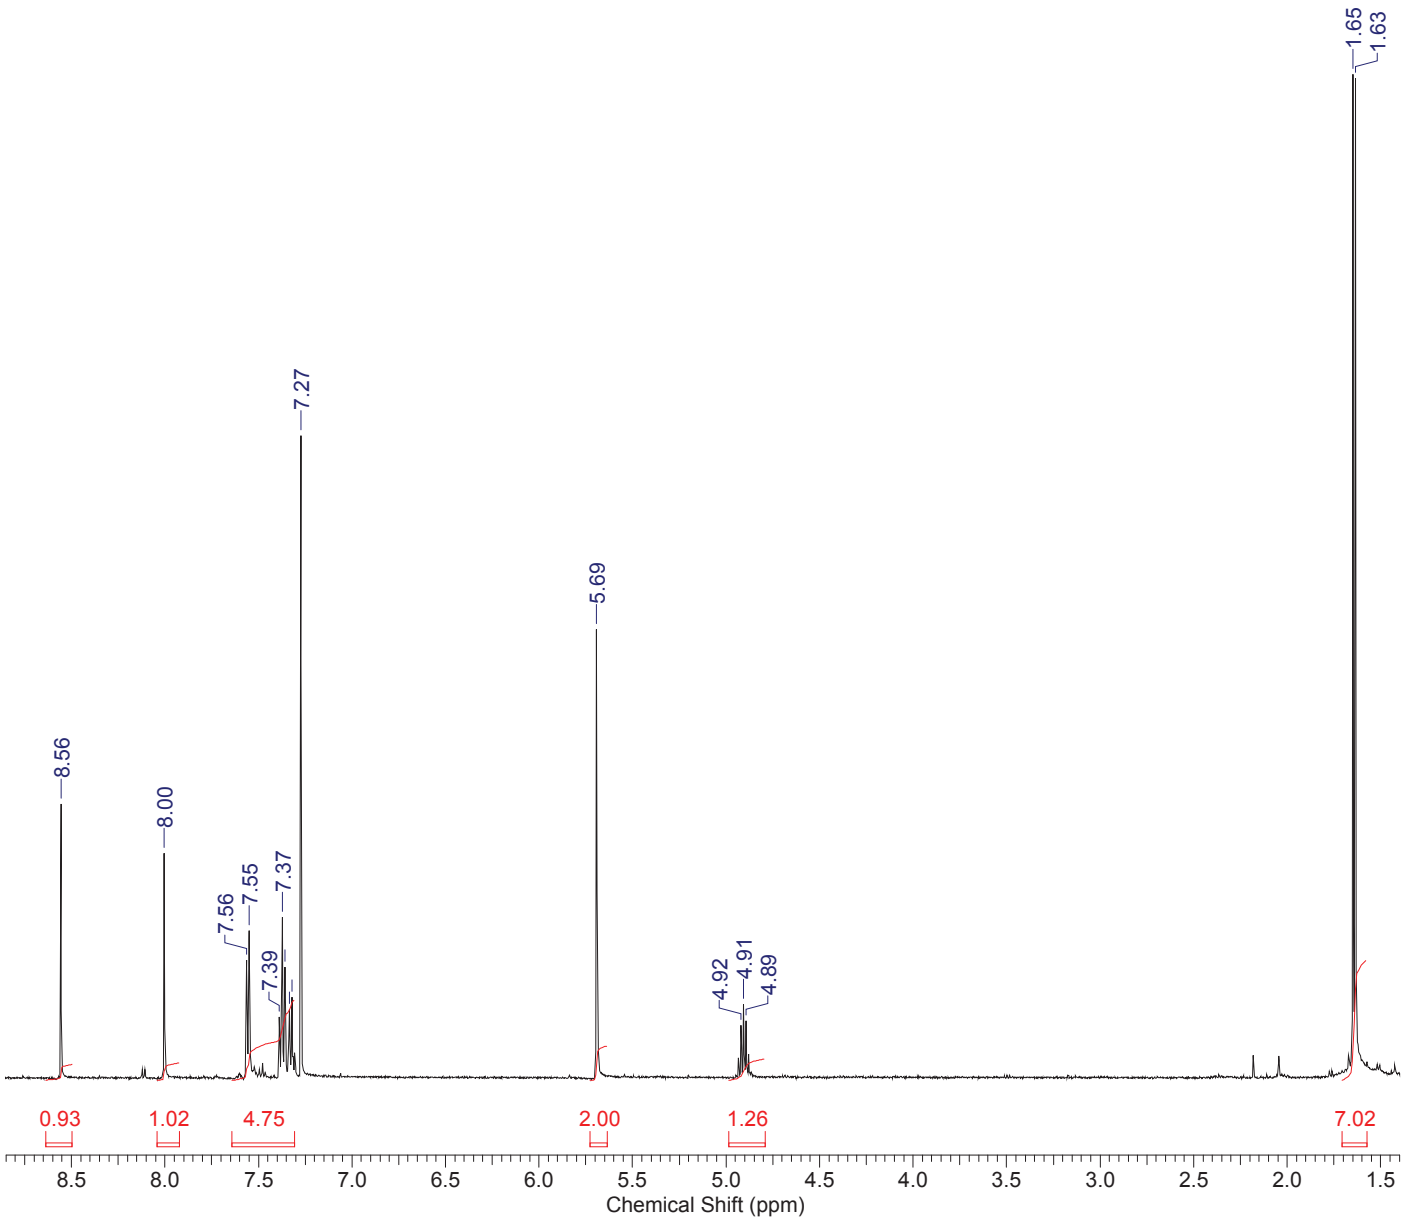

| No. | (ppm) | (Hz)   | Height |
|-----|-------|--------|--------|
| 1   | 1.63  | 816.9  | 0.9483 |
| 2   | 1.65  | 823.8  | 0.9517 |
| 3   | 4.89  | 2445.1 | 0.0564 |
| 4   | 4.91  | 2452.0 | 0.0723 |
| 5   | 4.92  | 2458.8 | 0.0524 |
| 6   | 5.69  | 2845.2 | 0.4268 |
| 7   | 7.27  | 3634.6 | 0.6098 |
| 8   | 7.32  | 3658.6 | 0.0785 |
| 9   | 7.33  | 3665.9 | 0.0672 |
| 10  | 7.36  | 3677.6 | 0.1072 |
| 11  | 7.37  | 3685.0 | 0.1544 |
| 12  | 7.39  | 3692.3 | 0.0603 |
| 13  | 7.55  | 3773.0 | 0.1416 |
| 14  | 7.56  | 3780.4 | 0.1137 |
| 15  | 8.00  | 4000.0 | 0.2149 |
| 16  | 8.56  | 4276.3 | 0.2617 |

| No. | (ppm)          | Value | Absolute Value |
|-----|----------------|-------|----------------|
| 1   | [1.57 .. 1.71] | 7.019 | 9.08332e+6     |
| 2   | [4.79 .. 4.98] | 1.259 | 1.62902e+6     |
| 3   | [5.64 .. 5.73] | 2.000 | 2.58826e+6     |
| 4   | [7.31 .. 7.64] | 4.745 | 6.14069e+6     |
| 5   | [7.92 .. 8.04] | 1.024 | 1.32578e+6     |
| 6   | [8.50 .. 8.64] | 0.932 | 1.20635e+6     |

Elemental Composition Report

Single Mass Analysis

Tolerance = 5.0 PPM / DBE: min = -1.5, max = 50.0

Element prediction: Off

Number of isotope peaks used for i-FIT = 3

Monoisotopic Mass, Even Electron Ions

498 formula(e) evaluated with 4 results within limits (up to 50 best isotopic matches for each mass)

Elements Used:

C: 0-22 H: 0-1000 N: 0-5 O: 0-6 F: 0-3

12/3292

ASIMJ-4.9 (0.217)

1: TOF MS ES+  
4.60e+001

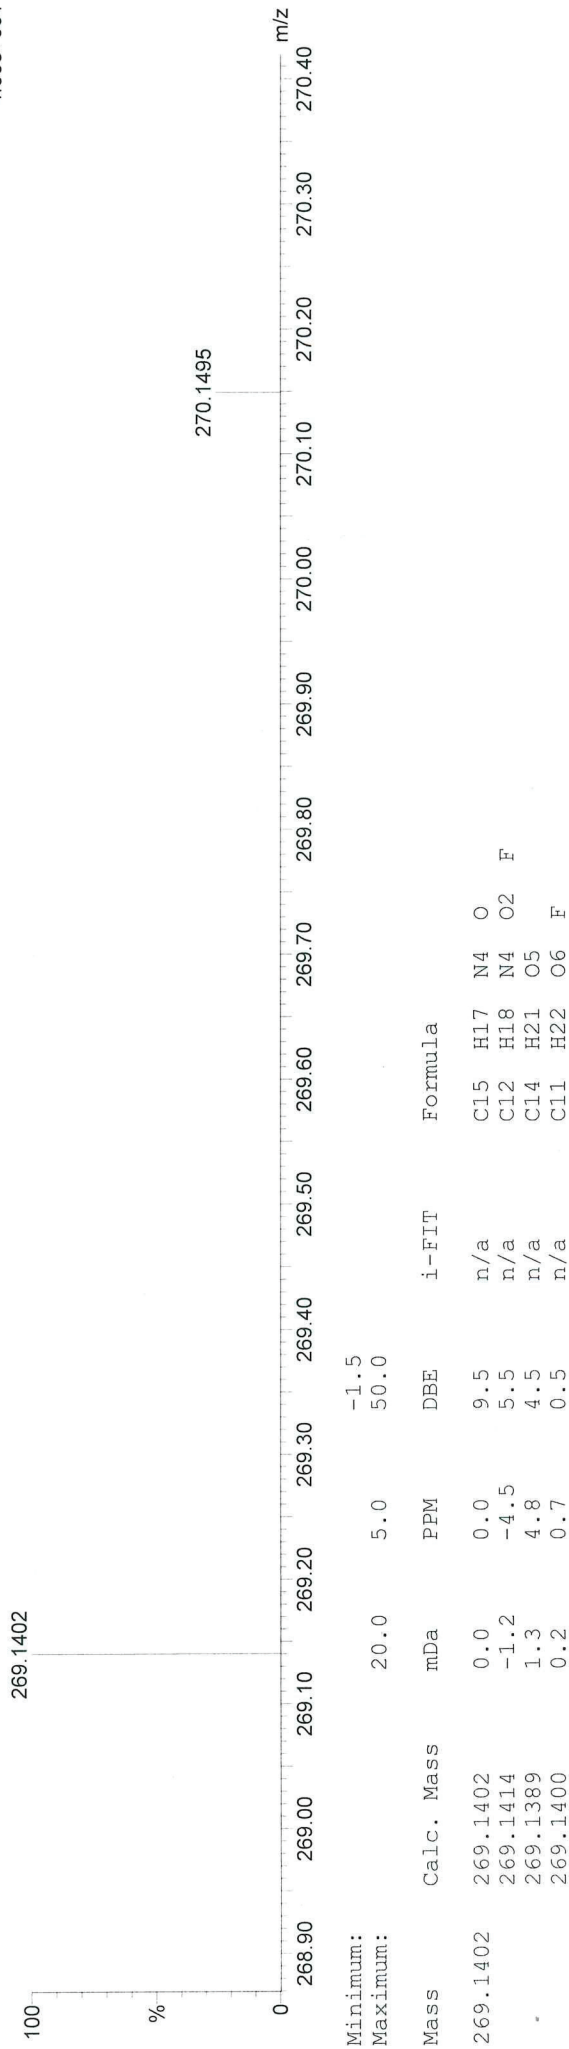

|                        |                                                                         |                  |          |                      |             |
|------------------------|-------------------------------------------------------------------------|------------------|----------|----------------------|-------------|
| Acquisition Time (sec) | 2.0487                                                                  | Comment          | ASIMJ-6p | Date                 | Apr 19 2012 |
| File Name              | C:\Users\usuario\Documents\Espectros Asier\12-5265_ASIMJ-6p\1H-ASIMJ-6p |                  |          |                      |             |
| Frequency (MHz)        | 300.20                                                                  | Nucleus          | 1H       | Number of Transients | 64          |
| Original Points Count  | 7380                                                                    | Points Count     | 8192     | Pulse Sequence       | s2pul       |
| Solvent                | CHLOROFORM-D                                                            | Sweep Width (Hz) | 3602.31  |                      |             |
| Temperature (degree C) | 30.000                                                                  |                  |          |                      |             |

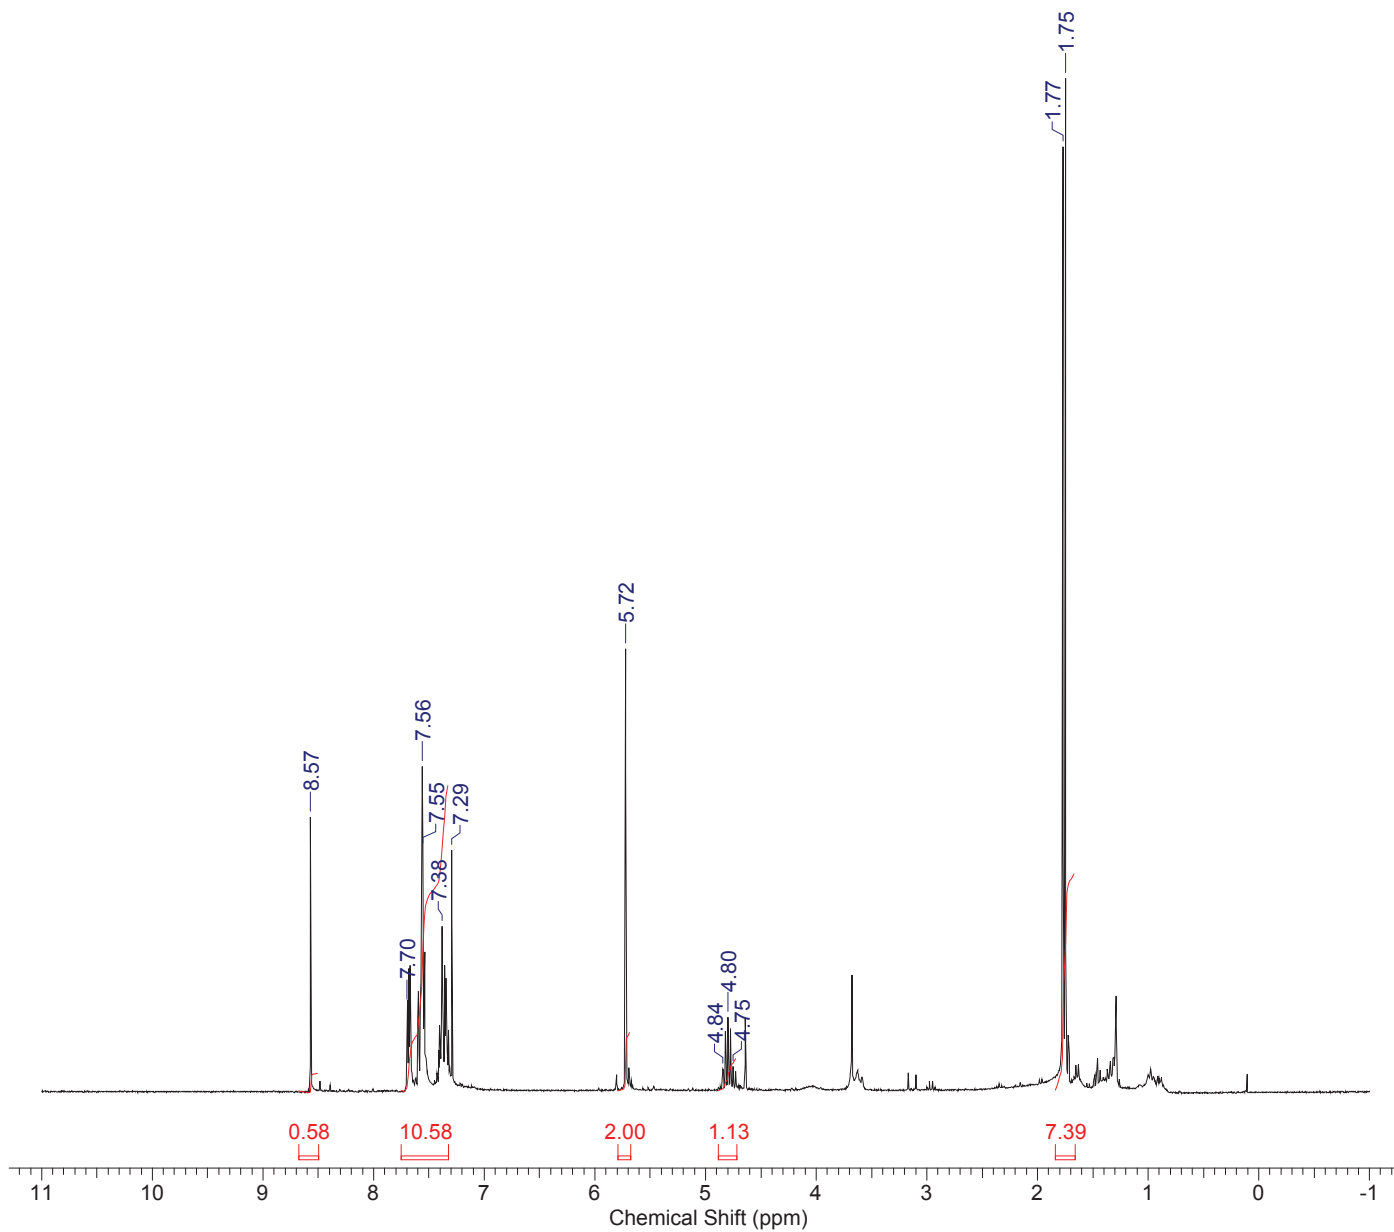

| No. | (ppm) | (Hz)   | Height |
|-----|-------|--------|--------|
| 1   | 1.75  | 524.4  | 1.0000 |
| 2   | 1.77  | 531.5  | 0.9324 |
| 3   | 4.75  | 1426.0 | 0.0237 |
| 4   | 4.80  | 1439.6 | 0.0729 |
| 5   | 4.84  | 1453.7 | 0.0214 |
| 6   | 5.72  | 1717.6 | 0.4364 |
| 7   | 7.29  | 2189.5 | 0.2378 |
| 8   | 7.38  | 2215.9 | 0.1621 |
| 9   | 7.55  | 2267.8 | 0.2390 |
| 10  | 7.56  | 2270.4 | 0.3199 |
| 11  | 7.70  | 2311.7 | 0.0844 |
| 12  | 8.57  | 2572.5 | 0.2705 |

| No. | (ppm)          | Value  | Absolute Value |
|-----|----------------|--------|----------------|
| 1   | [1.66 .. 1.84] | 7.393  | 2.72495e+8     |
| 2   | [4.72 .. 4.88] | 1.126  | 4.14961e+7     |
| 3   | [5.68 .. 5.79] | 2.000  | 7.37148e+7     |
| 4   | [7.32 .. 7.75] | 10.583 | 3.90054e+8     |
| 5   | [8.50 .. 8.68] | 0.582  | 2.14378e+7     |

### Elemental Composition Report

#### Single Mass Analysis

Tolerance = 5.0 PPM / DBE: min = -1.5, max = 50.0

Element prediction: Off

Number of isotope peaks used for i-FIT = 3

Monoisotopic Mass, Even Electron Ions

136 formula(e) evaluated with 1 results within limits (up to 50 best isotopic matches for each mass)

Elements Used:

C: 0-21 H: 0-1000 N: 0-4 O: 0-4 Na: 0-1

ASIMJ-6 4 (0.087)

12/5473

1: TOF MS ES+  
4.45e+002

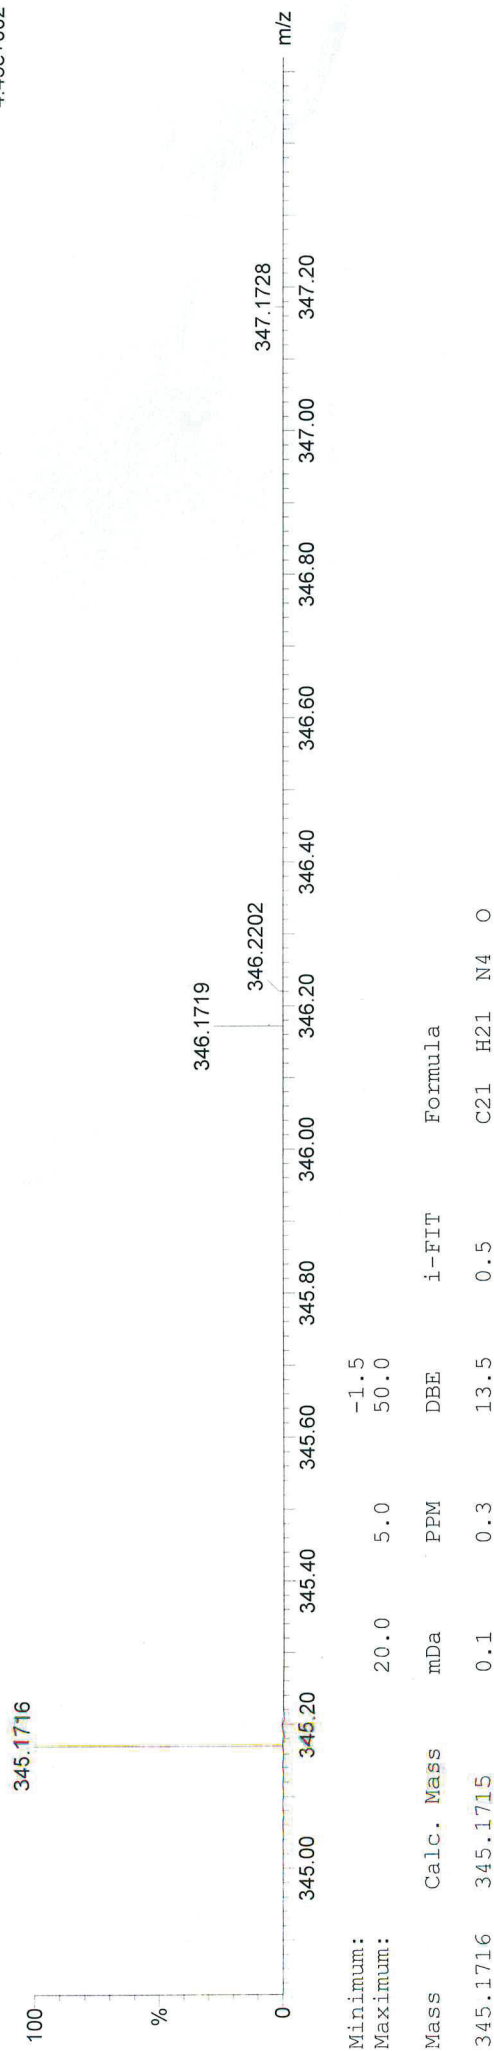

Minimum:  
Maximum:

-1.5  
50.0

| Mass     | Calc. Mass | mDa | PPM | DBE  | i-FIT | Formula      |
|----------|------------|-----|-----|------|-------|--------------|
| 345.1716 | 345.1715   | 0.1 | 0.3 | 13.5 | 0.5   | C21 H21 N4 O |



|                        |                                                                          |                  |          |                      |             |
|------------------------|--------------------------------------------------------------------------|------------------|----------|----------------------|-------------|
| Acquisition Time (sec) | 1.3005                                                                   | Comment          | ASIMJ-6p | Date                 | Apr 19 2012 |
| File Name              | C:\Users\usuario\Documents\Espectros Asier\12-5265_ASIMJ-6p\13C-ASIMJ-6p |                  |          |                      |             |
| Frequency (MHz)        | 75.49                                                                    | Nucleus          | 13C      | Number of Transients | 6400        |
| Original Points Count  | 23559                                                                    | Points Count     | 32768    | Pulse Sequence       | s2pul       |
| Solvent                | CHLOROFORM-D                                                             | Sweep Width (Hz) | 18115.94 |                      |             |
| Temperature (degree C) | 30.000                                                                   |                  |          |                      |             |

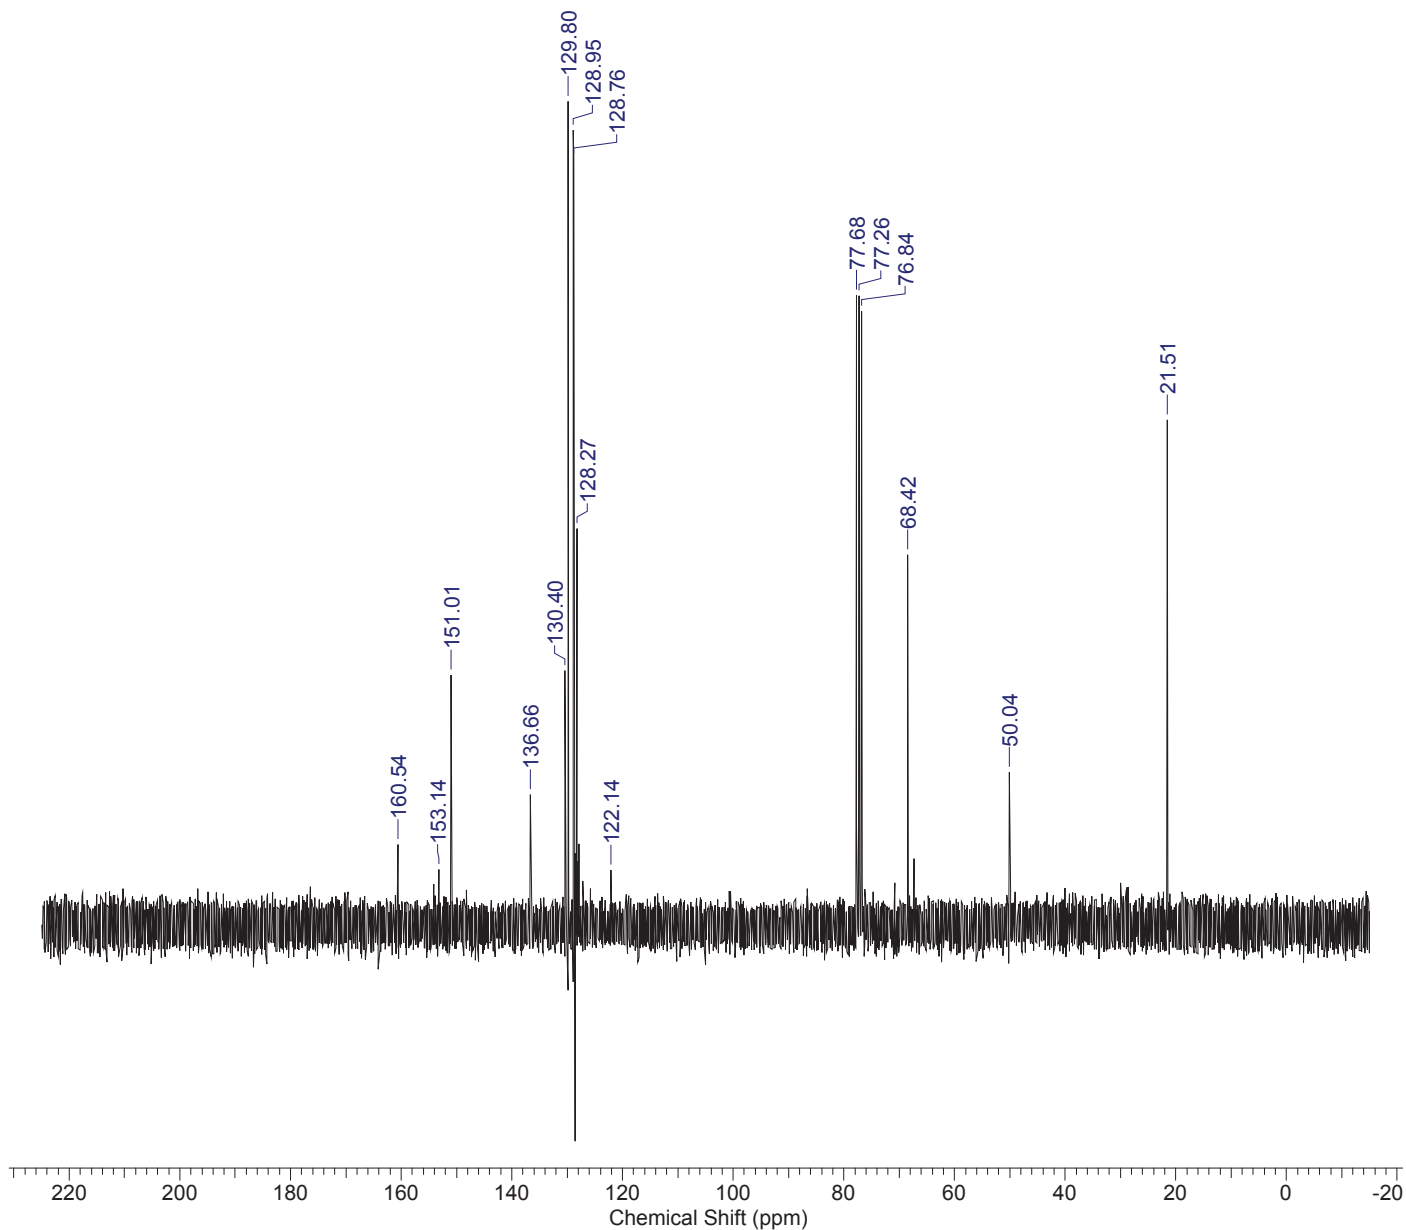

| No. | (ppm)  | (Hz)    | Height |
|-----|--------|---------|--------|
| 1   | 21.51  | 1624.0  | 0.6139 |
| 2   | 50.04  | 3777.4  | 0.1866 |
| 3   | 68.42  | 5165.1  | 0.4500 |
| 4   | 76.84  | 5800.9  | 0.7455 |
| 5   | 77.26  | 5832.4  | 0.7640 |
| 6   | 77.68  | 5864.5  | 0.7647 |
| 7   | 122.14 | 9220.4  | 0.0674 |
| 8   | 128.27 | 9683.8  | 0.4819 |
| 9   | 128.61 | 9709.2  | 0.8357 |
| 10  | 128.76 | 9720.2  | 0.9293 |
| 11  | 128.95 | 9734.6  | 0.9649 |
| 12  | 129.80 | 9799.3  | 1.0000 |
| 13  | 130.40 | 9844.1  | 0.3097 |
| 14  | 136.66 | 10316.8 | 0.1588 |
| 15  | 151.01 | 11399.9 | 0.3044 |
| 16  | 153.14 | 11560.8 | 0.0682 |
| 17  | 160.54 | 12119.7 | 0.0983 |

|                               |                                                                           |                     |                 |                             |             |
|-------------------------------|---------------------------------------------------------------------------|---------------------|-----------------|-----------------------------|-------------|
| <b>Acquisition Time (sec)</b> | 1.0000                                                                    | <b>Comment</b>      | ASIMJ-6p        | <b>Date</b>                 | Apr 19 2012 |
| <b>File Name</b>              | C:\Users\usuario\Documents\Espectros Asier\12-5265_ASIMJ-6p\DEPT-ASIMJ-6p |                     |                 |                             |             |
| <b>Frequency (MHz)</b>        | 75.49                                                                     | <b>Nucleus</b>      | <sup>13</sup> C | <b>Number of Transients</b> | 4800        |
| <b>Original Points Count</b>  | 18116                                                                     | <b>Points Count</b> | 32768           | <b>Pulse Sequence</b>       | DEPT135     |
| <b>Solvent</b>                | CHLOROFORM-D                                                              |                     |                 | <b>Sweep Width (Hz)</b>     | 18115.94    |
| <b>Temperature (degree C)</b> | 30.000                                                                    |                     |                 |                             |             |

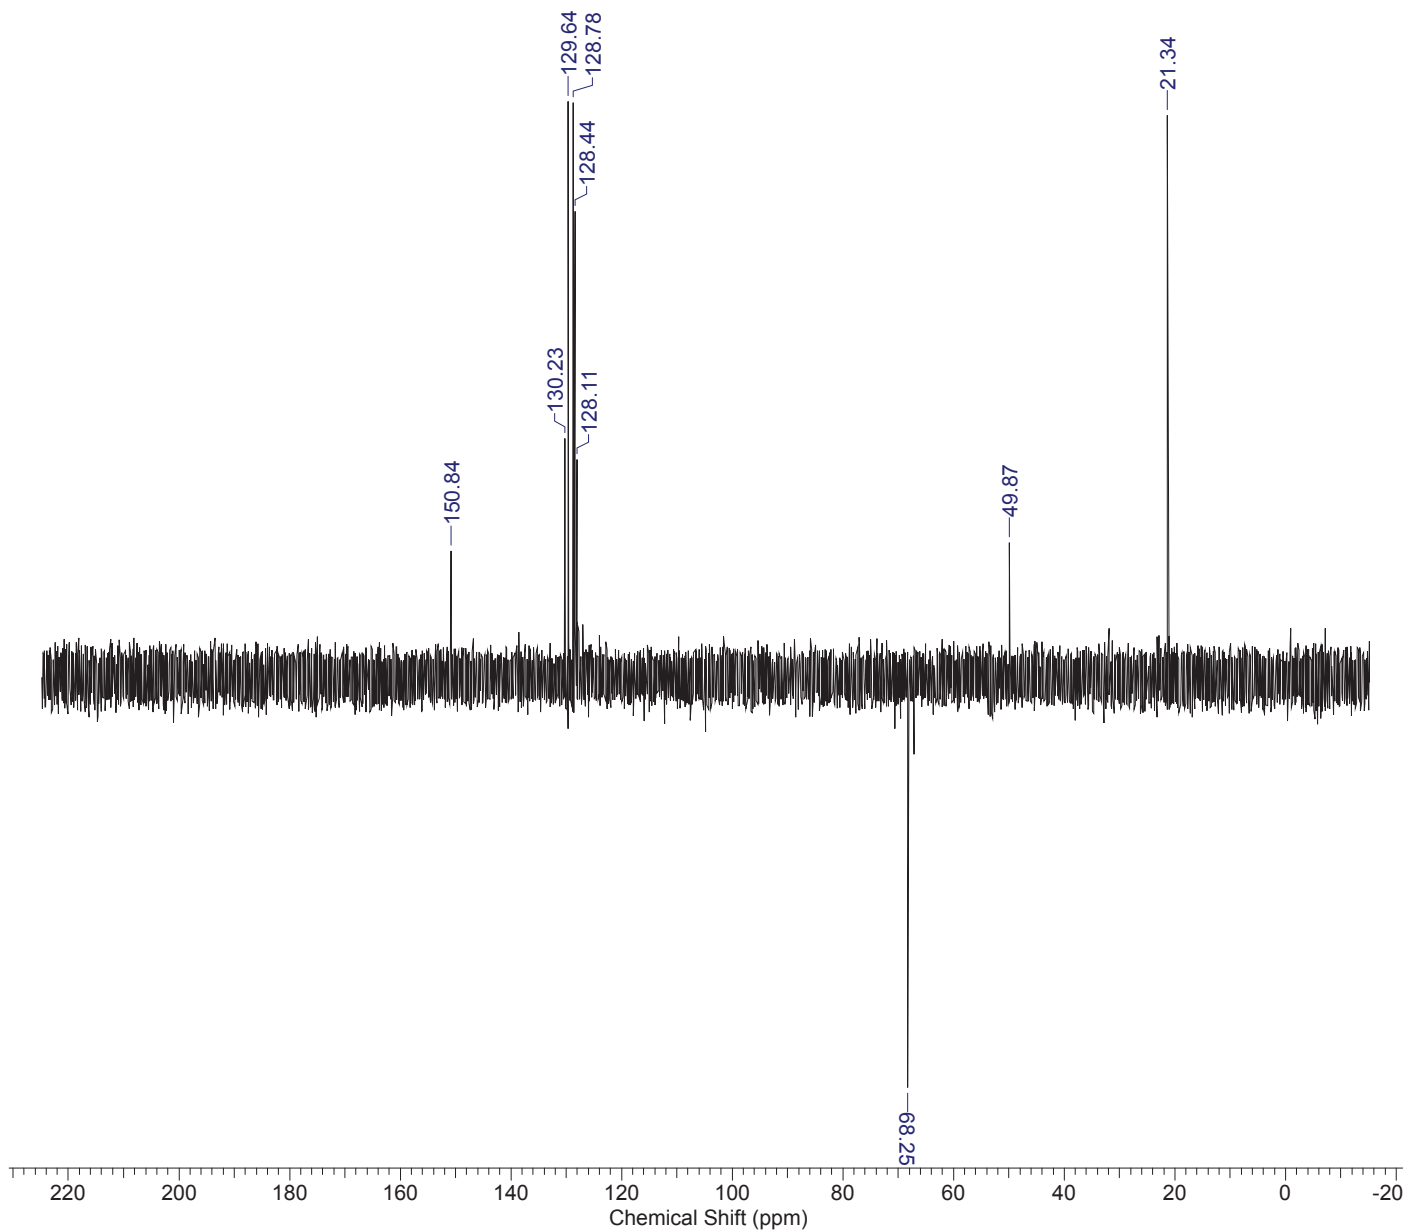

| No. | (ppm)  | (Hz)    | Height  |
|-----|--------|---------|---------|
| 1   | 21.34  | 1611.3  | 0.9748  |
| 2   | 49.87  | 3764.7  | 0.2347  |
| 3   | 68.25  | 5152.5  | -0.7110 |
| 4   | 128.11 | 9671.1  | 0.3783  |
| 5   | 128.44 | 9696.5  | 0.8089  |
| 6   | 128.59 | 9707.6  | 0.8026  |
| 7   | 128.78 | 9721.9  | 0.9972  |
| 8   | 129.64 | 9786.6  | 1.0000  |
| 9   | 130.23 | 9831.4  | 0.4147  |
| 10  | 150.84 | 11387.2 | 0.2201  |

## Elemental Composition Report

Page 1

## Single Mass Analysis

Tolerance = 5.0 PPM / DBE: min = -1.5, max = 50.0

Element prediction: Off

Number of isotope peaks used for i-FIT = 3

Monoisotopic Mass, Even Electron Ions

635 formula(e) evaluated with 1 results within limits (up to 50 closest results for each mass)

Elements Used:

C: 0-22 H: 0-1000 N: 0-5 O: 0-20 Na: 0-1

12/21702

ASIMJ-27P3 14 (0.317)

1: TOF MS ES+  
8.90e+002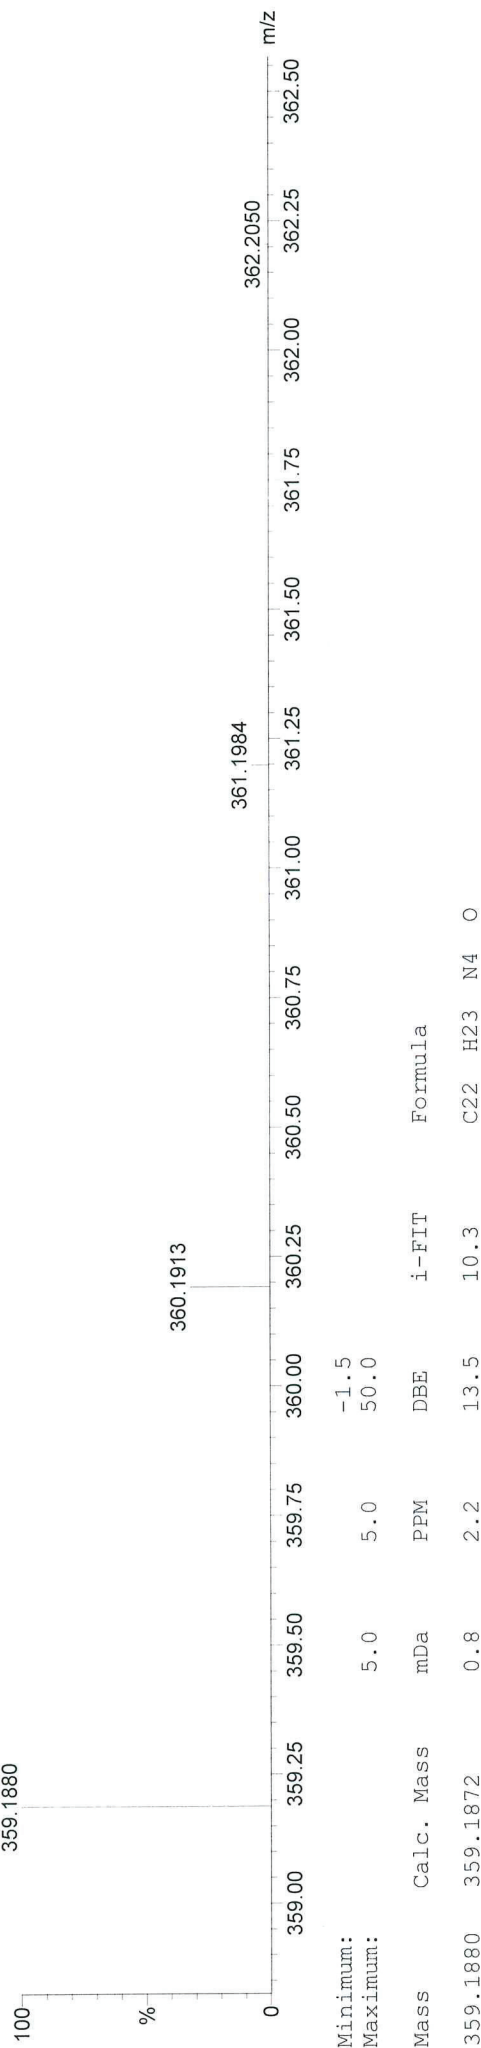

Minimum:

Maximum:

-1.5

50.0

Mass

Calc. Mass

mDa

PPM

DBE

i-FIT

Formula

359.1880

359.1872

0.8

2.2

13.5

10.3

C22 H23 N4 O

|                               |                                                                                     |                     |               |                             |             |
|-------------------------------|-------------------------------------------------------------------------------------|---------------------|---------------|-----------------------------|-------------|
| <b>Acquisition Time (sec)</b> | 1.3005                                                                              | <b>Comment</b>      | ASIMJ-27-P2-P | <b>Date</b>                 | Oct 22 2012 |
| <b>File Name</b>              | C:\Users\usuario\Documents\Espectros Asier\12-21939 ASIMJ-27-P2-P\13C-ASIMJ-27-P2-P |                     |               |                             |             |
| <b>Frequency (MHz)</b>        | 75.49                                                                               | <b>Nucleus</b>      | 13C           | <b>Number of Transients</b> | 10000       |
| <b>Original Points Count</b>  | 23559                                                                               | <b>Points Count</b> | 32768         | <b>Pulse Sequence</b>       | s2pul       |
| <b>Solvent</b>                | CHLOROFORM-D                                                                        |                     |               | <b>Sweep Width (Hz)</b>     | 18115.94    |
| <b>Temperature (degree C)</b> | 30.000                                                                              |                     |               |                             |             |

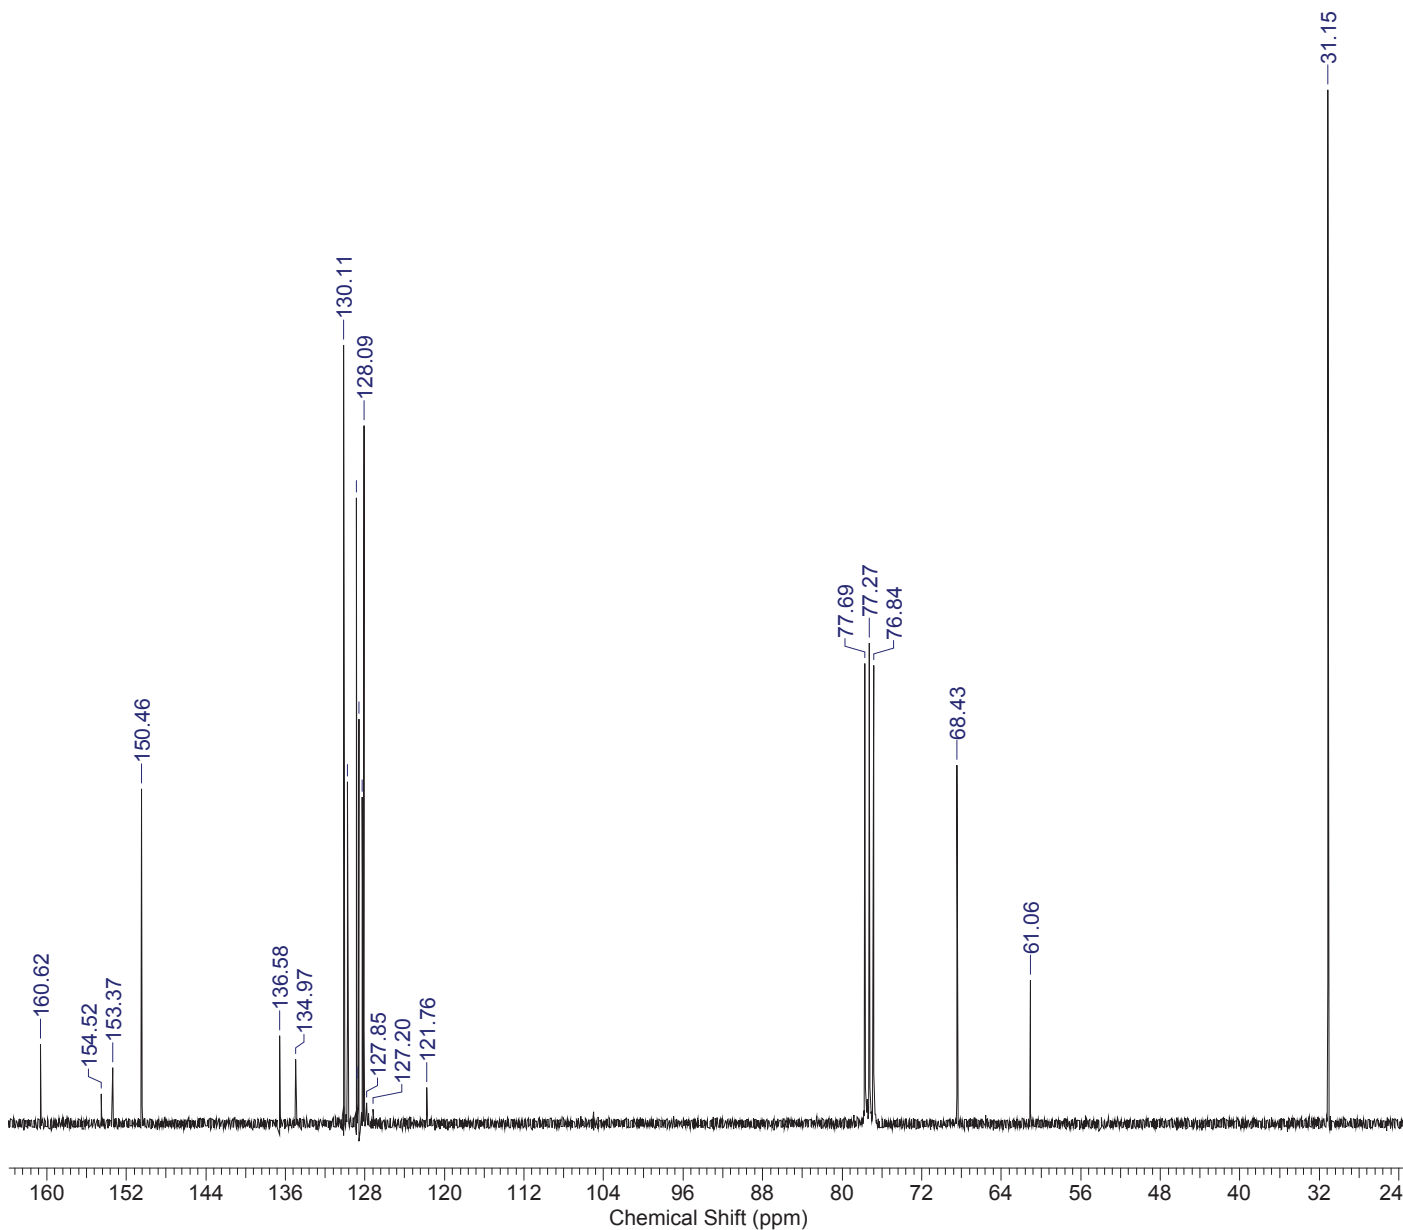

| No. | (ppm)  | (Hz)   | Height | No. | (ppm)  | (Hz)    | Height |
|-----|--------|--------|--------|-----|--------|---------|--------|
| 1   | 31.15  | 2351.6 | 1.0000 | 13  | 128.59 | 9707.5  | 0.3914 |
| 2   | 61.06  | 4609.5 | 0.1388 | 14  | 128.67 | 9713.6  | 0.0190 |
| 3   | 68.43  | 5166.3 | 0.3470 | 15  | 128.78 | 9721.9  | 0.0381 |
| 4   | 76.84  | 5800.9 | 0.4431 | 16  | 128.85 | 9727.4  | 0.6056 |
| 5   | 77.27  | 5833.0 | 0.4649 | 17  | 129.72 | 9793.2  | 0.3308 |
| 6   | 77.69  | 5865.1 | 0.4451 | 18  | 130.11 | 9822.5  | 0.7535 |
| 7   | 121.76 | 9192.3 | 0.0353 | 19  | 134.97 | 10189.6 | 0.0624 |
| 8   | 127.20 | 9602.5 | 0.0139 | 20  | 136.58 | 10310.7 | 0.0852 |
| 9   | 127.85 | 9651.7 | 0.0204 | 21  | 150.46 | 11358.4 | 0.3239 |
| 10  | 128.09 | 9669.9 | 0.6750 | 22  | 153.37 | 11578.5 | 0.0544 |
| 11  | 128.27 | 9683.8 | 0.3159 | 23  | 154.52 | 11665.3 | 0.0286 |
| 12  | 128.52 | 9702.6 | 0.0149 | 24  | 160.62 | 12125.8 | 0.0769 |

|                        |                                                                                    |                  |               |                      |             |
|------------------------|------------------------------------------------------------------------------------|------------------|---------------|----------------------|-------------|
| Acquisition Time (sec) | 2.0487                                                                             | Comment          | ASIMJ-27-P2-P | Date                 | Oct 19 2012 |
| File Name              | C:\Users\usuario\Documents\Espectros Asier\12-21939 ASIMJ-27-P2-P\1H-ASIMJ-27-P2-P |                  |               |                      |             |
| Frequency (MHz)        | 300.20                                                                             | Nucleus          | 1H            | Number of Transients | 64          |
| Original Points Count  | 7380                                                                               | Points Count     | 8192          | Pulse Sequence       | s2pul       |
| Solvent                | CHLOROFORM-D                                                                       | Sweep Width (Hz) | 3602.31       |                      |             |
| Temperature (degree C) | 30.000                                                                             |                  |               |                      |             |

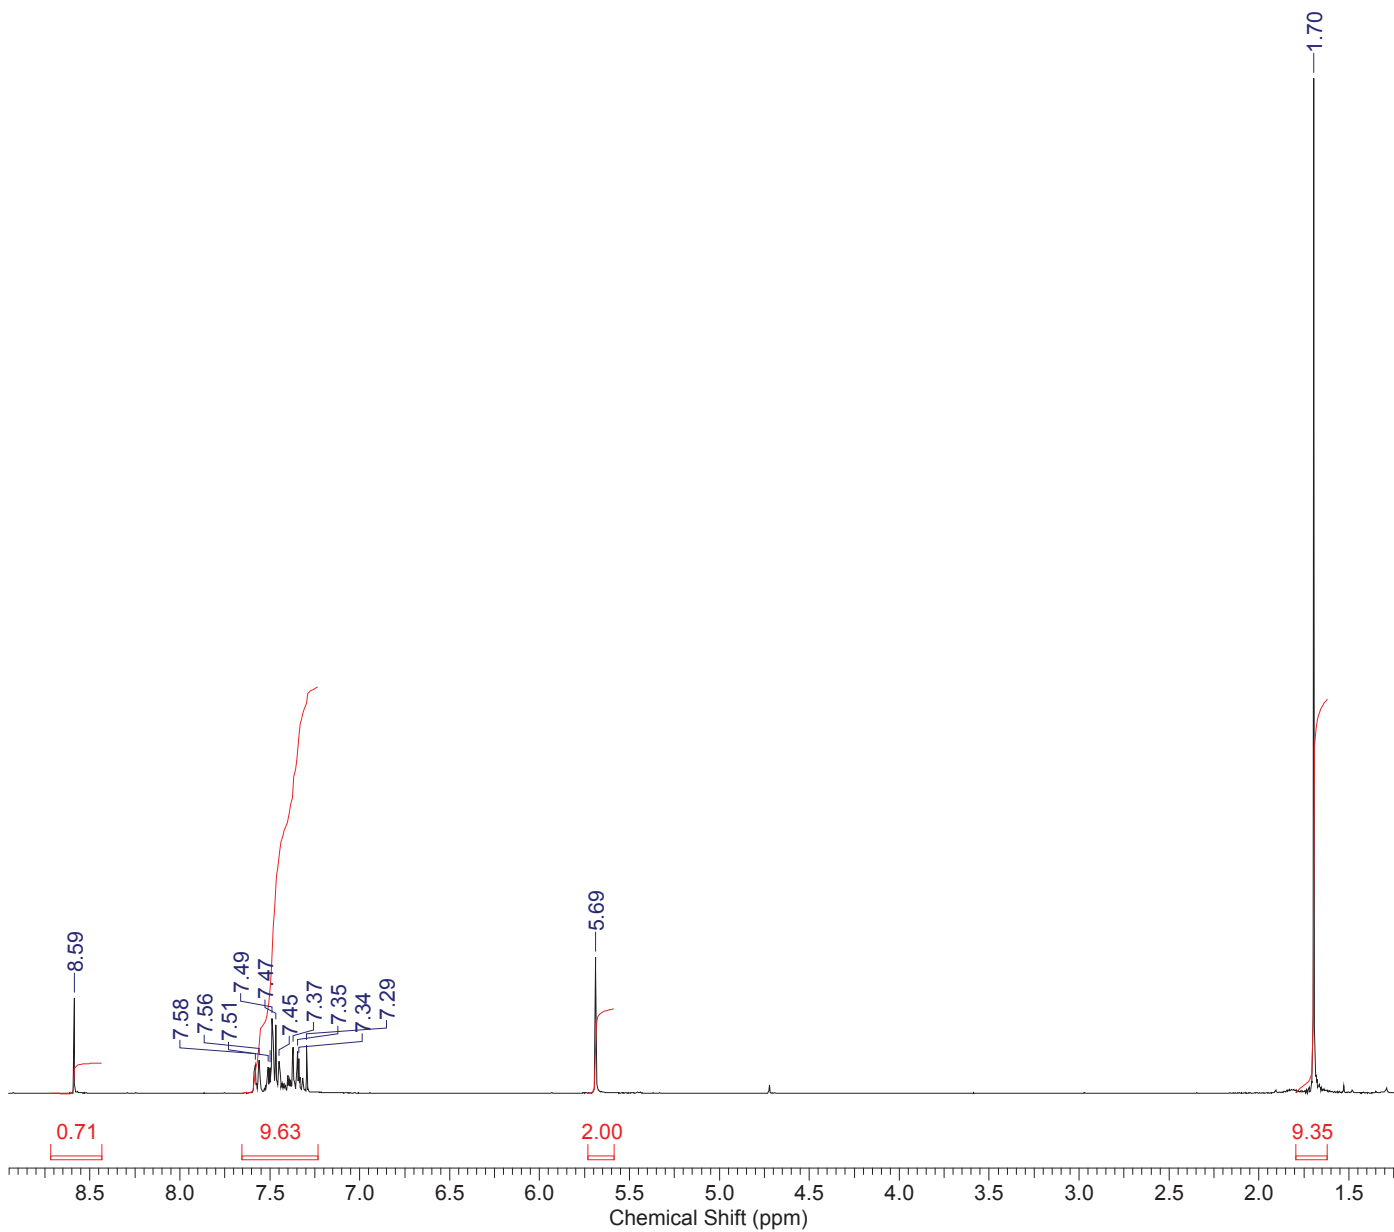

| No. | (ppm) | (Hz)   | Height |
|-----|-------|--------|--------|
| 1   | 1.70  | 509.0  | 1.0000 |
| 2   | 5.69  | 1707.9 | 0.1344 |
| 3   | 7.29  | 2189.9 | 0.0470 |
| 4   | 7.34  | 2203.1 | 0.0338 |
| 5   | 7.35  | 2205.3 | 0.0415 |
| 6   | 7.37  | 2212.8 | 0.0455 |
| 7   | 7.45  | 2236.1 | 0.0317 |
| 8   | 7.47  | 2241.4 | 0.0675 |
| 9   | 7.49  | 2247.5 | 0.0736 |
| 10  | 7.50  | 2251.0 | 0.0253 |
| 11  | 7.51  | 2254.6 | 0.0254 |
| 12  | 7.56  | 2269.5 | 0.0329 |
| 13  | 7.58  | 2276.1 | 0.0273 |
| 14  | 8.59  | 2578.2 | 0.0940 |

| No. | (ppm)          | Value | Absolute Value |
|-----|----------------|-------|----------------|
| 1   | [1.62 .. 1.80] | 9.348 | 7.90278e+8     |
| 2   | [5.58 .. 5.73] | 2.000 | 1.69088e+8     |
| 3   | [7.23 .. 7.66] | 9.629 | 8.14099e+8     |
| 4   | [8.43 .. 8.72] | 0.706 | 5.96692e+7     |

2 Jul 2013

|                        |                                                            |              |                    |                      |            |
|------------------------|------------------------------------------------------------|--------------|--------------------|----------------------|------------|
| Acquisition Time (sec) | 1.0486                                                     | Comment      | new experiment     | Date                 | Jun 3 2013 |
| File Name              | C:\Users\usuario\Documents\Espectros 2ª Gen-Asier\13-13401 |              | 2G-ASIMJ-4\carbono |                      |            |
| Frequency (MHz)        | 125.68                                                     | Nucleus      | 13C                | Number of Transients | 1200       |
| Original Points Count  | 32768                                                      | Points Count | 32768              | Pulse Sequence       | s2pul      |
| Solvent                | CHLOROFORM-D                                               |              | Sweep Width (Hz)   |                      |            |
| Temperature (degree C) | 25.000                                                     |              |                    |                      |            |

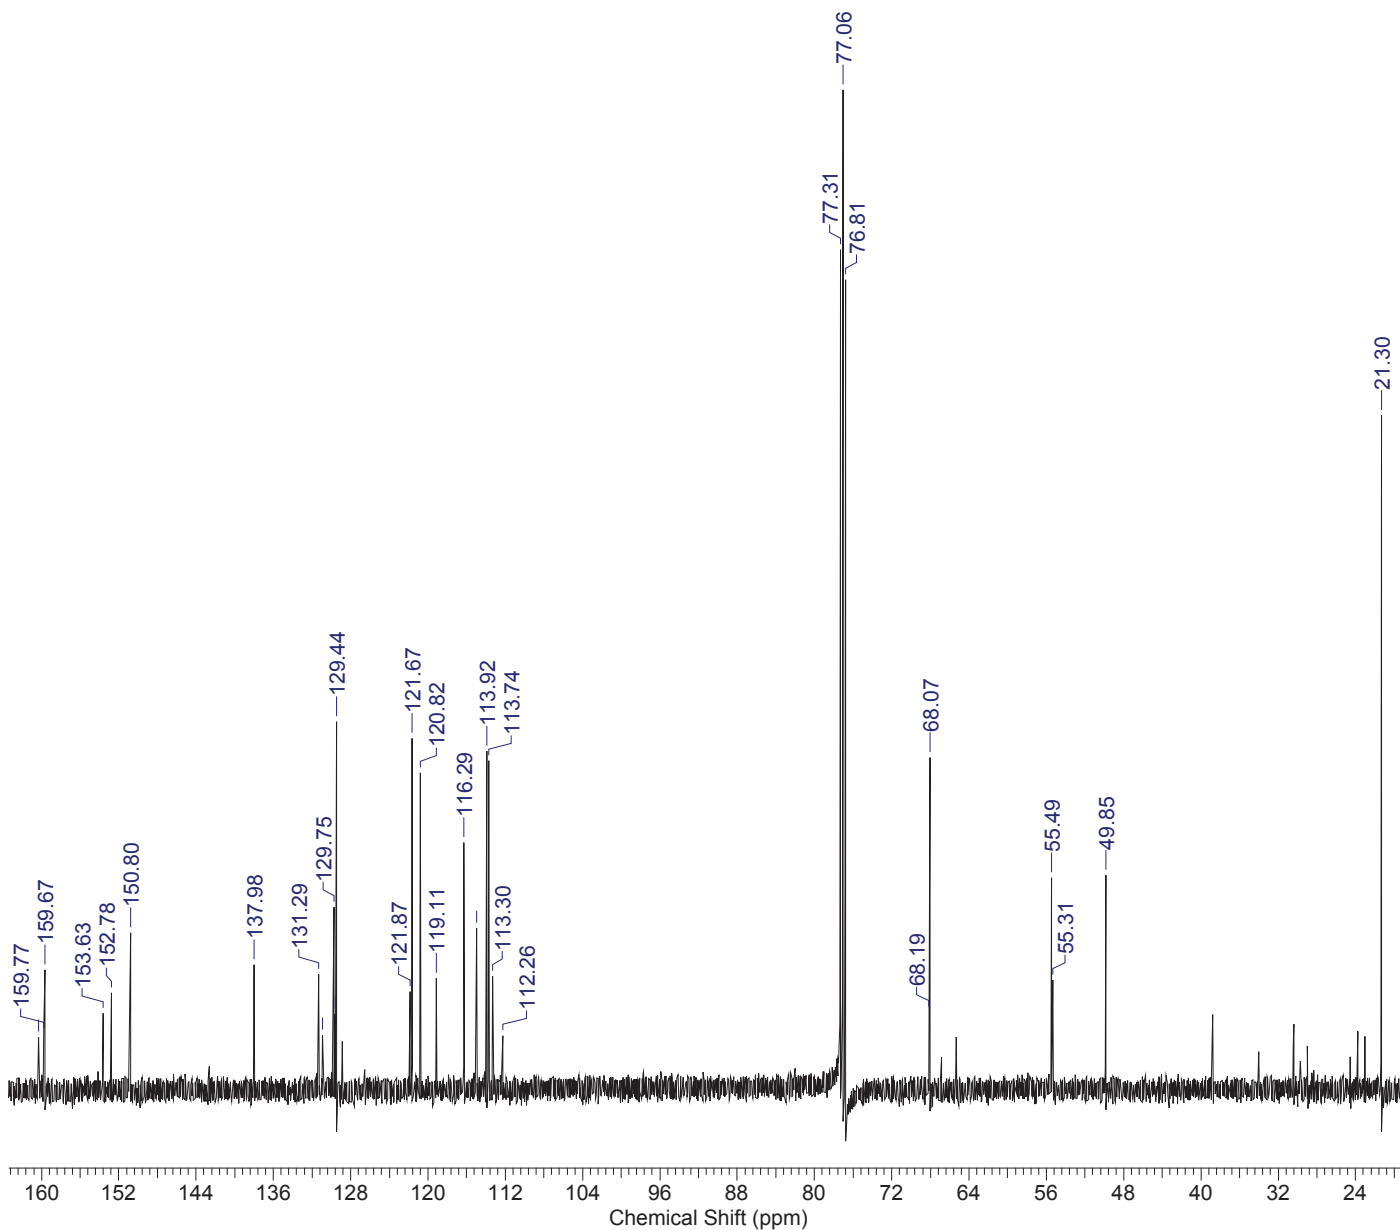

| No. | (ppm)  | (Hz)    | Height | No. | (ppm)  | (Hz)    | Height |
|-----|--------|---------|--------|-----|--------|---------|--------|
| 1   | 21.30  | 2676.9  | 0.6743 | 17  | 119.11 | 14970.1 | 0.1106 |
| 2   | 49.85  | 6265.7  | 0.2134 | 18  | 120.82 | 15184.7 | 0.3164 |
| 3   | 55.26  | 6945.7  | 0.0986 | 19  | 121.67 | 15291.5 | 0.3509 |
| 4   | 55.31  | 6951.4  | 0.1089 | 20  | 121.87 | 15317.3 | 0.0970 |
| 5   | 55.49  | 6974.3  | 0.2111 | 21  | 129.44 | 16269.1 | 0.3675 |
| 6   | 68.07  | 8555.5  | 0.3317 | 22  | 129.63 | 16292.0 | 0.0748 |
| 7   | 68.19  | 8570.8  | 0.0769 | 23  | 129.75 | 16308.2 | 0.1815 |
| 8   | 76.81  | 9653.3  | 0.8097 | 24  | 130.91 | 16453.2 | 0.0534 |
| 9   | 77.06  | 9684.7  | 1.0000 | 25  | 131.29 | 16500.8 | 0.1145 |
| 10  | 77.31  | 9717.1  | 0.8400 | 26  | 137.98 | 17342.0 | 0.1240 |
| 11  | 112.26 | 14109.9 | 0.0529 | 27  | 150.80 | 18953.8 | 0.1563 |
| 12  | 113.30 | 14240.6 | 0.1126 | 28  | 152.78 | 19202.7 | 0.0955 |
| 13  | 113.74 | 14294.9 | 0.3282 | 29  | 153.63 | 19308.5 | 0.0752 |
| 14  | 113.92 | 14317.8 | 0.3379 | 30  | 159.67 | 20068.6 | 0.1188 |
| 15  | 114.96 | 14448.5 | 0.1602 | 31  | 159.77 | 20081.0 | 0.0549 |
| 16  | 116.29 | 14616.3 | 0.2461 | 32  | 160.27 | 20144.0 | 0.0514 |

|                               |                                                            |                     |                         |                             |            |
|-------------------------------|------------------------------------------------------------|---------------------|-------------------------|-----------------------------|------------|
| <b>Acquisition Time (sec)</b> | 1.0486                                                     | <b>Comment</b>      | new experiment          | <b>Date</b>                 | Jun 3 2013 |
| <b>File Name</b>              | C:\Users\usuario\Documents\Espectros 2ª Gen-Asier\13-13401 |                     | 2G-ASIMJ-4\dept         |                             |            |
| <b>Frequency (MHz)</b>        | 125.68                                                     | <b>Nucleus</b>      | 13C                     | <b>Number of Transients</b> | 1200       |
| <b>Original Points Count</b>  | 32768                                                      | <b>Points Count</b> | 32768                   | <b>Pulse Sequence</b>       | DEPT135    |
| <b>Solvent</b>                | CHLOROFORM-D                                               |                     | <b>Sweep Width (Hz)</b> | 31250.00                    |            |
| <b>Temperature (degree C)</b> | 25.000                                                     |                     |                         |                             |            |

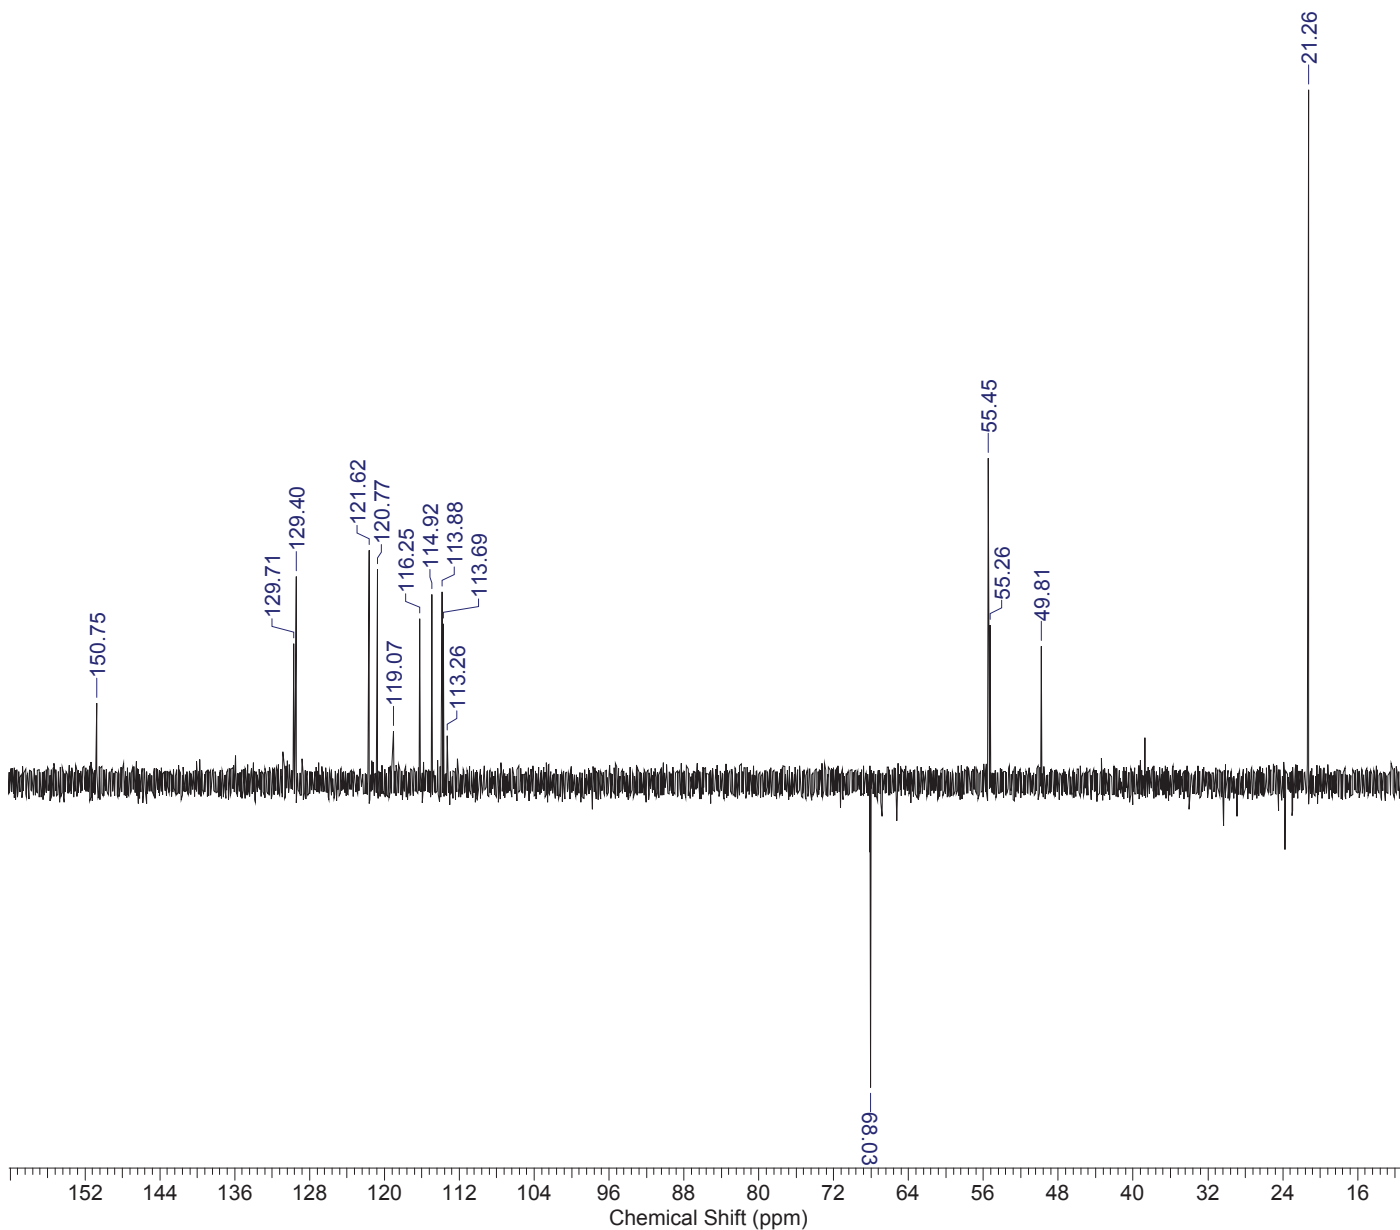

| No. | (ppm)  | (Hz)    | Height  |
|-----|--------|---------|---------|
| 1   | 21.26  | 2671.6  | 1.0000  |
| 2   | 49.81  | 6260.4  | 0.1963  |
| 3   | 55.22  | 6940.4  | 0.1545  |
| 4   | 55.26  | 6945.2  | 0.2267  |
| 5   | 55.45  | 6969.0  | 0.4680  |
| 6   | 68.03  | 8550.3  | -0.4404 |
| 7   | 113.26 | 14235.3 | 0.0677  |
| 8   | 113.69 | 14289.7 | 0.2291  |
| 9   | 113.88 | 14312.5 | 0.2754  |
| 10  | 114.92 | 14443.2 | 0.2714  |
| 11  | 116.25 | 14611.1 | 0.2360  |
| 12  | 119.07 | 14964.9 | 0.0744  |
| 13  | 120.77 | 15179.5 | 0.3076  |
| 14  | 121.62 | 15286.3 | 0.3350  |
| 15  | 129.40 | 16263.8 | 0.2975  |
| 16  | 129.71 | 16302.9 | 0.1999  |
| 17  | 150.75 | 18947.5 | 0.1144  |





Elemental Composition Report

Single Mass Analysis

Tolerance = 10.0 PPM / DBE: min = -1.5, max = 50.0  
 Element prediction: Off  
 Number of isotope peaks used for i-FIT = 3

Monoisotopic Mass, Even Electron Ions  
 359 formula(e) evaluated with 2 results within limits (up to 50 best isotopic matches for each mass)  
 Elements Used:

C: 0-23 H: 0-1000 N: 0-4 O: 0-4 Na: 0-1 I: 0-2

1: TOF MS ES+  
 9.24e+002

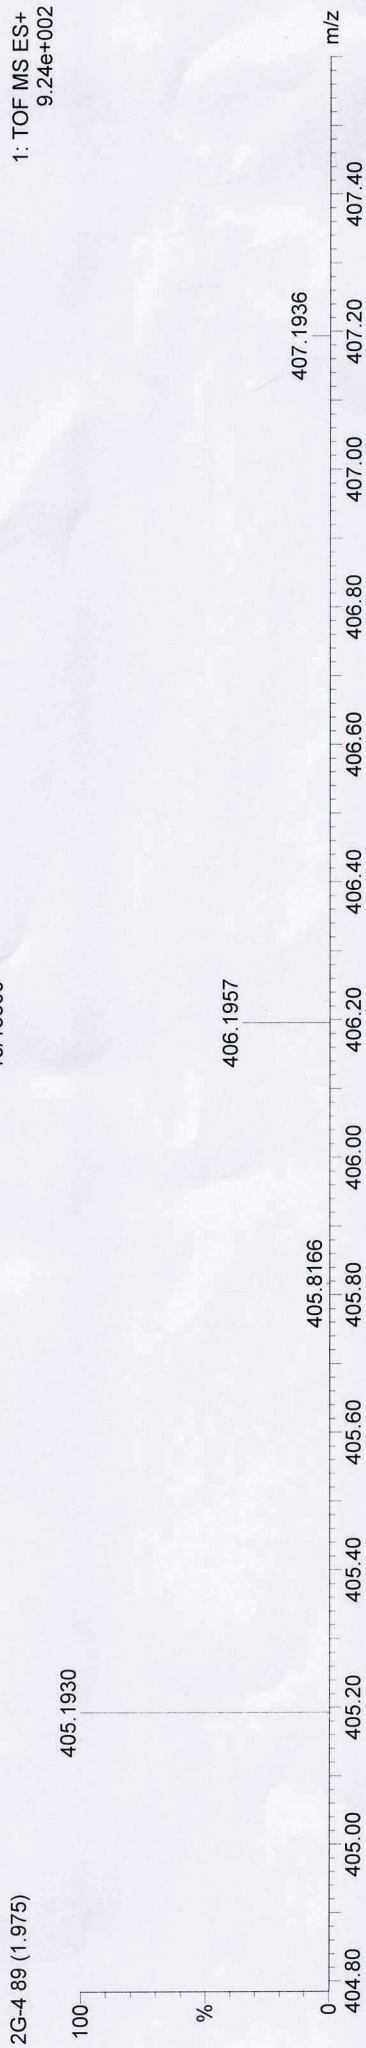

| Mass     | Calc. Mass | mDa | PPM | DBE  | i-FIT | Formula          |
|----------|------------|-----|-----|------|-------|------------------|
| 405.1930 | 405.1927   | 0.3 | 0.7 | 13.5 | 12.2  | C23 H25 N4 O3    |
|          | 405.1903   | 2.7 | 6.7 | 10.5 | 19.1  | C21 H26 N4 O3 Na |

Minimum: -1.5  
 Maximum: 50.0

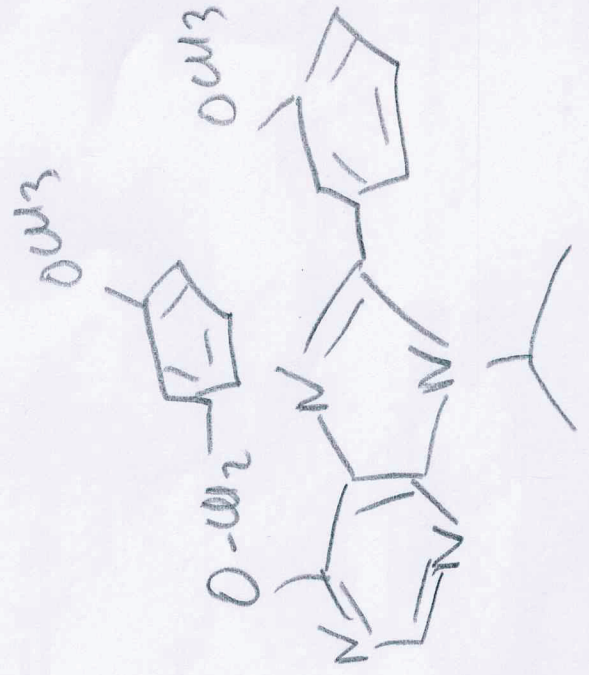

|                        |                                                                                   |                  |            |                      |       |
|------------------------|-----------------------------------------------------------------------------------|------------------|------------|----------------------|-------|
| Acquisition Time (sec) | 1.0486                                                                            | Date             | May 9 2013 |                      |       |
| File Name              | C:\Users\usuario\Documents\Espectros 2ª Gen-Asier\13-11181_2ASIMJ-1_500\CARBON_01 |                  |            |                      |       |
| Frequency (MHz)        | 125.68                                                                            | Nucleus          | 13C        | Number of Transients | 9600  |
| Original Points Count  | 32768                                                                             | Points Count     | 32768      | Pulse Sequence       | s2pul |
| Solvent                | CHLOROFORM-D                                                                      | Sweep Width (Hz) | 31250.00   |                      |       |
| Temperature (degree C) | 25.000                                                                            |                  |            |                      |       |

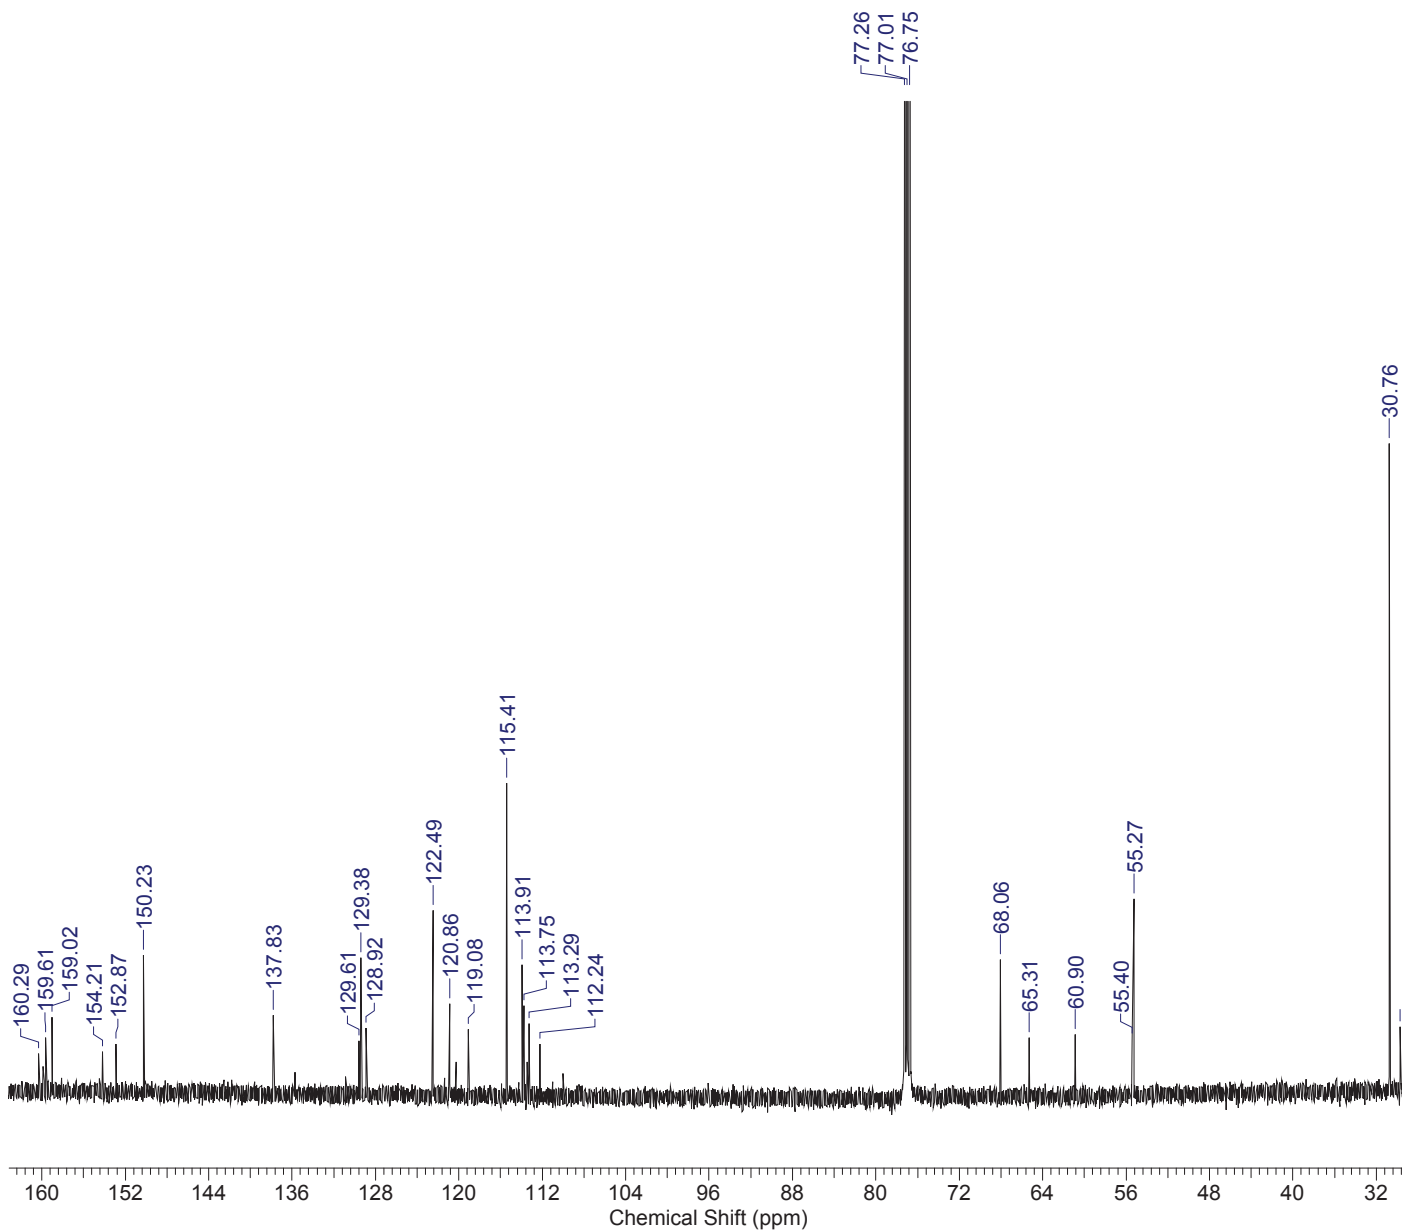

| No. | (ppm)  | (Hz)    | Height | No. | (ppm)  | (Hz)    | Height |
|-----|--------|---------|--------|-----|--------|---------|--------|
| 1   | 29.69  | 3732.2  | 0.0320 | 15  | 115.41 | 14505.2 | 0.1495 |
| 2   | 30.76  | 3865.7  | 0.3134 | 16  | 119.08 | 14966.8 | 0.0306 |
| 3   | 55.27  | 6946.1  | 0.0937 | 17  | 120.86 | 15190.0 | 0.0431 |
| 4   | 55.40  | 6963.3  | 0.0260 | 18  | 122.49 | 15395.0 | 0.0882 |
| 5   | 60.90  | 7653.8  | 0.0282 | 19  | 128.92 | 16203.7 | 0.0316 |
| 6   | 65.31  | 8207.9  | 0.0267 | 20  | 129.38 | 16261.0 | 0.0655 |
| 7   | 68.06  | 8554.1  | 0.0643 | 21  | 129.61 | 16289.6 | 0.0254 |
| 8   | 76.75  | 9646.1  | 0.9387 | 22  | 137.83 | 17323.4 | 0.0375 |
| 9   | 77.01  | 9678.5  | 1.0000 | 23  | 150.23 | 18881.7 | 0.0665 |
| 10  | 77.26  | 9710.0  | 0.9149 | 24  | 152.87 | 19213.6 | 0.0236 |
| 11  | 112.24 | 14106.5 | 0.0238 | 25  | 154.21 | 19381.5 | 0.0199 |
| 12  | 113.29 | 14239.1 | 0.0335 | 26  | 159.02 | 19986.1 | 0.0368 |
| 13  | 113.75 | 14296.3 | 0.0422 | 27  | 159.61 | 20060.5 | 0.0268 |
| 14  | 113.91 | 14317.3 | 0.0619 | 28  | 160.29 | 20146.3 | 0.0191 |

|                               |                                                                                 |                     |                         |                             |         |
|-------------------------------|---------------------------------------------------------------------------------|---------------------|-------------------------|-----------------------------|---------|
| <b>Acquisition Time (sec)</b> | 1.0486                                                                          | <b>Date</b>         | May 9 2013              |                             |         |
| <b>File Name</b>              | C:\Users\usuario\Documents\Espectros 2ª Gen-Asier\13-11181_2ASIMJ-1_500\DEPT_01 |                     |                         |                             |         |
| <b>Frequency (MHz)</b>        | 125.68                                                                          | <b>Nucleus</b>      | 13C                     | <b>Number of Transients</b> | 4800    |
| <b>Original Points Count</b>  | 32768                                                                           | <b>Points Count</b> | 32768                   | <b>Pulse Sequence</b>       | DEPT135 |
| <b>Solvent</b>                | CHLOROFORM-D                                                                    |                     | <b>Sweep Width (Hz)</b> | 31250.00                    |         |
| <b>Temperature (degree C)</b> | 25.000                                                                          |                     |                         |                             |         |

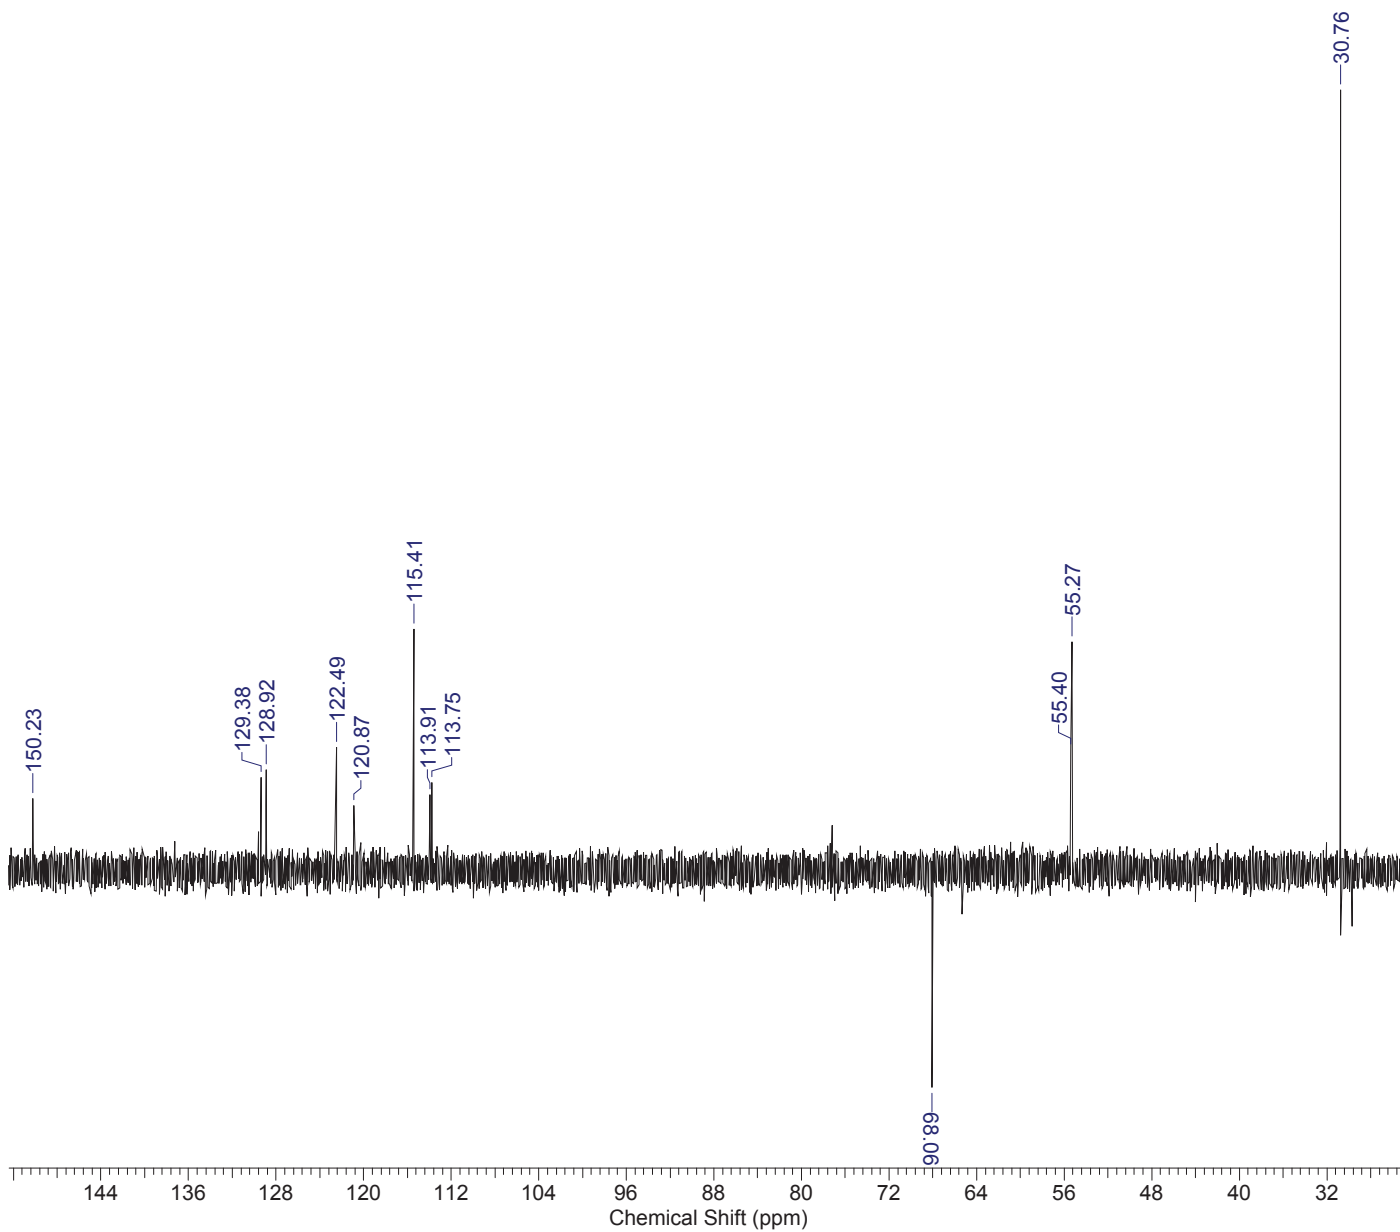

| No. | (ppm)  | (Hz)    | Height  |
|-----|--------|---------|---------|
| 1   | 30.76  | 3865.7  | 1.0000  |
| 2   | 55.27  | 6946.1  | 0.2925  |
| 3   | 55.40  | 6963.3  | 0.1543  |
| 4   | 68.06  | 8554.1  | -0.2783 |
| 5   | 113.75 | 14296.3 | 0.1128  |
| 6   | 113.91 | 14317.3 | 0.0972  |
| 7   | 115.41 | 14505.2 | 0.3092  |
| 8   | 120.87 | 15190.9 | 0.0830  |
| 9   | 122.49 | 15395.0 | 0.1573  |
| 10  | 128.92 | 16203.7 | 0.1286  |
| 11  | 129.38 | 16261.0 | 0.1188  |
| 12  | 150.23 | 18881.7 | 0.0920  |

|                        |                                                                            |                  |            |                      |       |
|------------------------|----------------------------------------------------------------------------|------------------|------------|----------------------|-------|
| Acquisition Time (sec) | 2.5559                                                                     | Date             | May 7 2013 |                      |       |
| File Name              | C:\Users\usuario\Documents\Espectros 2ª Gen-Asier\13-11181_2ASIMJ-1\proton |                  |            |                      |       |
| Frequency (MHz)        | 400.57                                                                     | Nucleus          | 1H         | Number of Transients | 8     |
| Original Points Count  | 16384                                                                      | Points Count     | 16384      | Pulse Sequence       | s2pul |
| Solvent                | CHLOROFORM-D                                                               | Sweep Width (Hz) | 6410.26    |                      |       |
| Temperature (degree C) | 30.000                                                                     |                  |            |                      |       |

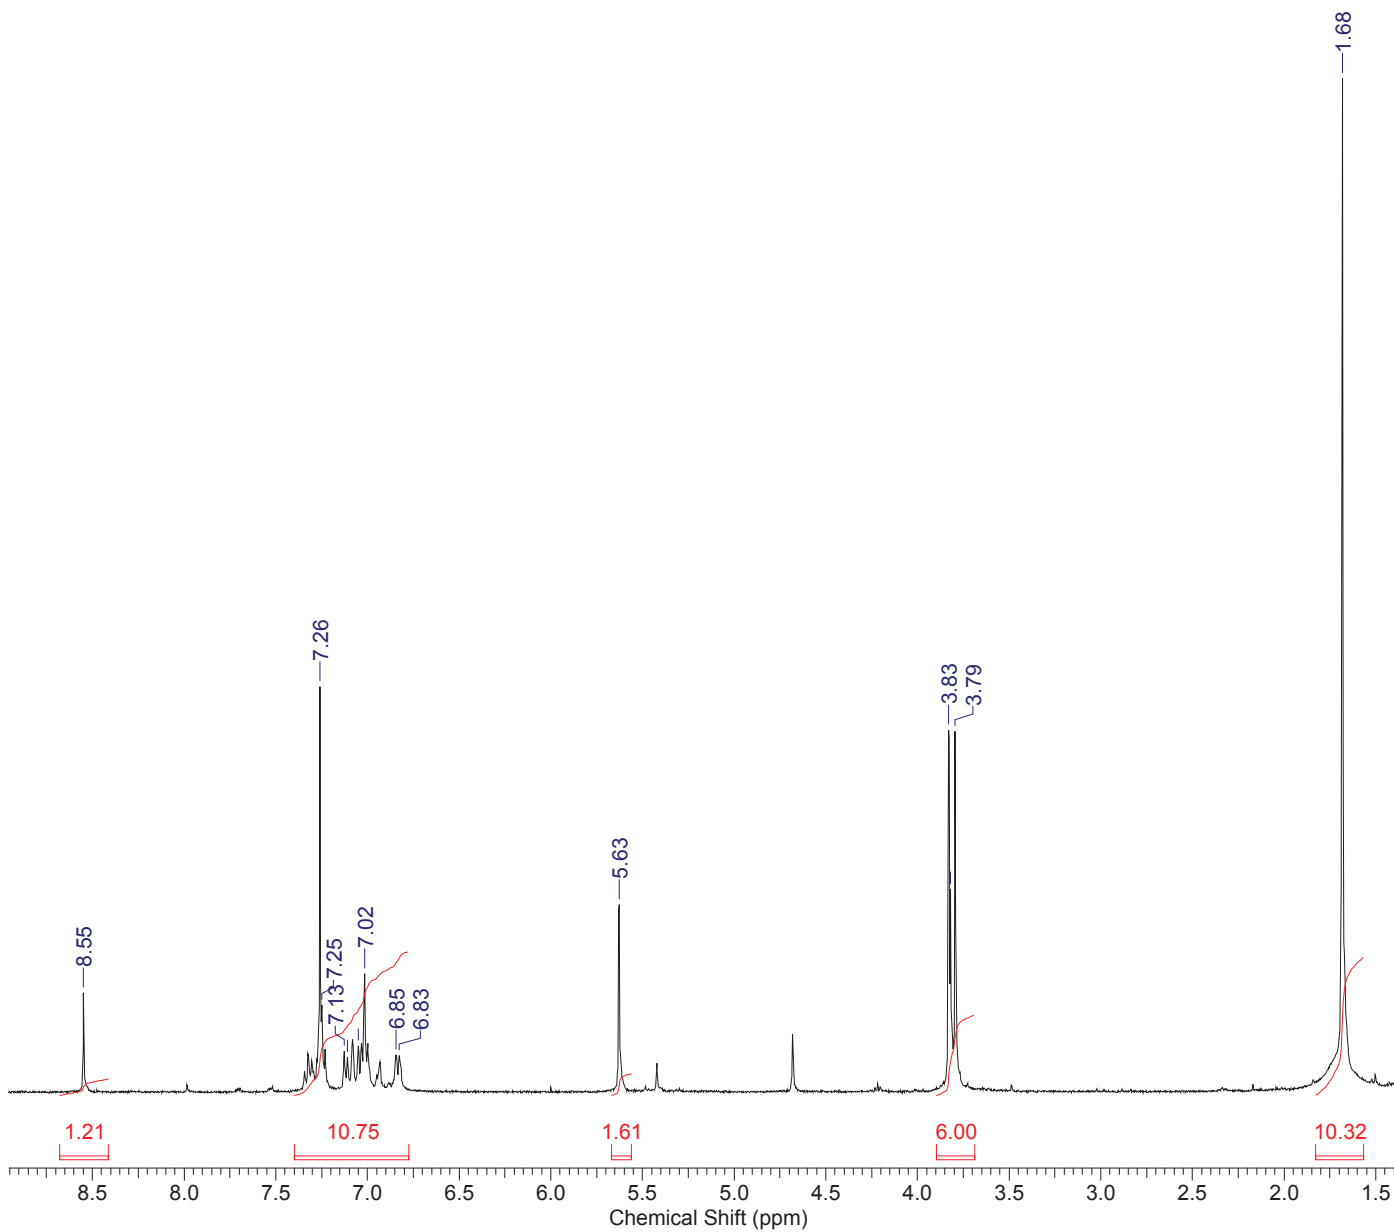

| No. | (ppm) | (Hz)   | Height |
|-----|-------|--------|--------|
| 1   | 0.07  | 27.3   | 0.0985 |
| 2   | 1.68  | 674.1  | 1.0000 |
| 3   | 3.79  | 1519.7 | 0.3582 |
| 4   | 3.82  | 1529.8 | 0.2027 |
| 5   | 3.83  | 1533.7 | 0.3594 |
| 6   | 5.63  | 2254.1 | 0.1875 |
| 7   | 6.83  | 2734.2 | 0.0392 |
| 8   | 6.85  | 2742.0 | 0.0397 |
| 9   | 7.02  | 2810.1 | 0.1198 |
| 10  | 7.05  | 2824.2 | 0.0487 |
| 11  | 7.11  | 2846.9 | 0.0375 |
| 12  | 7.13  | 2854.7 | 0.0438 |
| 13  | 7.25  | 2903.6 | 0.0888 |
| 14  | 7.26  | 2907.9 | 0.4022 |
| 15  | 8.55  | 3424.4 | 0.1006 |

| No. | (ppm)          | Value  | Absolute Value |
|-----|----------------|--------|----------------|
| 1   | [1.57 .. 1.83] | 10.325 | 4.28525e+8     |
| 2   | [3.69 .. 3.90] | 6.000  | 2.49022e+8     |
| 3   | [5.56 .. 5.67] | 1.614  | 6.70018e+7     |
| 4   | [6.77 .. 7.40] | 10.753 | 4.46282e+8     |
| 5   | [8.41 .. 8.68] | 1.215  | 5.04239e+7     |

Elemental Composition Report

Single Mass Analysis

Tolerance = 5.0 mDa / DBE: min = -1.5, max = 50.0  
 Element prediction: Off  
 Number of isotope peaks used for i-FIT = 3

Monoisotopic Mass, Even Electron Ions  
 468 formula(e) evaluated with 6 results within limits (up to 50 best isotopic matches for each mass)  
 Elements Used:

C: 0-24 H: 0-1000 N: 0-8 O: 0-7 Na: 0-1

1: TOF MS ES+

MJN 40 (0.880)

1.03e+002

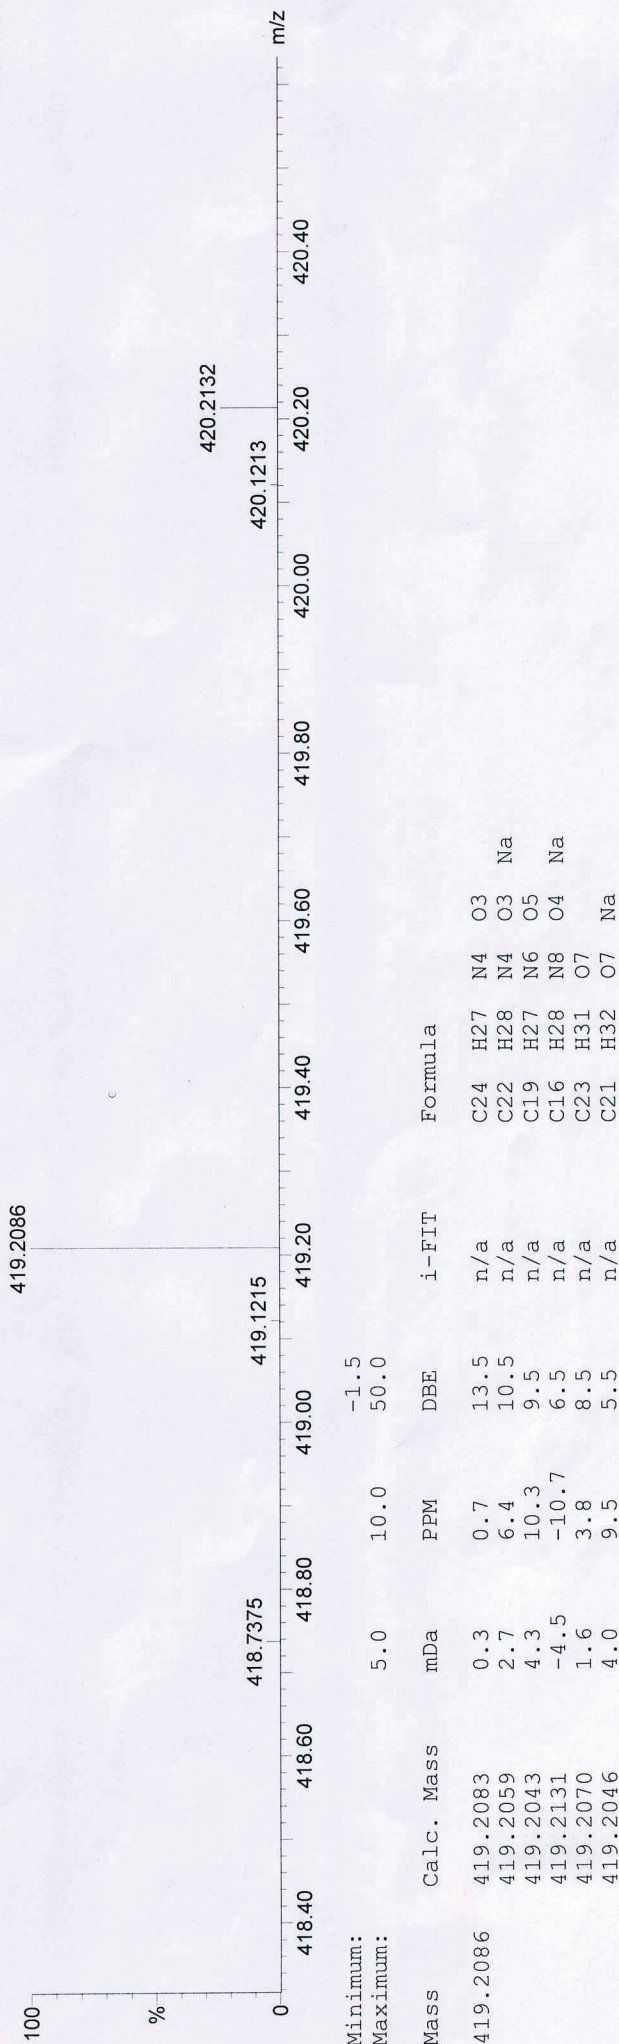

Minimum:  
Maximum:

| Mass     | Calc. Mass | mDa  | PPM   | DBE  | i-FIT | Formula          |
|----------|------------|------|-------|------|-------|------------------|
| 419.2086 | 419.2083   | 0.3  | 0.7   | 13.5 | n/a   | C24 H27 N4 O3    |
|          | 419.2059   | 2.7  | 6.4   | 10.5 | n/a   | C22 H28 N4 O3 Na |
|          | 419.2043   | 4.3  | 10.3  | 9.5  | n/a   | C19 H27 N6 O5    |
|          | 419.2131   | -4.5 | -10.7 | 6.5  | n/a   | C16 H28 N8 O4 Na |
|          | 419.2070   | 1.6  | 3.8   | 8.5  | n/a   | C23 H31 O7       |
|          | 419.2046   | 4.0  | 9.5   | 5.5  | n/a   | C21 H32 O7 Na    |

B5. 9-isopropyl-6-methoxy-9H-purine (H-NMR)

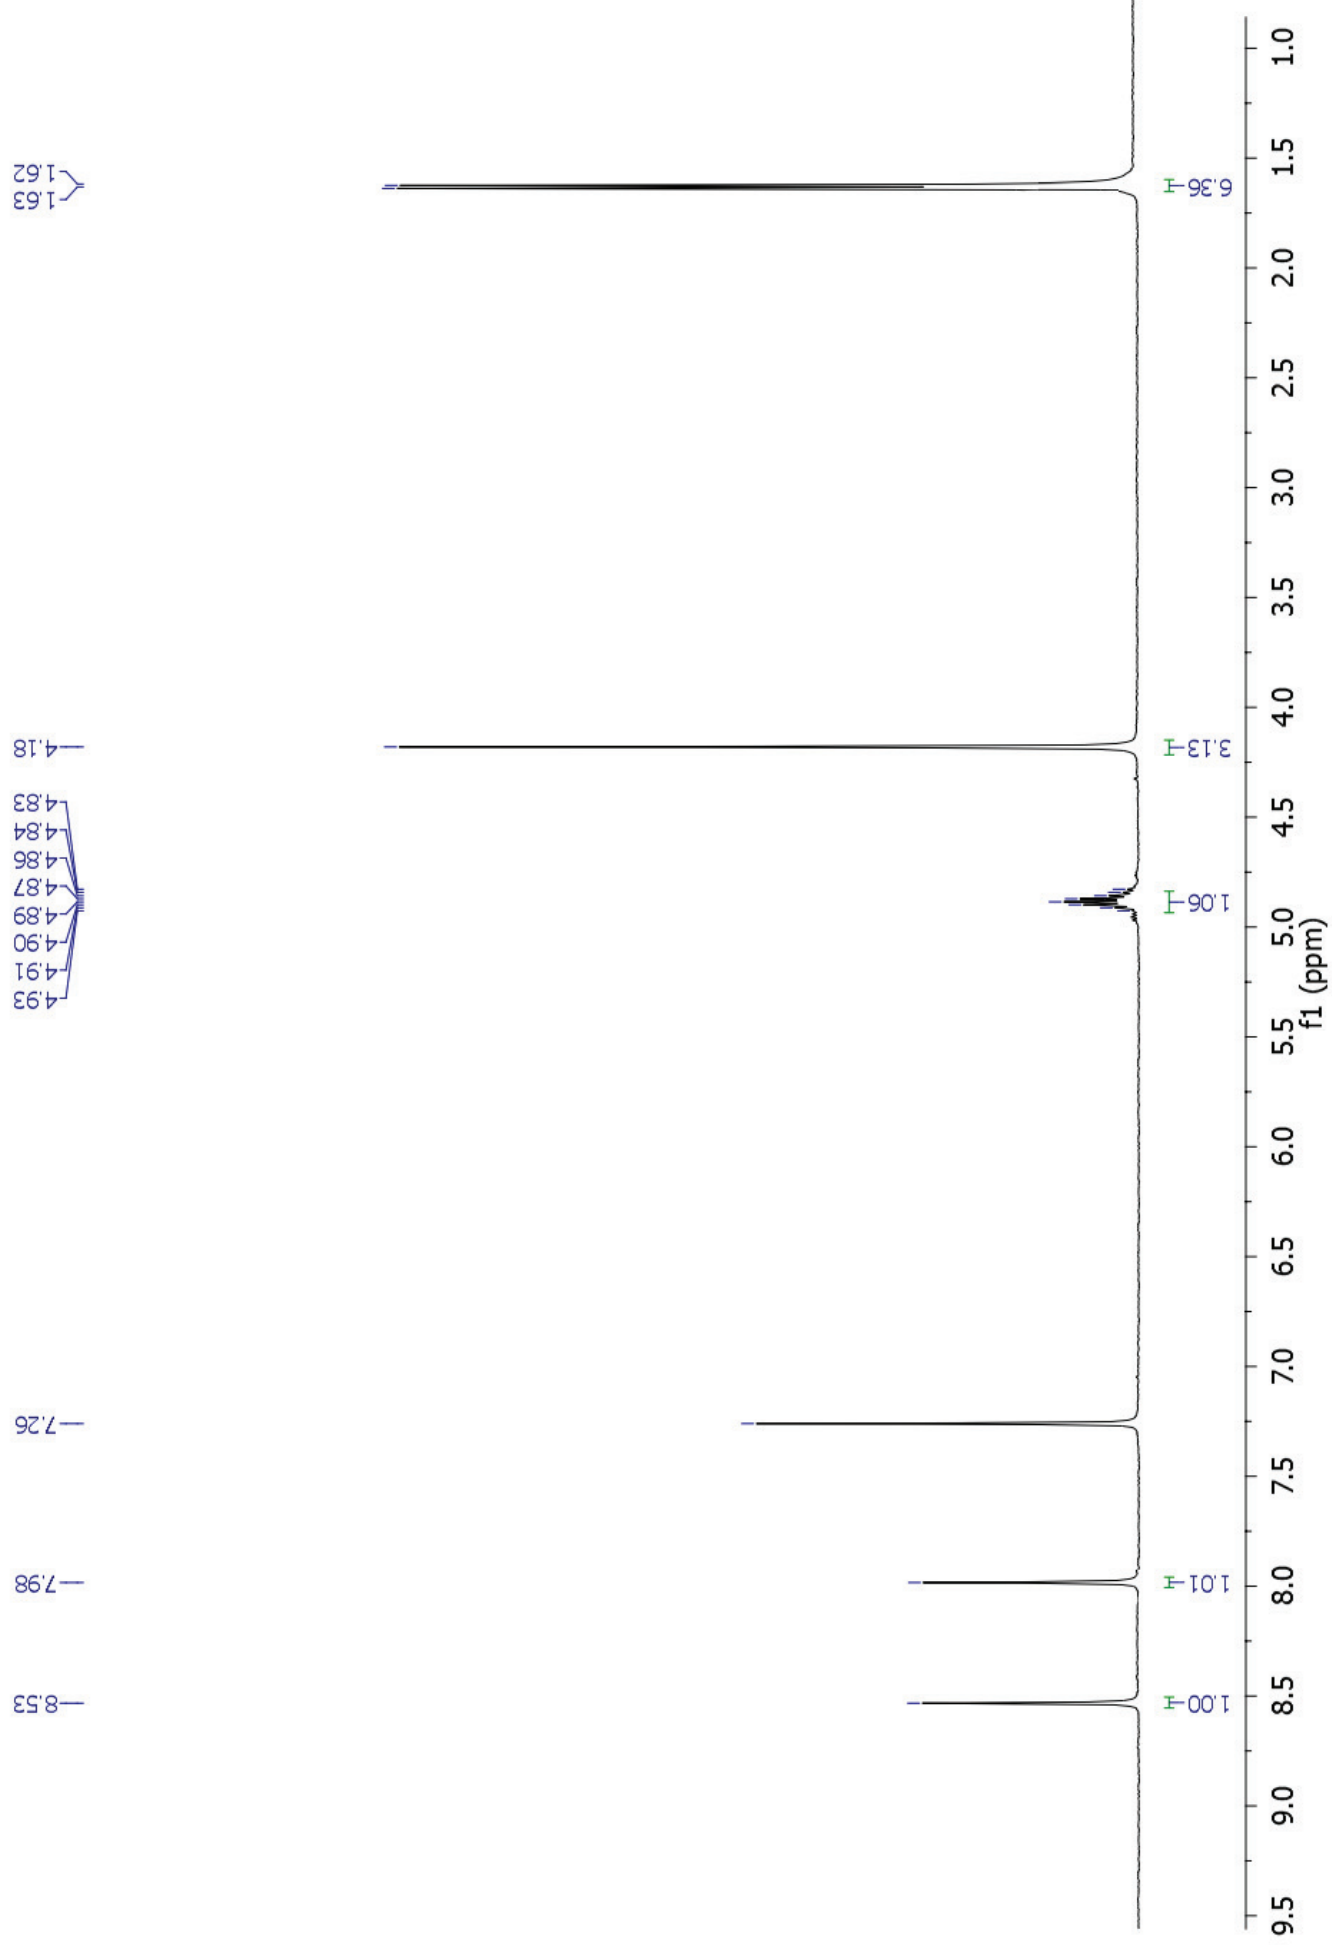

**Elemental Composition Report**

**Single Mass Analysis**

Tolerance = 5.0 PPM / DBE: min = -1.5, max = 50.0  
 Element prediction: Off  
 Number of isotope peaks used for i-FIT = 3

Monoisotopic Mass, Even Electron Ions  
 729 formula(e) evaluated with 1 results within limits (up to 50 closest results for each mass)  
 Elements Used:

C: 0-14 H: 0-1000 N: 0-5 O: 0-5 Na: 0-1 S: 0-1 Cl: 0-1 Br: 0-2

21 43 (0.951)

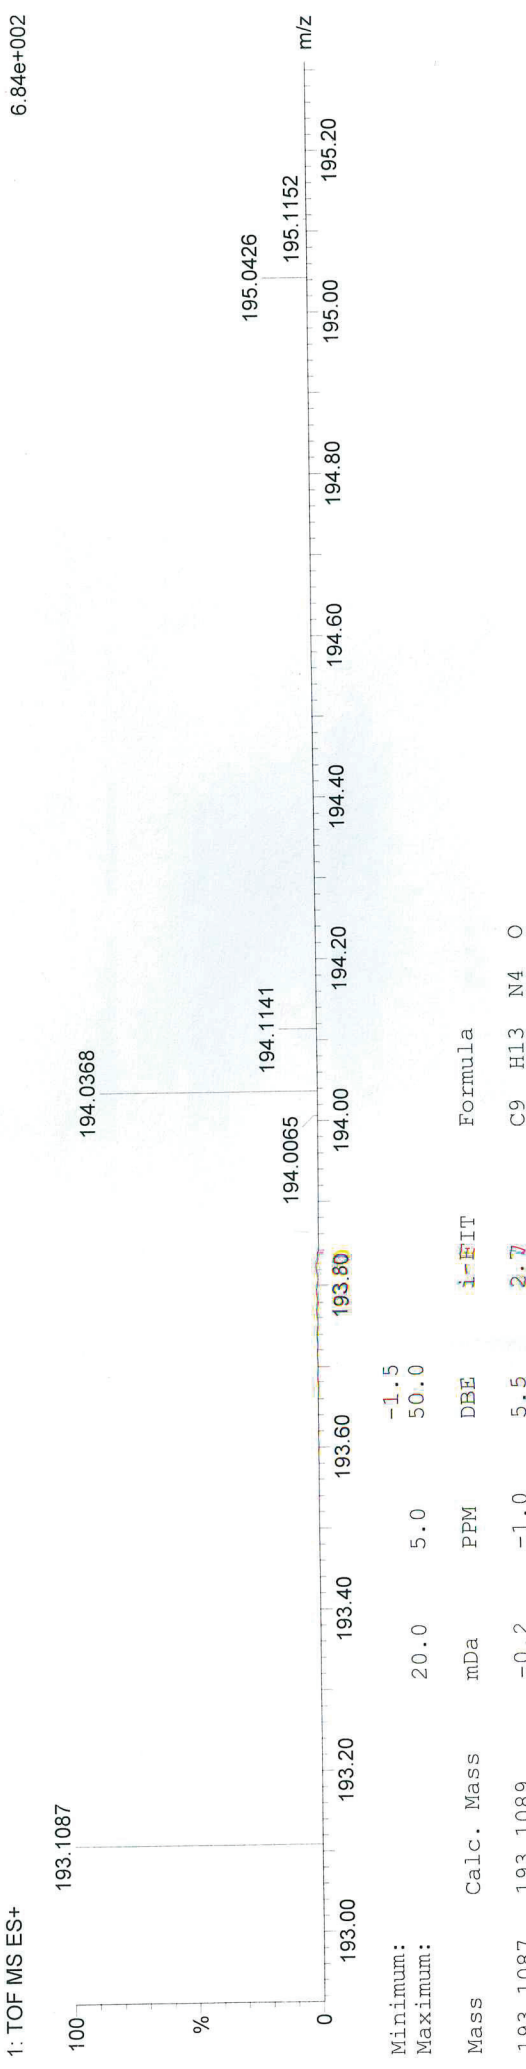

Minimum: -1.5  
 Maximum: 50.0

| Mass     | Calc. Mass | mDa  | PPM  | DBE | i-FIT | Formula     |
|----------|------------|------|------|-----|-------|-------------|
| 193.1087 | 193.1089   | -0.2 | -1.0 | 5.5 | 2.7   | C9 H13 N4 O |

B5. 9-Isopropyl-6-methoxy-9H-purine (C-NMR)

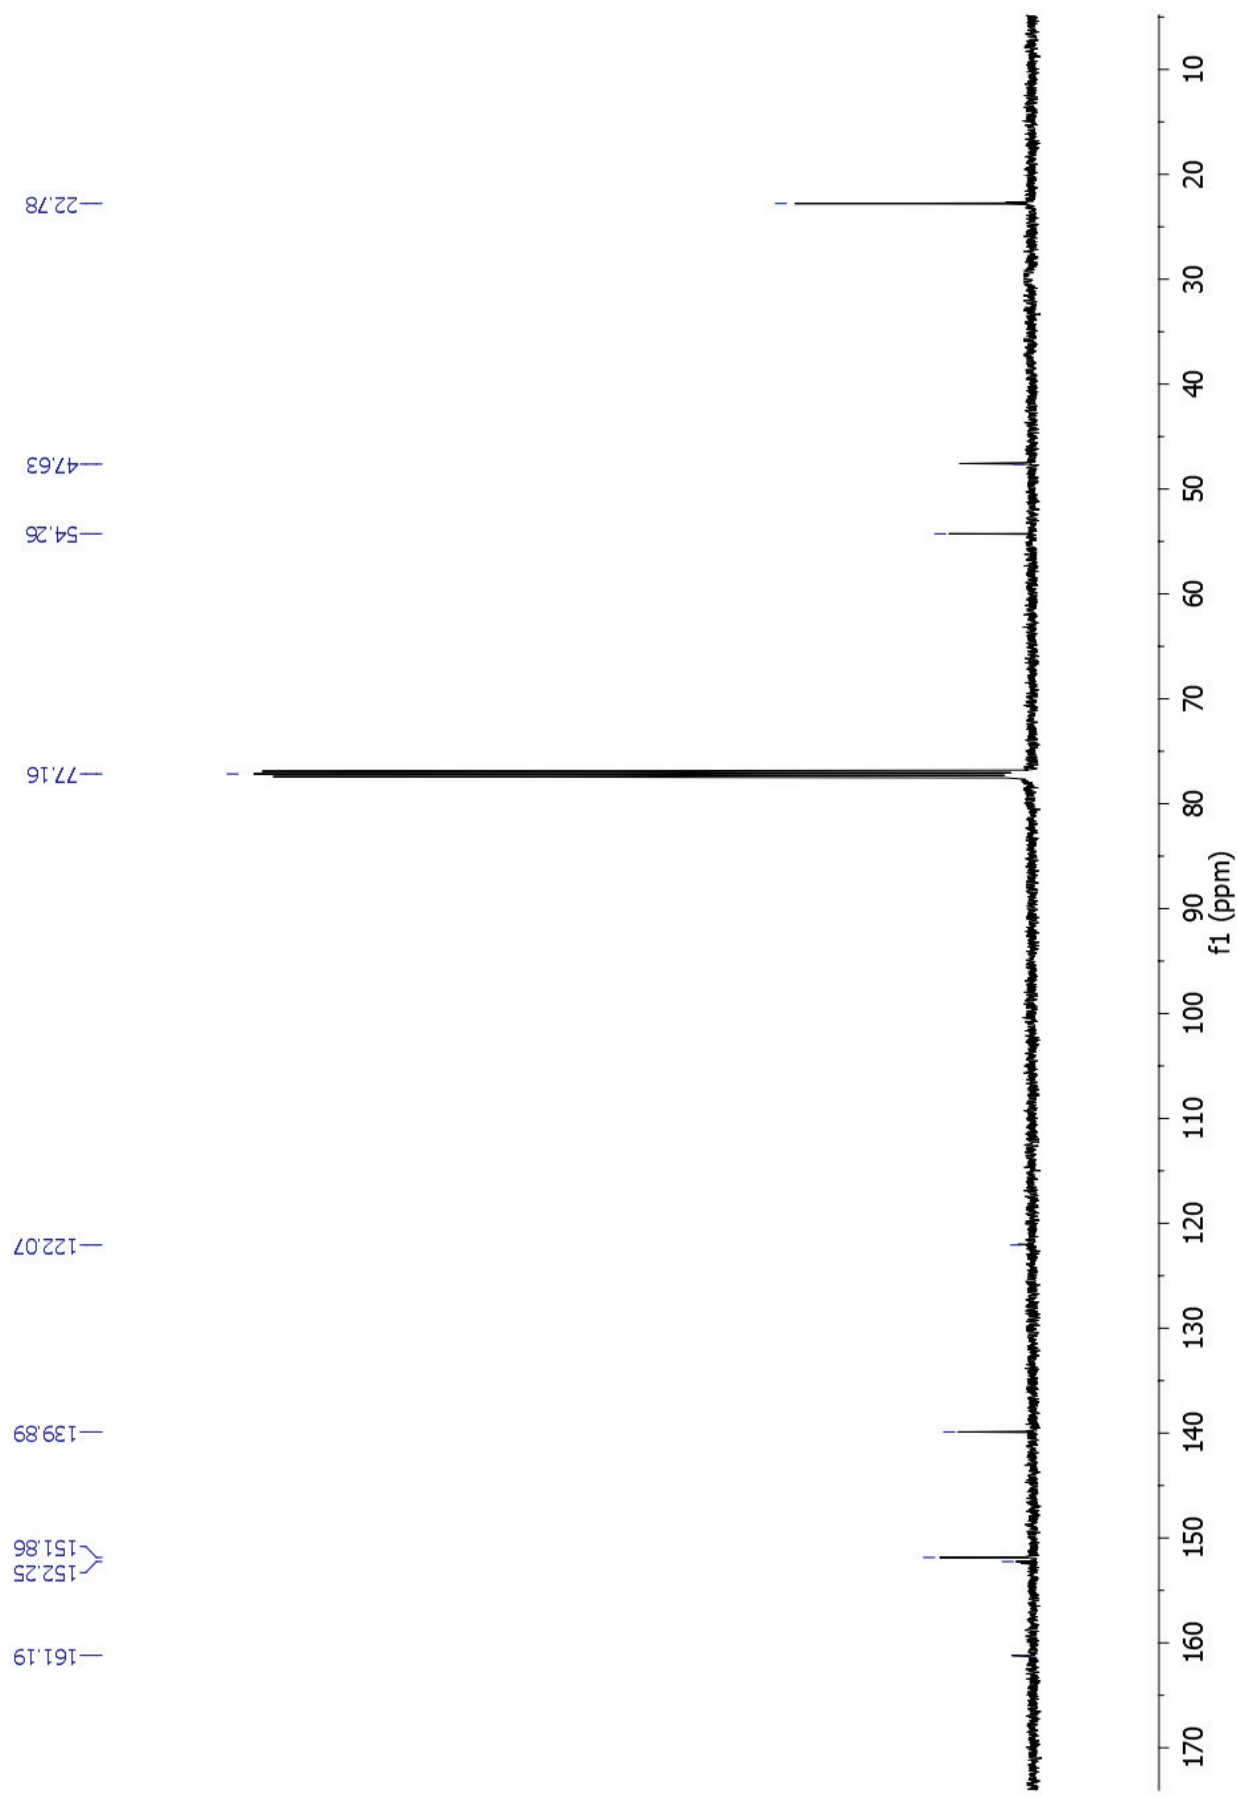



|                        |                                                                         |                  |            |                      |       |
|------------------------|-------------------------------------------------------------------------|------------------|------------|----------------------|-------|
| Acquisition Time (sec) | 2.0447                                                                  | Date             | Jun 8 2012 |                      |       |
| File Name              | C:\Users\usuario\Documents\Espectros Asier\12-11090 ASIMJ-3NP\PROTON_01 |                  |            |                      |       |
| Frequency (MHz)        | 499.79                                                                  | Nucleus          | 1H         | Number of Transients | 8     |
| Original Points Count  | 16384                                                                   | Points Count     | 16384      | Pulse Sequence       | s2pul |
| Solvent                | CHLOROFORM-D                                                            | Sweep Width (Hz) | 8012.82    |                      |       |
| Temperature (degree C) | 25.000                                                                  |                  |            |                      |       |

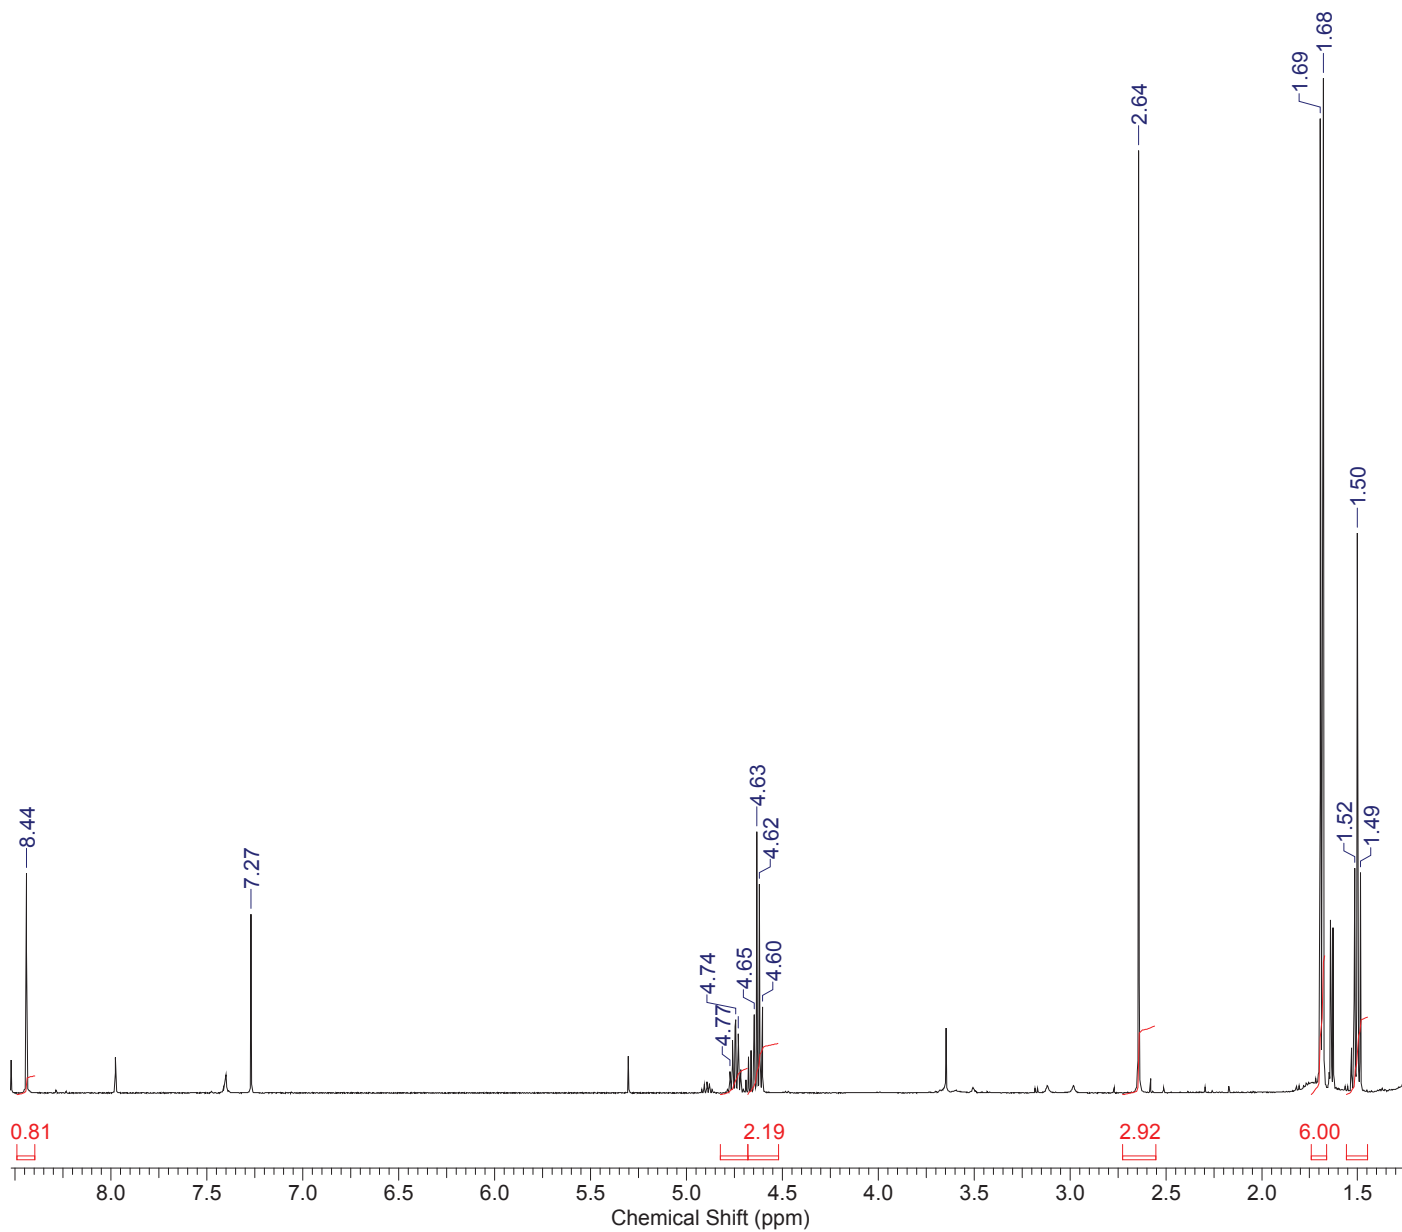

| No. | (ppm) | (Hz)   | Height |
|-----|-------|--------|--------|
| 1   | 1.49  | 742.7  | 0.2185 |
| 2   | 1.50  | 750.1  | 0.5522 |
| 3   | 1.52  | 757.4  | 0.2229 |
| 4   | 1.68  | 839.6  | 1.0000 |
| 5   | 1.69  | 846.4  | 0.9601 |
| 6   | 2.64  | 1320.8 | 0.9286 |
| 7   | 4.60  | 2301.0 | 0.0863 |
| 8   | 4.62  | 2308.3 | 0.2071 |
| 9   | 4.63  | 2315.2 | 0.2585 |
| 10  | 4.65  | 2322.5 | 0.0785 |
| 11  | 4.73  | 2364.1 | 0.0599 |
| 12  | 4.74  | 2370.9 | 0.0736 |
| 13  | 4.77  | 2385.1 | 0.0228 |
| 14  | 7.27  | 3634.2 | 0.1774 |
| 15  | 8.44  | 4218.7 | 0.2174 |

| No. | (ppm)          | Value | Absolute Value |
|-----|----------------|-------|----------------|
| 1   | [1.45 .. 1.56] | 3.311 | 1.98984e+8     |
| 2   | [1.66 .. 1.74] | 6.000 | 3.60639e+8     |
| 3   | [2.55 .. 2.72] | 2.923 | 1.75698e+8     |
| 4   | [4.52 .. 4.68] | 2.188 | 1.31488e+8     |
| 5   | [4.68 .. 4.82] | 1.122 | 6.74613e+7     |
| 6   | [8.40 .. 8.49] | 0.805 | 4.83939e+7     |

|                               |                                                                         |                     |                         |                             |       |
|-------------------------------|-------------------------------------------------------------------------|---------------------|-------------------------|-----------------------------|-------|
| <b>Acquisition Time (sec)</b> | 1.0486                                                                  | <b>Date</b>         | Jun 8 2012              |                             |       |
| <b>File Name</b>              | C:\Users\usuario\Documents\Espectros Asier\12-11090 ASIMJ-3NP\CARBON_01 |                     |                         |                             |       |
| <b>Frequency (MHz)</b>        | 125.68                                                                  | <b>Nucleus</b>      | 13C                     | <b>Number of Transients</b> | 9600  |
| <b>Original Points Count</b>  | 32768                                                                   | <b>Points Count</b> | 32768                   | <b>Pulse Sequence</b>       | s2pul |
| <b>Solvent</b>                | CHLOROFORM-D                                                            |                     | <b>Sweep Width (Hz)</b> | 31250.00                    |       |
| <b>Temperature (degree C)</b> | 25.000                                                                  |                     |                         |                             |       |

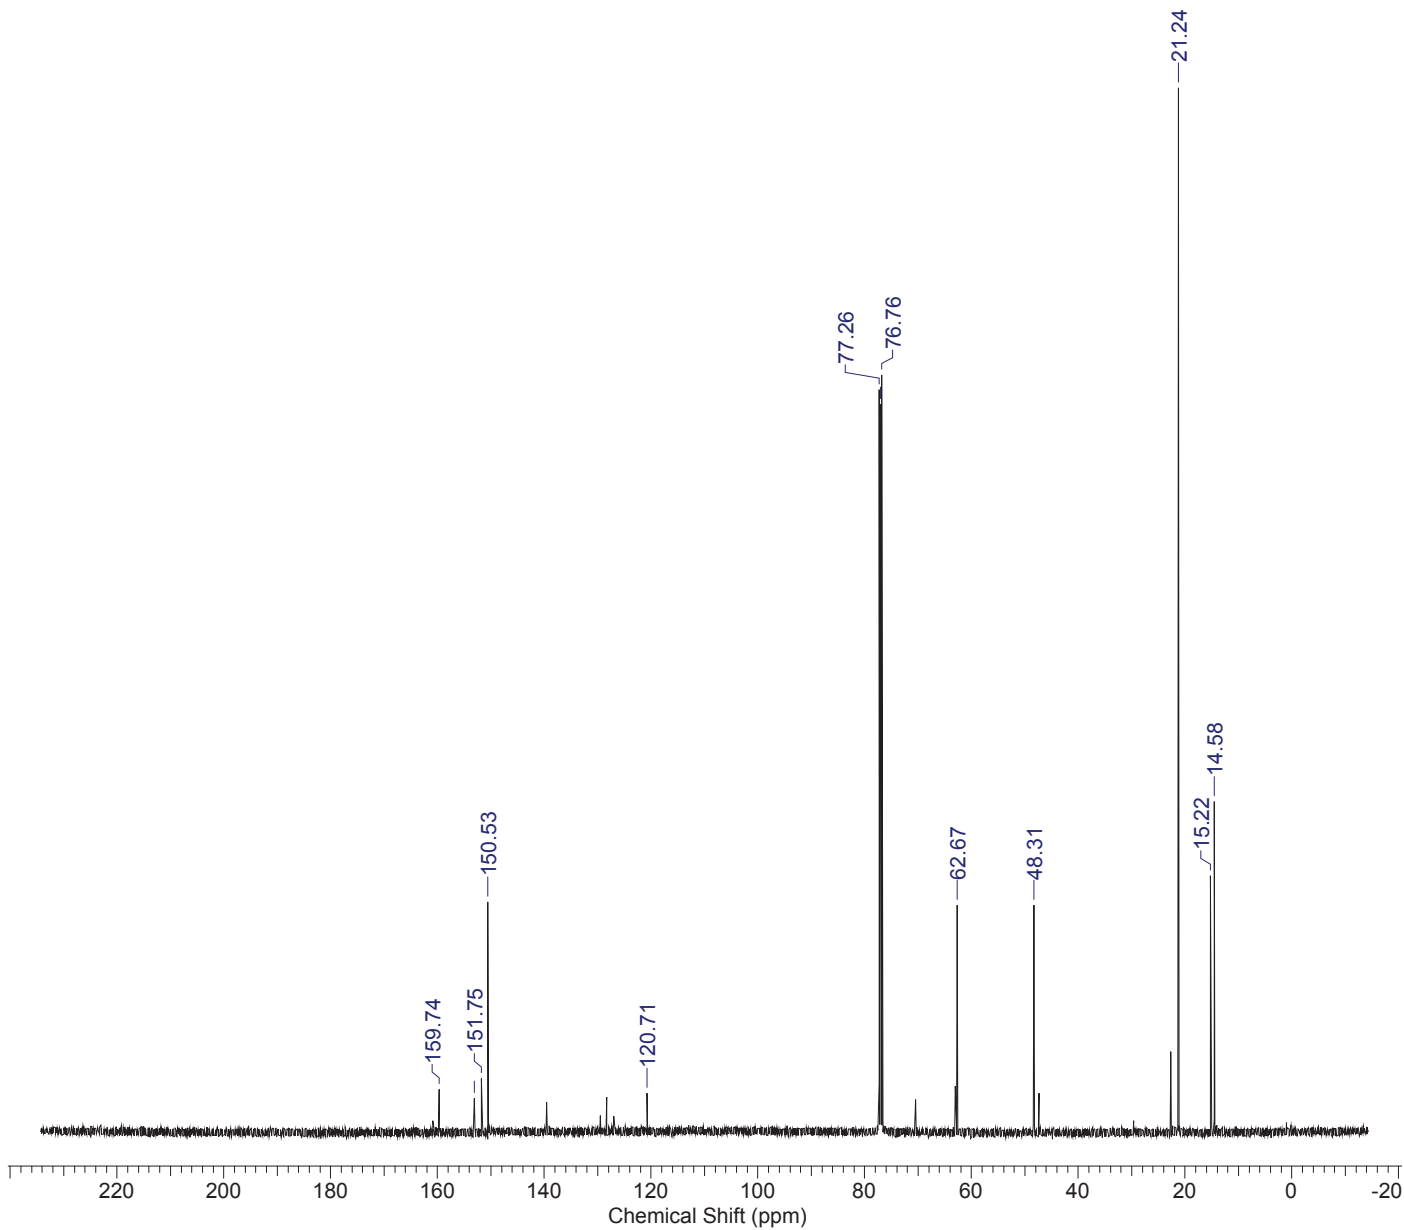

| No. | (ppm)  | (Hz)    | Height |
|-----|--------|---------|--------|
| 1   | 14.58  | 1832.4  | 0.3162 |
| 2   | 15.22  | 1912.5  | 0.2453 |
| 3   | 21.24  | 2669.7  | 1.0000 |
| 4   | 48.31  | 6071.6  | 0.2170 |
| 5   | 62.67  | 7877.0  | 0.2167 |
| 6   | 76.76  | 9647.0  | 0.7249 |
| 7   | 77.01  | 9678.5  | 0.6964 |
| 8   | 77.26  | 9710.9  | 0.7109 |
| 9   | 120.71 | 15171.8 | 0.0363 |
| 10  | 150.53 | 18918.9 | 0.2196 |
| 11  | 151.75 | 19072.5 | 0.0509 |
| 12  | 153.15 | 19248.9 | 0.0315 |
| 13  | 159.74 | 20076.7 | 0.0403 |

|                               |                                                                       |                     |                         |                             |         |
|-------------------------------|-----------------------------------------------------------------------|---------------------|-------------------------|-----------------------------|---------|
| <b>Acquisition Time (sec)</b> | 1.0486                                                                | <b>Date</b>         | Jun 8 2012              |                             |         |
| <b>File Name</b>              | C:\Users\usuario\Documents\Espectros Asier\12-11090 ASIMJ-3NP\DEPT_01 |                     |                         |                             |         |
| <b>Frequency (MHz)</b>        | 125.68                                                                | <b>Nucleus</b>      | 13C                     | <b>Number of Transients</b> | 4800    |
| <b>Original Points Count</b>  | 32768                                                                 | <b>Points Count</b> | 32768                   | <b>Pulse Sequence</b>       | DEPT135 |
| <b>Solvent</b>                | CHLOROFORM-D                                                          |                     | <b>Sweep Width (Hz)</b> | 31250.00                    |         |
| <b>Temperature (degree C)</b> | 25.000                                                                |                     |                         |                             |         |

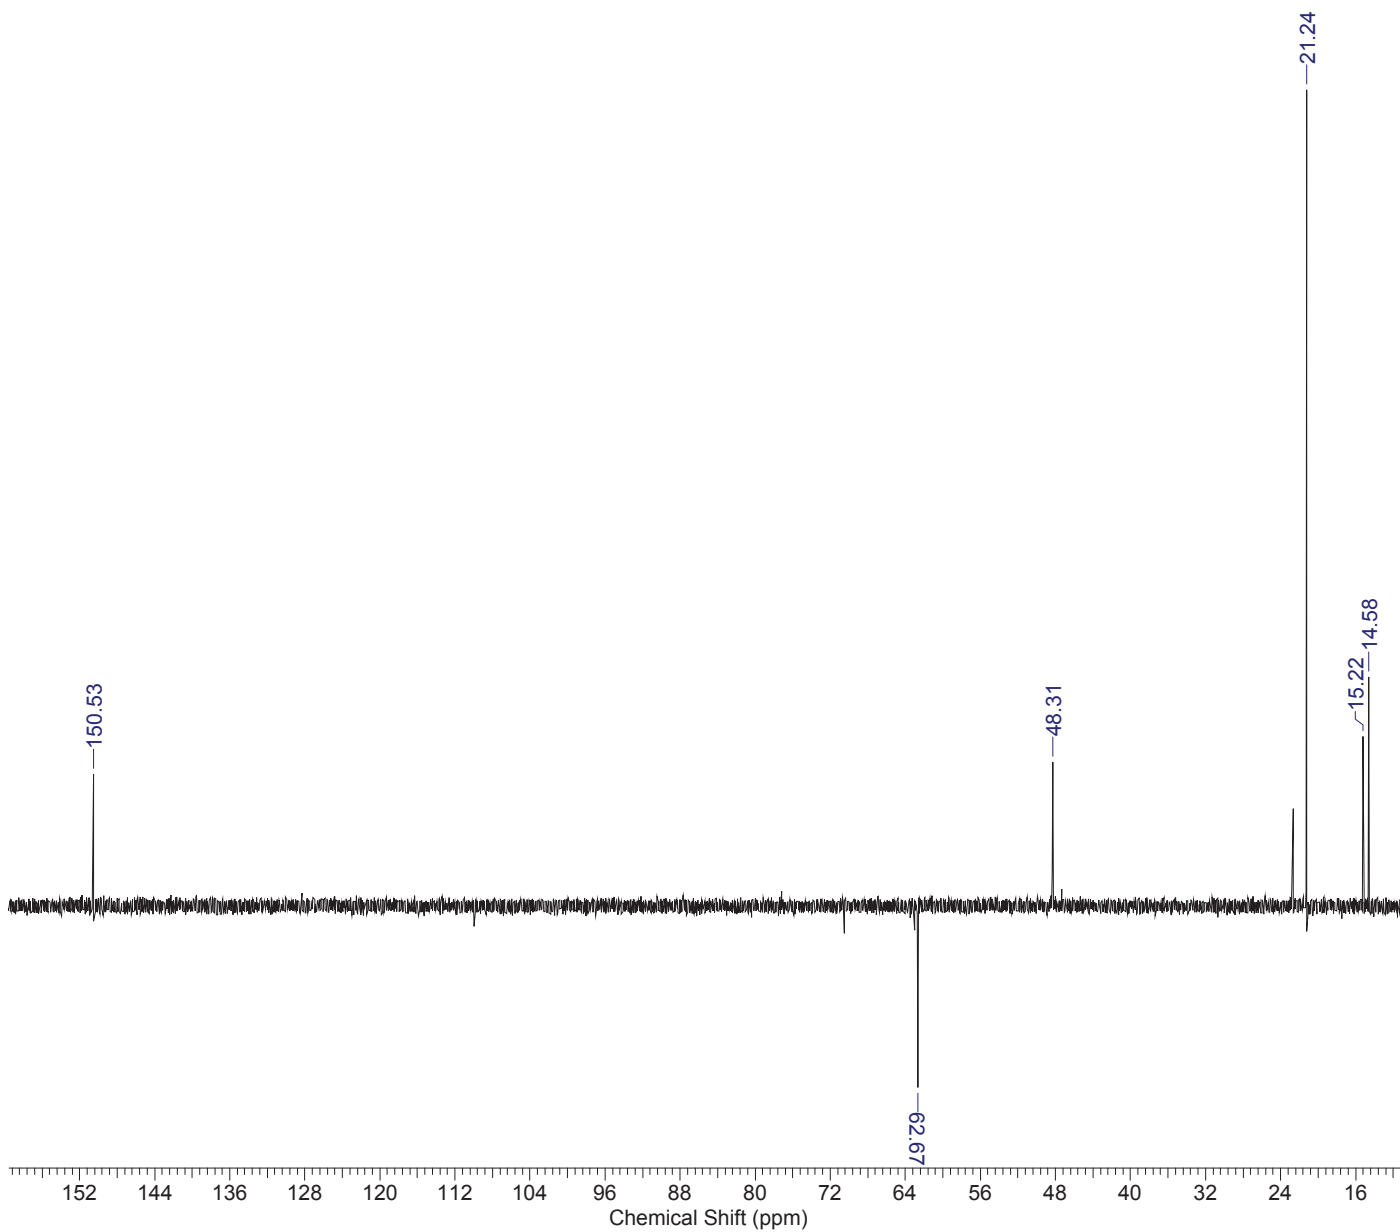

| No. | (ppm)  | (Hz)    | Height  |
|-----|--------|---------|---------|
| 1   | 14.58  | 1832.4  | 0.2804  |
| 2   | 15.22  | 1913.4  | 0.2078  |
| 3   | 21.24  | 2669.7  | 1.0000  |
| 4   | 48.31  | 6071.6  | 0.1761  |
| 5   | 62.67  | 7877.0  | -0.2224 |
| 6   | 150.53 | 18918.9 | 0.1615  |

**Single Mass Analysis**

Tolerance = 5.0 PPM / DBE: min = -1.5, max = 50.0

Element prediction: Off

Number of isotope peaks used for i-FIT = 3

Monoisotopic Mass, Even Electron Ions

279 formula(e) evaluated with 1 results within limits (up to 50 closest results for each mass)

Elements Used:

C: 0-20 H: 0-1000 N: 0-6 O: 0-7 Na: 0-1

MJ-3NP 6 (0.141)

1: TOF MS ES+  
1.31e+003

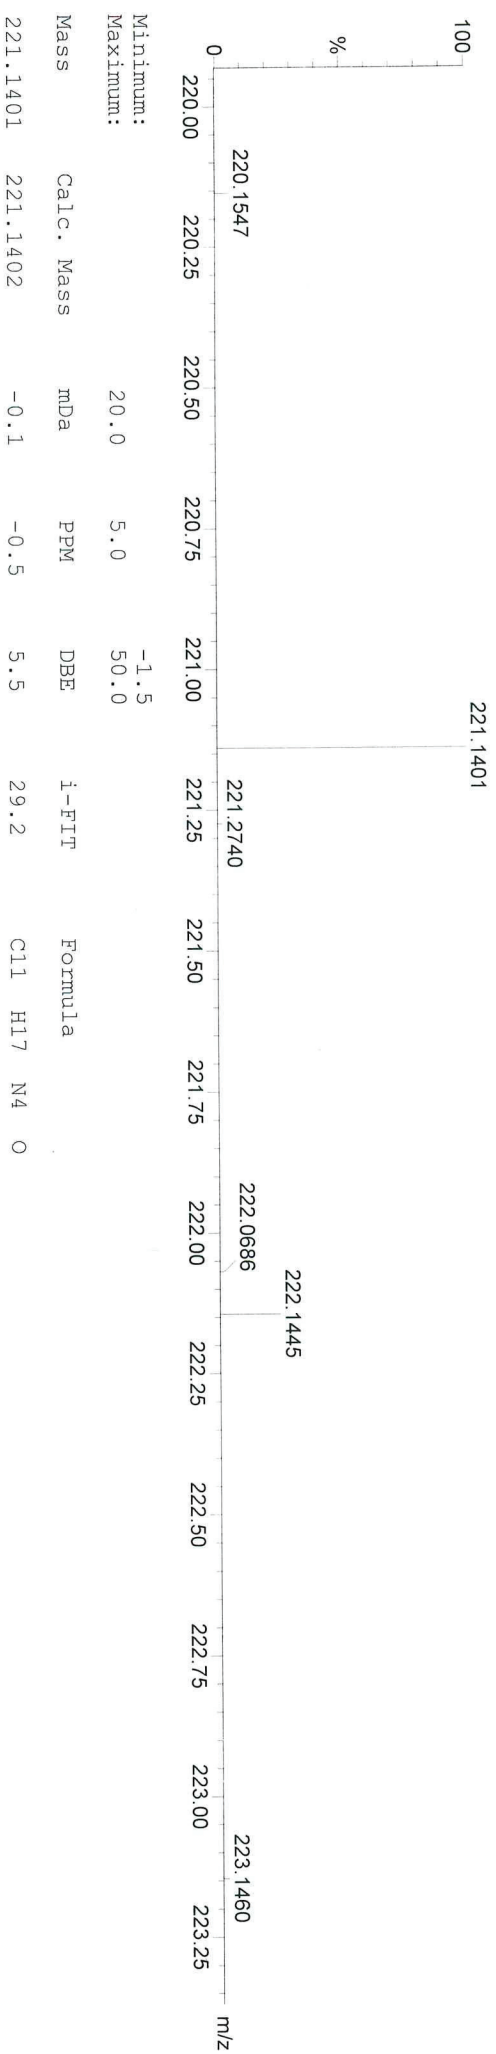

| Mass     | Calc. Mass | mDa  | PPM  | DBE | i-FIT | Formula      |
|----------|------------|------|------|-----|-------|--------------|
| 221.1401 | 221.1402   | -0.1 | -0.5 | 5.5 | 29.2  | C11 H17 N4 O |

**Elemental Composition Report**

**Single Mass Analysis**

Tolerance = 5.0 PPM / DBE: min = -1.5, max = 50.0  
 Element prediction: Off  
 Number of isotope peaks used for i-FIT = 3

Monoisotopic Mass, Even Electron Ions  
 398 formula(e) evaluated with 2 results within limits (up to 50 best isotopic matches for each mass)  
 Elements Used:

C: 0-22 H: 0-1000 N: 0-5 O: 0-6 F: 0-3

12/3291

1: TOF MS ES+  
 4.26e+002

ASIMJ-3 7 (0.163)

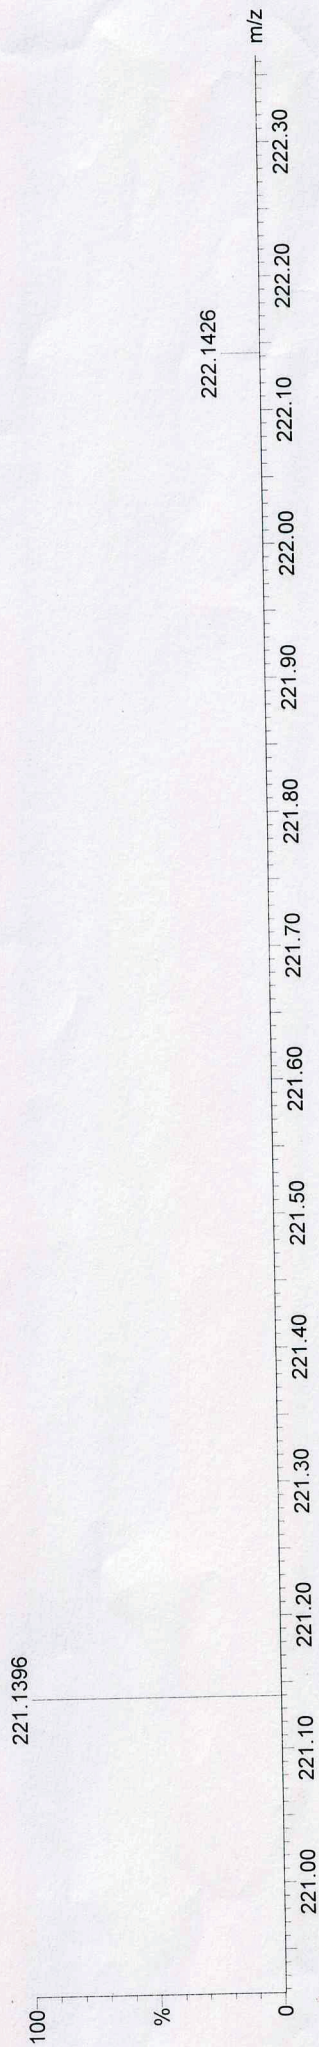

| Mass     | Calc. Mass | mDa  | PPM  | DBE | i-FIT | Formula      |
|----------|------------|------|------|-----|-------|--------------|
| 221.1396 | 221.1402   | -0.6 | -2.7 | 5.5 | n/a   | C11 H17 N4 O |
| 221.1389 | 221.1389   | 0.7  | 3.2  | 0.5 | n/a   | C10 H21 O5   |

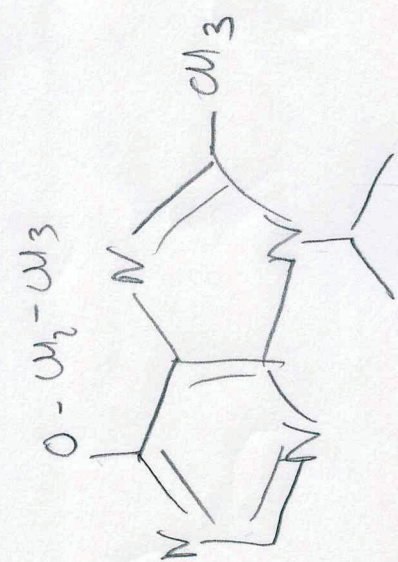



|                        |                                                                     |                  |          |                      |             |
|------------------------|---------------------------------------------------------------------|------------------|----------|----------------------|-------------|
| Acquisition Time (sec) | 1.3005                                                              | Comment          | MJ-A2    | Date                 | Sep 20 2012 |
| File Name              | C:\Users\usuario\Documents\Espectros Asier\12-20186 MJ-A2\13C-MJ-A2 |                  |          |                      |             |
| Frequency (MHz)        | 75.49                                                               | Nucleus          | 13C      | Number of Transients | 16000       |
| Original Points Count  | 23559                                                               | Points Count     | 32768    | Pulse Sequence       | s2pul       |
| Solvent                | CHLOROFORM-D                                                        | Sweep Width (Hz) | 18115.94 |                      |             |
| Temperature (degree C) | 30.000                                                              |                  |          |                      |             |

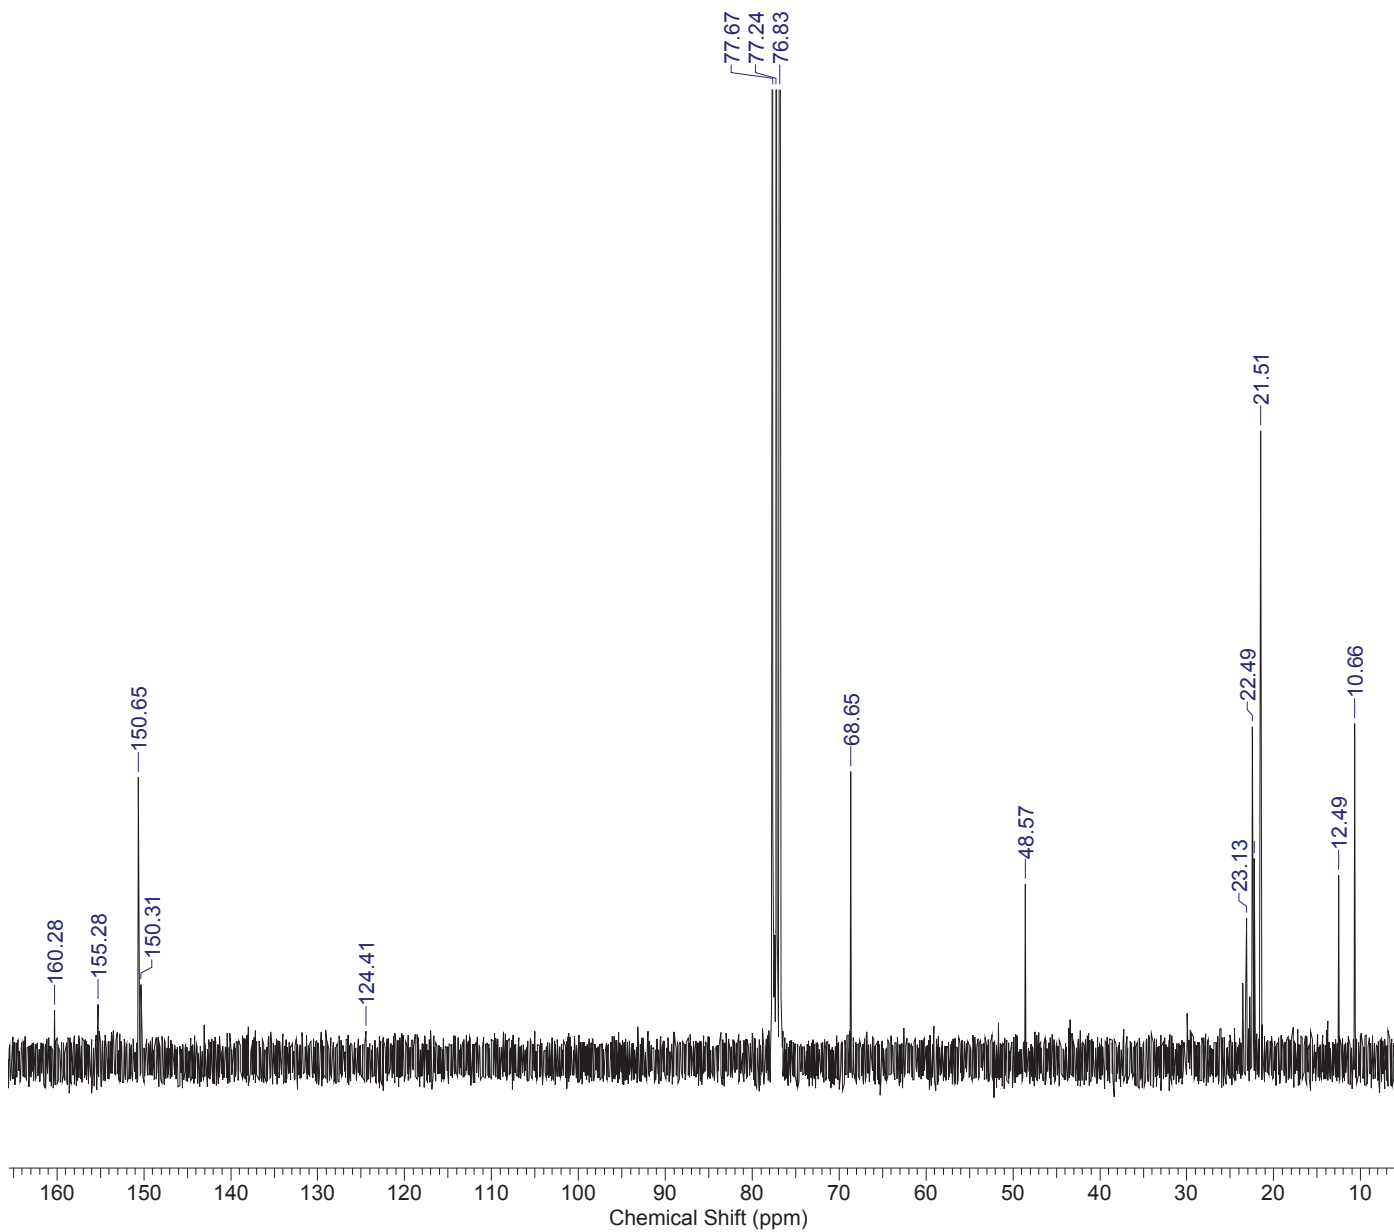

| No. | (ppm)  | (Hz)    | Height |
|-----|--------|---------|--------|
| 1   | 10.66  | 804.6   | 0.1251 |
| 2   | 12.49  | 942.9   | 0.0691 |
| 3   | 21.51  | 1624.0  | 0.2337 |
| 4   | 22.20  | 1676.0  | 0.0753 |
| 5   | 22.49  | 1697.5  | 0.1240 |
| 6   | 23.13  | 1746.2  | 0.0532 |
| 7   | 48.57  | 3666.9  | 0.0657 |
| 8   | 68.65  | 5182.8  | 0.1075 |
| 9   | 76.83  | 5799.8  | 0.9759 |
| 10  | 77.24  | 5831.4  | 0.9895 |
| 11  | 77.67  | 5863.4  | 1.0000 |
| 12  | 124.41 | 9391.8  | 0.0113 |
| 13  | 150.31 | 11347.4 | 0.0285 |
| 14  | 150.65 | 11372.8 | 0.1053 |
| 15  | 155.28 | 11722.8 | 0.0213 |
| 16  | 160.28 | 12099.8 | 0.0190 |

Elemental Composition Report

Single Mass Analysis

Tolerance = 5.0 PPM / DBE: min = -1.5, max = 50.0

Element prediction: Off

Number of isotope peaks used for i-FIT = 3

Monoisotopic Mass, Even Electron Ions  
 933 formula(e) evaluated with 1 results within limits (up to 50 closest results for each mass)

Elements Used:

C: 0-20 H: 0-1000 N: 0-10 O: 0-20 S: 0-1 Cl: 0-1

12/20093

1: TOF MS ES+  
 6.28e+002

A3 72 (1.585)

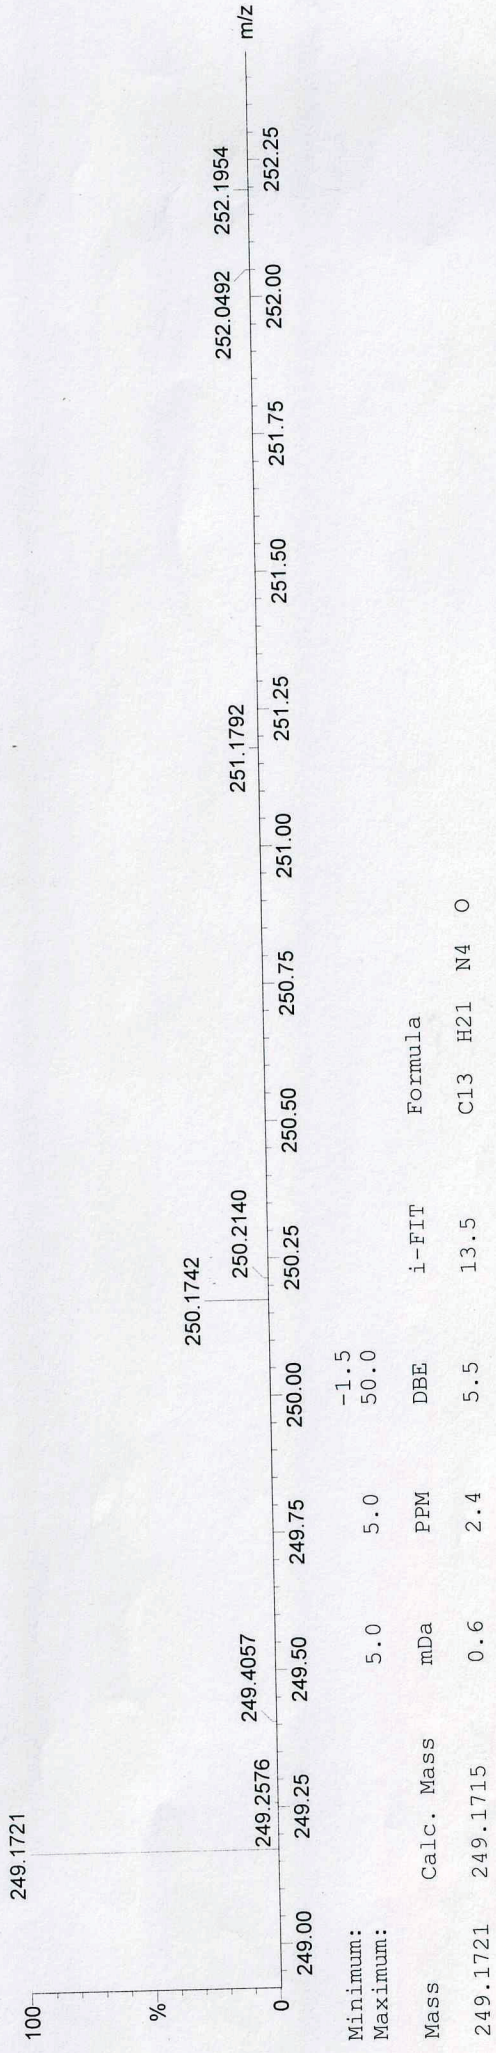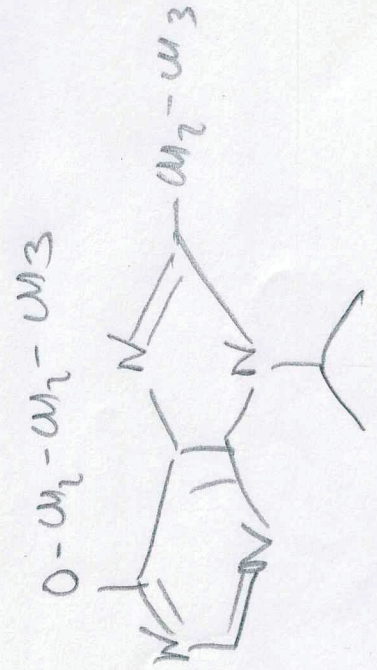



|                        |                                                                          |                  |          |                      |            |
|------------------------|--------------------------------------------------------------------------|------------------|----------|----------------------|------------|
| Acquisition Time (sec) | 2.0487                                                                   | Comment          | ASIMJ-28 | Date                 | Nov 8 2012 |
| File Name              | C:\Users\usuario\Documents\Espectros Asier\12-22927 ASIMJ-28\1H-ASIMJ-28 |                  |          |                      |            |
| Frequency (MHz)        | 300.20                                                                   | Nucleus          | 1H       | Number of Transients | 64         |
| Original Points Count  | 7380                                                                     | Points Count     | 8192     | Pulse Sequence       | s2pul      |
| Solvent                | CHLOROFORM-D                                                             | Sweep Width (Hz) | 3602.31  |                      |            |
| Temperature (degree C) | 30.000                                                                   |                  |          |                      |            |

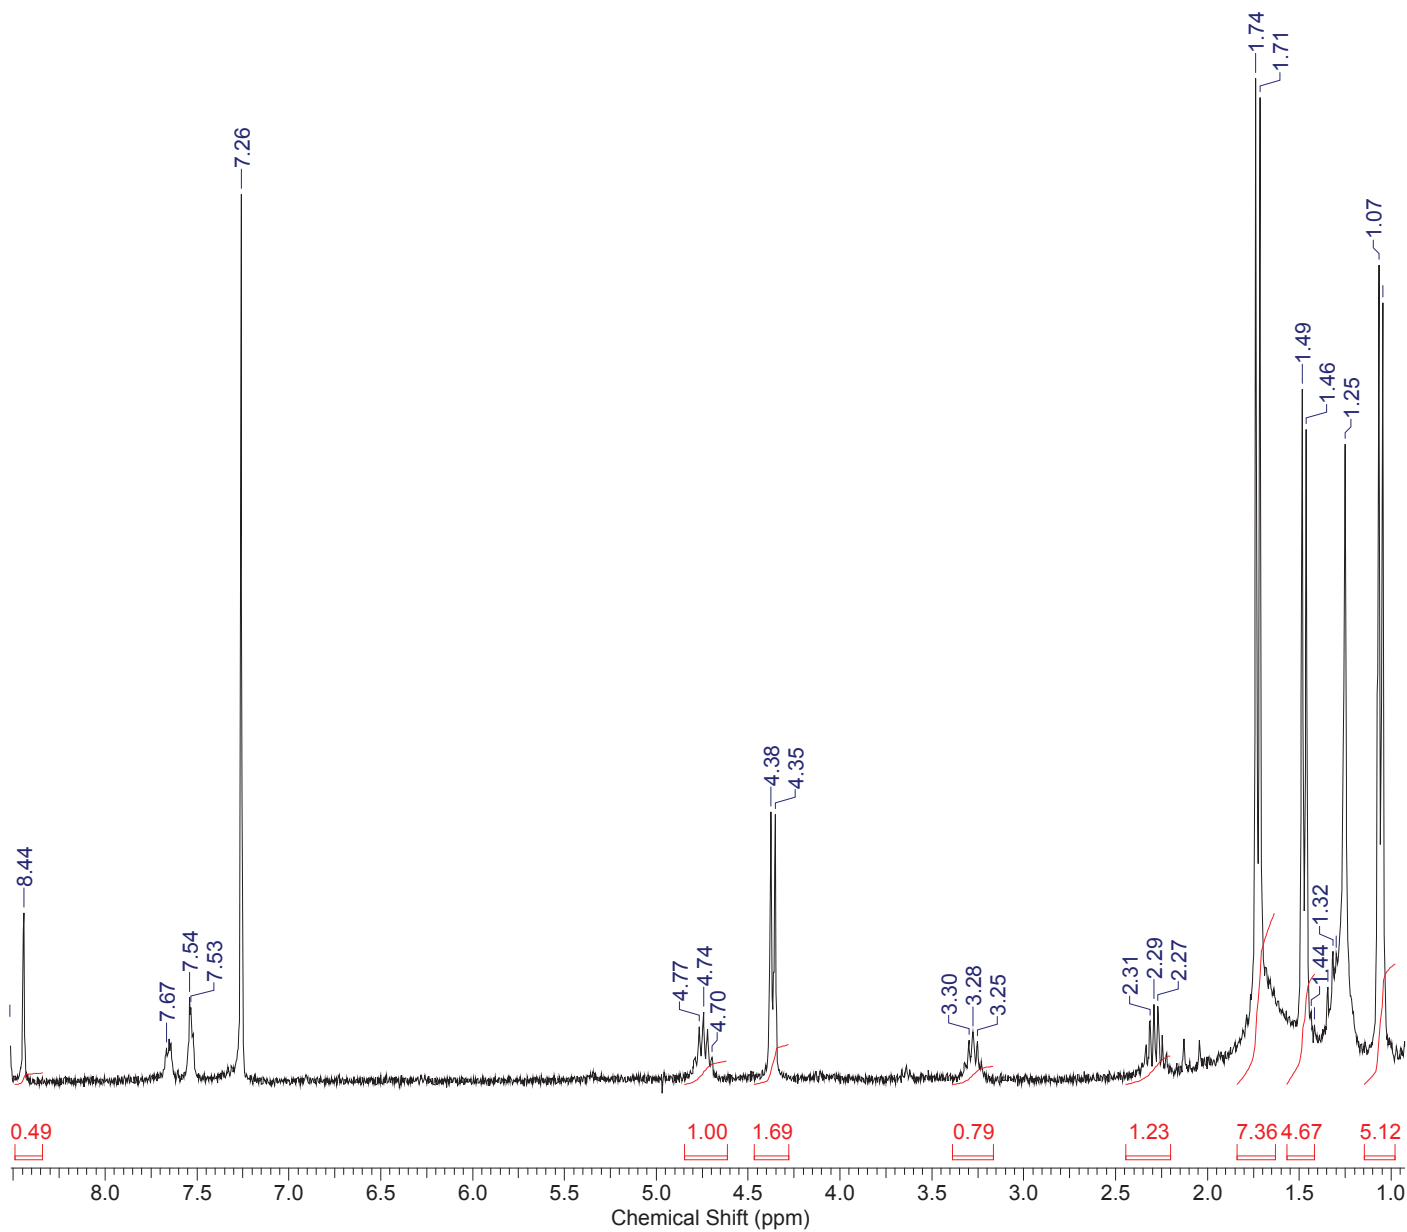

| No. | (ppm) | (Hz)  | Height |
|-----|-------|-------|--------|
| 1   | 0.90  | 270.8 | 0.0616 |
| 2   | 1.05  | 313.9 | 0.7765 |
| 3   | 1.07  | 320.5 | 0.8141 |
| 4   | 1.25  | 375.9 | 0.6365 |
| 5   | 1.30  | 390.4 | 0.1307 |
| 6   | 1.32  | 395.2 | 0.1323 |
| 7   | 1.35  | 404.0 | 0.0966 |
| 8   | 1.42  | 426.0 | 0.0595 |
| 9   | 1.44  | 431.3 | 0.0728 |
| 10  | 1.46  | 438.8 | 0.6506 |
| 11  | 1.49  | 445.8 | 0.6911 |
| 12  | 1.71  | 514.4 | 0.9806 |
| 13  | 1.74  | 521.4 | 1.0000 |
| 14  | 2.27  | 681.1 | 0.0776 |
| 15  | 2.29  | 687.7 | 0.0800 |

| No. | (ppm) | (Hz)   | Height |
|-----|-------|--------|--------|
| 16  | 2.31  | 694.3  | 0.0634 |
| 17  | 3.25  | 976.6  | 0.0428 |
| 18  | 3.28  | 983.7  | 0.0524 |
| 19  | 3.30  | 990.3  | 0.0439 |
| 20  | 4.35  | 1306.5 | 0.2686 |
| 21  | 4.38  | 1313.5 | 0.2709 |
| 22  | 4.70  | 1410.3 | 0.0271 |
| 23  | 4.74  | 1423.9 | 0.0719 |
| 24  | 4.77  | 1430.5 | 0.0572 |
| 25  | 7.26  | 2179.5 | 0.8846 |
| 26  | 7.53  | 2261.3 | 0.0765 |
| 27  | 7.54  | 2263.9 | 0.0865 |
| 28  | 7.67  | 2301.3 | 0.0365 |
| 29  | 8.44  | 2534.8 | 0.1705 |
| 30  | 8.52  | 2557.2 | 0.0618 |

| No. | (ppm)          | Value | Absolute Value |
|-----|----------------|-------|----------------|
| 1   | [0.98 .. 1.15] | 5.125 | 3.00038e+8     |
| 2   | [1.42 .. 1.57] | 4.671 | 2.73462e+8     |
| 3   | [1.63 .. 1.84] | 7.357 | 4.30721e+8     |
| 4   | [2.20 .. 2.44] | 1.231 | 7.20844e+7     |
| 5   | [3.16 .. 3.39] | 0.786 | 4.60005e+7     |
| 6   | [4.28 .. 4.47] | 1.692 | 9.90542e+7     |
| 7   | [4.61 .. 4.85] | 1.000 | 5.85494e+7     |
| 8   | [8.34 .. 8.49] | 0.490 | 2.86777e+7     |

### Elemental Composition Report

#### Single Mass Analysis

Tolerance = 5.0 PPM / DBE: min = -1.5, max = 50.0

Element prediction: Off

Number of isotope peaks used for i-FIT = 3

Monoisotopic Mass, Even Electron Ions

910 formula(e) evaluated with 2 results within limits (up to 50 closest results for each mass)

Elements Used:

C: 0-23 H: 0-1000 N: 0-10 O: 0-10 Cl: 0-1 Br: 0-1

12/22452

MJ-28 96 (2.120)

1: TOF MS ES+  
1.15e+002

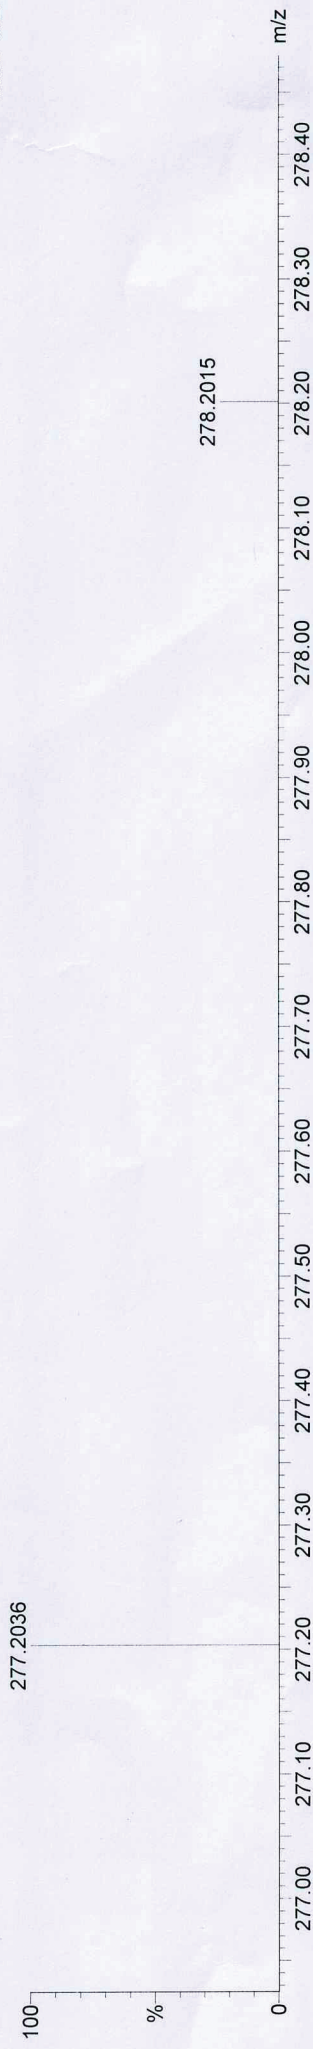

Minimum:  
Maximum:

-1.5  
50.0

| Mass     | Calc. Mass | mDa  | PPM  | DBE | i-FIT | Formula         |
|----------|------------|------|------|-----|-------|-----------------|
| 277.2036 | 277.2028   | 0.8  | 2.9  | 5.5 | n/a   | C15 H25 N4 O    |
|          | 277.2047   | -1.1 | -4.0 | 0.5 | n/a   | C14 H30 N2 O Cl |

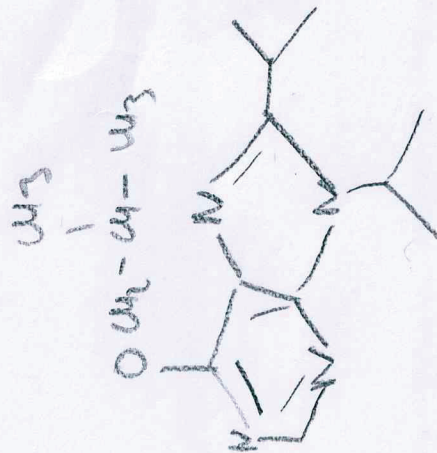

Supplement: srep09139-s1.pdf [file srep09139-s1.pdf]
